# Supplementary material
Source: publisher figshare collection journal article supplement (https://acs.figshare.com/ndownloader/files/4655965)

## Supporting Information

### Self-Assembly of Non-cyclic Bis-D,L-tripeptides into Higher Order Tubular Constructs – Design, Synthesis and X-ray Crystal Superstructure

Stephen Hanessian, Valerio Vinci , Kamal Fettis, Thierry Maris and Minh Tan Phan Viet

#### Contents

|                                                                                                                   |              |
|-------------------------------------------------------------------------------------------------------------------|--------------|
| <b>Crystal and molecular structure of compound 13.....</b>                                                        | <b>S2-S9</b> |
| Table S1. Crystal data and structure refinement for compound <b>13</b> .....                                      | S4           |
| Table S2. Bond lengths [Å] and angles [°] related to the hydrogen bonding for compound <b>13</b> .....            | S5           |
| Figure S1. ORTEP view of the first symmetry independent molecule <b>A</b> with the numbering scheme adopted.....  | S7           |
| Figure S2. ORTEP view of the first symmetry independent molecule <b>B</b> with the numbering scheme adopted ..... | S8           |
| Figure S3. ORTEP view of the solvent molecules with the numbering scheme adopted.....                             | S9           |
| Figure S4. Superposition of the two symmetry independent molecules <b>A</b> and <b>B</b> .....                    | S9           |
| Figure S5. <sup>1</sup> H NMR dilution experiments ( <b>5</b> , <b>13</b> , <b>18</b> ).....                      | S10          |
| Figure S6 <sup>1</sup> H NMR DMSO titration data ( <b>5</b> , <b>11</b> , <b>13</b> , <b>18</b> ).....            | S11          |
| Figure S7 <sup>1</sup> H NMR DMSO titration ( <b>13</b> , <b>18</b> , <b>1:1 mixture</b> ).....                   | S12          |
| Figure S8 <sup>1</sup> H NMR DMSO titration and MeOH exchange ( <b>14</b> ).....                                  | S13          |
| Figure S9 Typical NOESY spectrum for compound <b>27</b> .....                                                     | S14          |
| <b>References.....</b>                                                                                            | <b>S15</b>   |
| <b>Printed NMR spectra for the new compounds.....</b>                                                             | <b>S16</b>   |

## CRYSTAL AND MOLECULAR STRUCTURE OF COMPOUND 13

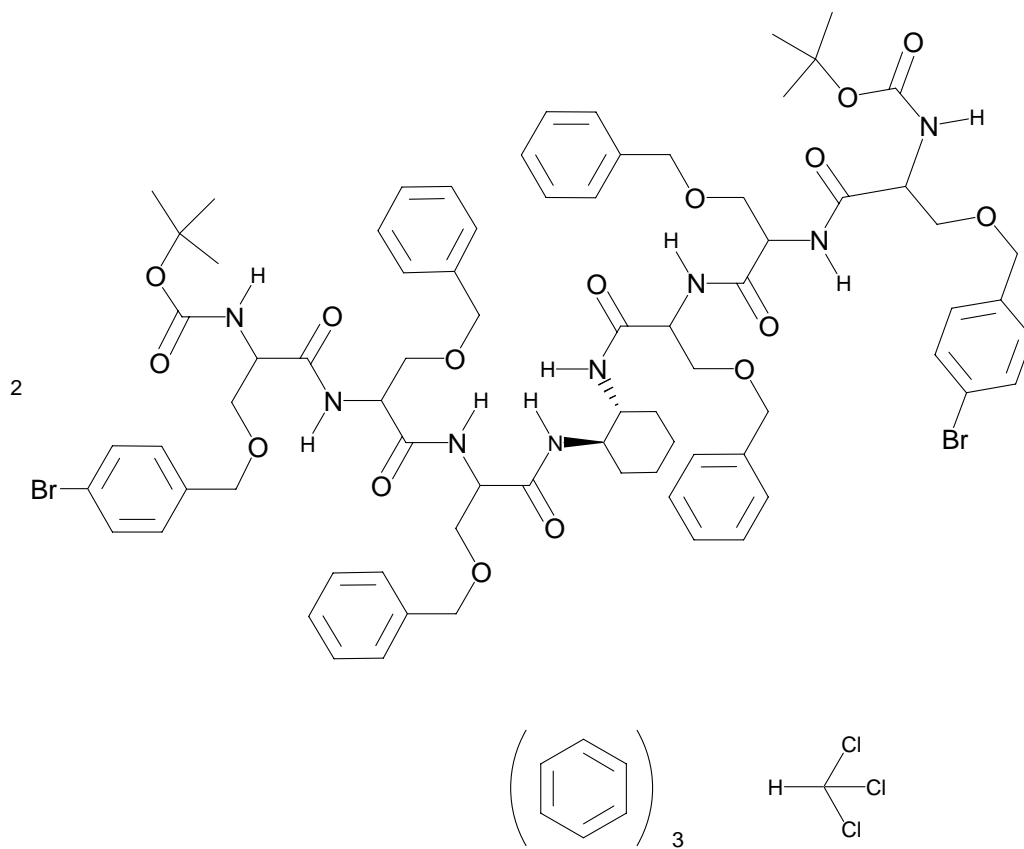

X-ray crystallographic data were obtained from a single crystal sample which was mounted on a loop fiber. Data were collected at 100 K on a Bruker three circle platform diffractometer equipped with a 4K Charged-Coupled Device (CCD) Area Detector, a Montel 200 multi-layer optic and a FR591 6KW rotating anode generator ( $\text{CuK}\alpha$ ) loading on a 100 micron focal spot. The crystal-to-detector distance was 5.102 cm, and the data collection was carried out in 512 x 512 pixel mode, utilizing 4 x 4 pixel binning. The initial unit cell parameters were determined by a least-squares fit of the angular setting of strong reflections, collected by a 9.0 degree scan in 30 frames over four different parts of the reciprocal space (120 frames total). One complete sphere of data was collected, to better than 0.85 Å resolution. Upon completion of the data collection, the first 101 frames were recollected in order to improve the decay correction analysis.

This sample despite the specimen size did not diffract too much and the data appear truncated at low resolution. The structure was solved using direct methods with SIR2002 (Burla et al., 2003) which found two symmetry-independent molecules in the asymmetric unit. Several full-matrix least squares / difference Fourier cycles were performed which located the remainder of the non-hydrogen atoms. Least-square refinements on  $F^2$  were performed using ShelxH (the version of Shelxl-97 suitable for large-scale problem, Sheldrick, 1997). Hydrogen atoms were refined using a riding model with fixed thermal parameters. Some difficulties were experienced in the refinement procedure due to the large size of the molecule. 3866 similarity restraints on distances, geometry and thermal displacement parameter were added to the model to assist in the refinement.

In the course of the refinement, two benzene and one  $\text{CHCl}_3$  molecules were located by Fourier difference map and were found no too much disordered in the crystal lattice. A third benzene molecule at the vicinity of a methoxymethyl-benzene arms appeared disordered to such extent that few difference peaks were visible. The data were then treated with the Squeeze/Bypass method (van der Sluis & Spek, 1990) implemented in Platon (Spek, 2000) to subtract the effects of this disordered solvent molecule and to optimize the structural characterization of the ordered part of the structure. Only the 2 benzene and the  $\text{CHCl}_3$  molecules were kept in the final refinement, but the structure is reported with formula including the three benzene molecules.

**Table S1.** Crystal data and structure refinement for compound **13**.

|                                 |                                                                                                                  |
|---------------------------------|------------------------------------------------------------------------------------------------------------------|
| Identification code             | Han398                                                                                                           |
| Empirical formula               | C <sub>165</sub> H <sub>201</sub> Br <sub>4</sub> Cl <sub>3</sub> N <sub>16</sub> O <sub>32</sub>                |
| Formula weight                  | 3346.38                                                                                                          |
| Temperature                     | 100(2)K                                                                                                          |
| Wavelength                      | 1.54178 Å                                                                                                        |
| Crystal system                  | Orthorhombic                                                                                                     |
| Space group                     | P2 <sub>1</sub> 2 <sub>1</sub> 2 <sub>1</sub>                                                                    |
| Unit cell dimensions            | a = 18.146(2) Å $\alpha = 90^\circ$<br>b = 26.468(3) Å $\beta = 90^\circ$<br>c = 35.413(3) Å $\gamma = 90^\circ$ |
| Volume                          | 17009(3) Å <sup>3</sup>                                                                                          |
| Z                               | 4                                                                                                                |
| Density (calculated)            | 1.307 g/cm <sup>3</sup>                                                                                          |
| Absorption coefficient          | 2.196 mm <sup>-1</sup>                                                                                           |
| F(000)                          | 7000                                                                                                             |
| Crystal size                    | 0.12 x 0.08 x 0.05 mm                                                                                            |
| Theta range for data collection | 2.08 to 68.05°                                                                                                   |
| Index ranges                    | -21 ≤ h ≤ 21, -31 ≤ k ≤ 31, -42 ≤ l ≤ 42                                                                         |
| Reflections collected           | 167546                                                                                                           |
| Independent reflections         | 28888 [R <sub>int</sub> = 0.055]                                                                                 |
| Absorption correction           | Semi-empirical from equivalents                                                                                  |
| Max. and min. transmission      | 0.9000 and 0.7800                                                                                                |
| Refinement method               | Full-matrix least-squares on F <sup>2</sup>                                                                      |
| Data / restraints / parameters  | 28888 / 618 / 1886                                                                                               |

|                                      |                                   |
|--------------------------------------|-----------------------------------|
| Goodness-of-fit on $F^2$             | 1.107                             |
| Final R indices [ $I > 2\sigma(I)$ ] | $R_1 = 0.0888$ , $wR_2 = 0.2119$  |
| R indices (all data)                 | $R_1 = 0.0937$ , $wR_2 = 0.2133$  |
| Absolute structure parameter         | -0.10(2) (Flack, 1983)            |
| Largest diff. peak and hole          | 0.493 and -0.325 e/Å <sup>3</sup> |

**Table S2.** Bond lengths [Å] and angles [°] related to the hydrogen bonding for compound **13**.

| D-H                     | ..A   | d(D-H) | d(H..A) | d(D..A)  | <DHA  |
|-------------------------|-------|--------|---------|----------|-------|
| <b>Molecule A -----</b> |       |        |         |          |       |
| <b>Intramolecular</b>   |       |        |         |          |       |
| N10-H10                 | O20   | 0.88   | 2.20    | 2.903(4) | 138.4 |
| N11-H11                 | O24   | 0.88   | 2.16    | 2.935(4) | 148.8 |
| N21-H21                 | O14   | 0.88   | 1.99    | 2.800(4) | 168.6 |
| <b>Intermolecular</b>   |       |        |         |          |       |
| N14-H14                 | O42#1 | 0.88   | 2.03    | 2.869(4) | 159.1 |
| N20-H20                 | O36#2 | 0.88   | 2.23    | 3.065(5) | 153.6 |
| N24-H24                 | O32#2 | 0.88   | 2.30    | 2.998(4) | 144.0 |
| N26-H26                 | O32#2 | 0.88   | 2.15    | 2.950(7) | 144.0 |
| <b>Molecule B -----</b> |       |        |         |          |       |
| <b>Intramolecular</b>   |       |        |         |          |       |
| N30-H30                 | O40   | 0.88   | 2.26    | 2.991(5) | 137.7 |
| N31-H31                 | O44   | 0.88   | 2.06    | 2.872(5) | 155.3 |
| N41-H41                 | O34   | 0.88   | 2.04    | 2.872(4) | 172.9 |
| <b>Intermolecular</b>   |       |        |         |          |       |
| N34-H34                 | O22#3 | 0.88   | 1.96    | 2.797(5) | 171.5 |
| N40-H40                 | O16#4 | 0.88   | 2.24    | 3.094(5) | 169.0 |
| N44-H44                 | O12#4 | 0.88   | 2.23    | 2.990(4) | 144.9 |
| N46-H46                 | O12#4 | 0.88   | 2.13    | 2.845(5) | 145.4 |

Symmetry transformations used to generate equivalent atoms:

|                        |                        |
|------------------------|------------------------|
| #1 x-1, y-1, z-1       | #2 -x+3/2, -y+1, z-1/2 |
| #3 -x+3/2, -y+1, z+1/2 | #4 x+1, y+1, z+1       |

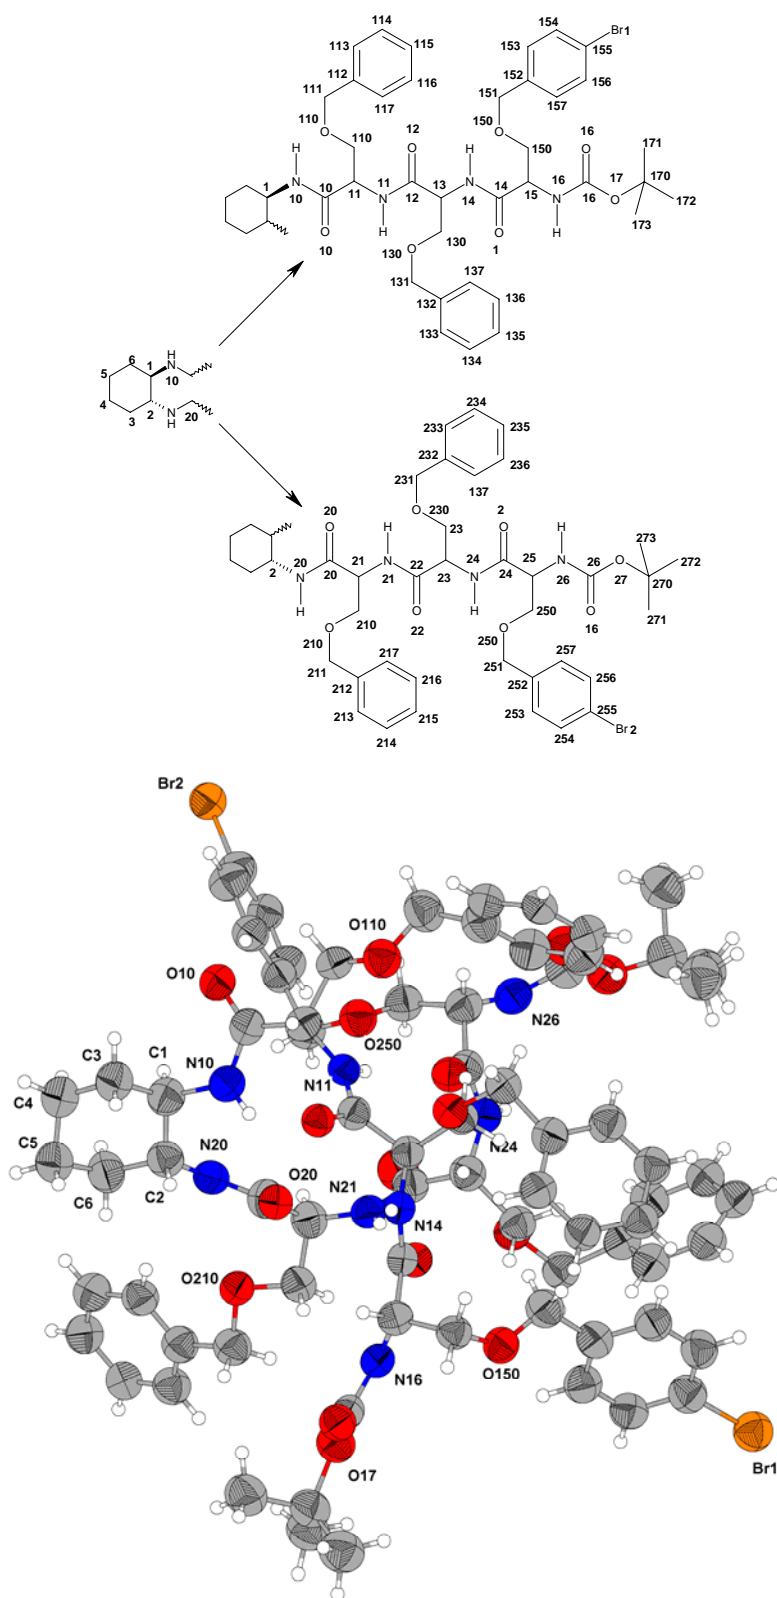

Figure S1. ORTEP view of the first symmetry independent molecule **A** with the numbering scheme adopted. Ellipsoids drawn at 30% probability level. Hydrogen atoms are represented by sphere of arbitrary size.

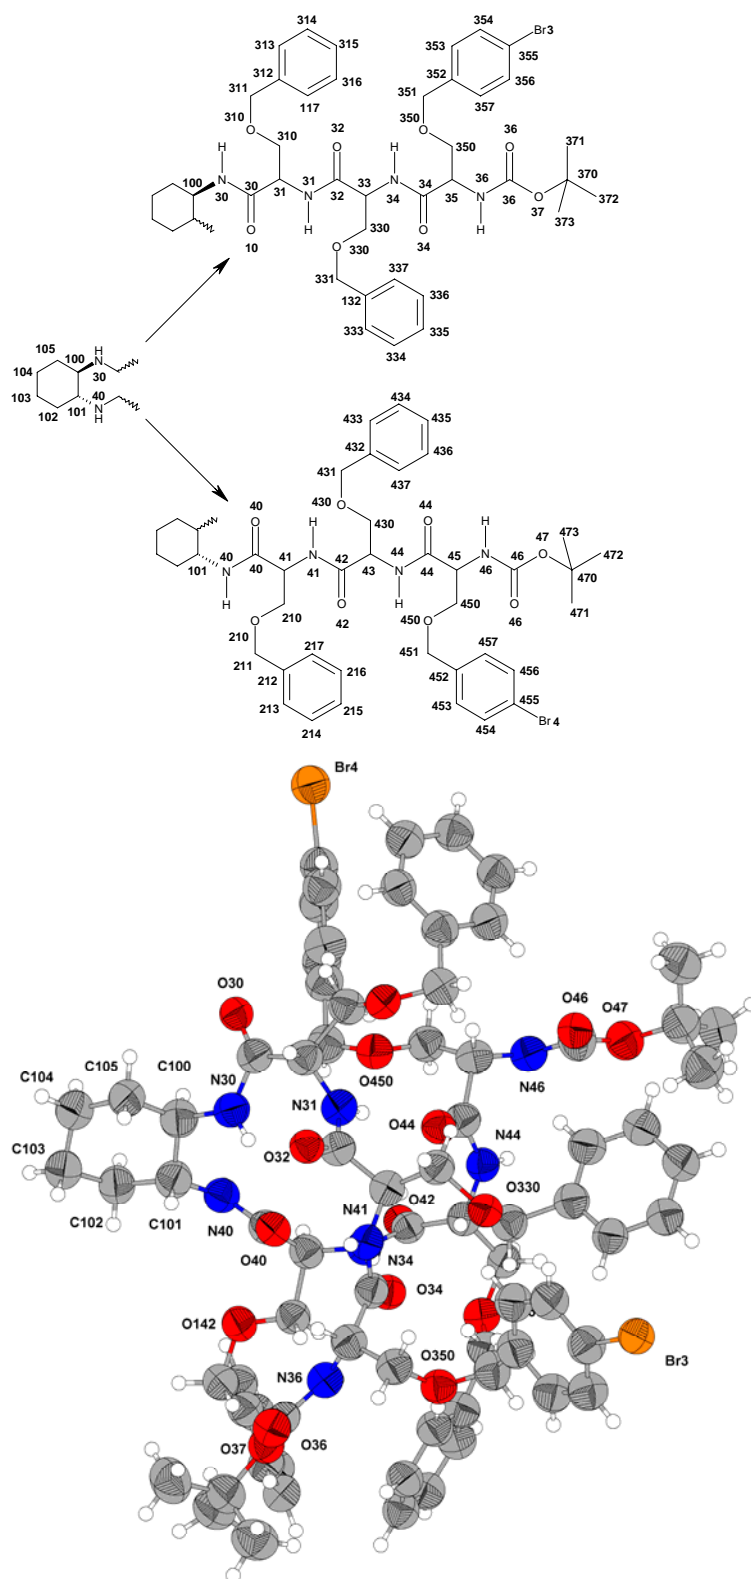

Figure S2. ORTEP view of the second symmetry independent molecule **B** with the numbering scheme adopted. Ellipsoids drawn at 30% probability level. Hydrogen atoms are represented by sphere of arbitrary size.



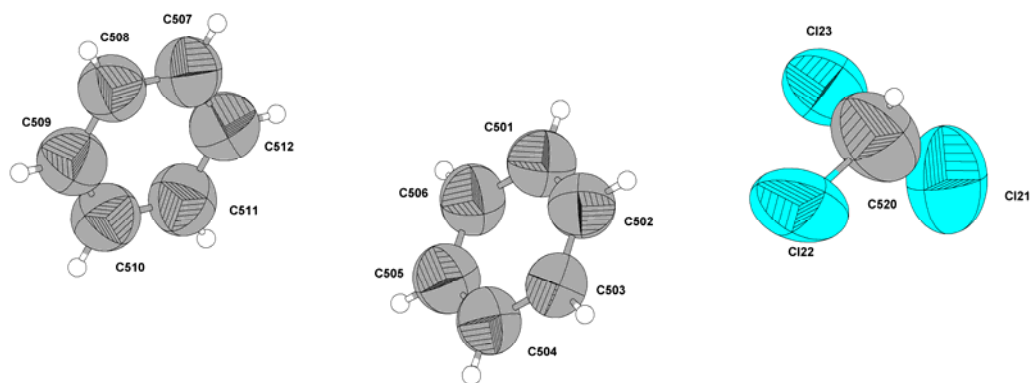

Figure **S3**. ORTEP view of the solvent molecules with the numbering scheme adopted. Ellipsoids drawn at 30% probability level. Hydrogen atoms are represented by sphere of arbitrary size.

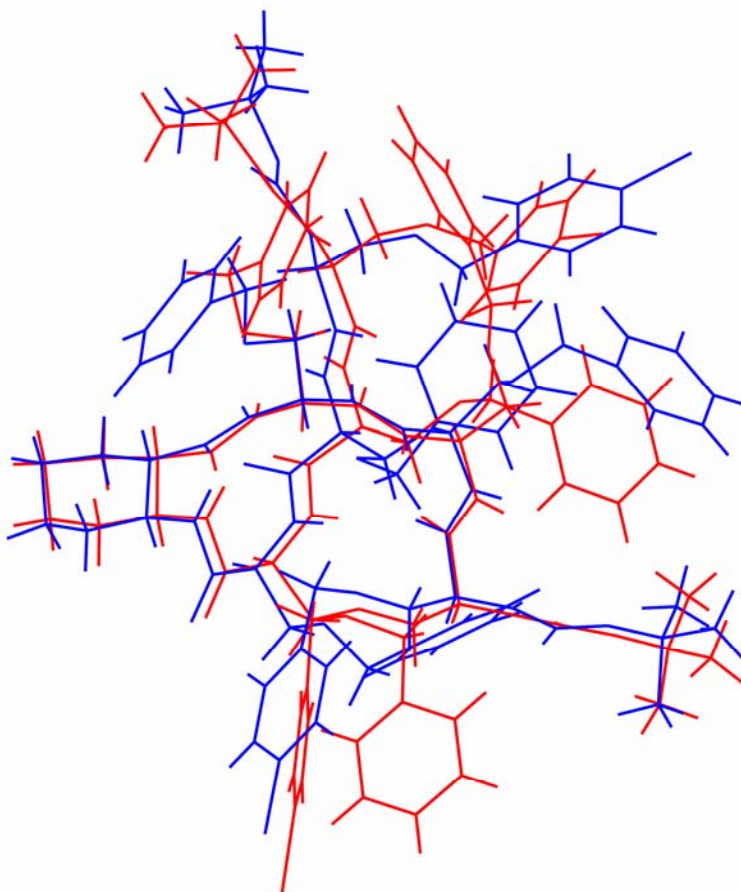

Figure **S4**. Superposition of the two symmetry independent molecules **A** and **B**.

**Figure S 5.**  $^1\text{H}$  NMR dilution experiment in  $\text{CDCl}_3$  on compounds **5** (A), **13** (B) and **18** (C).

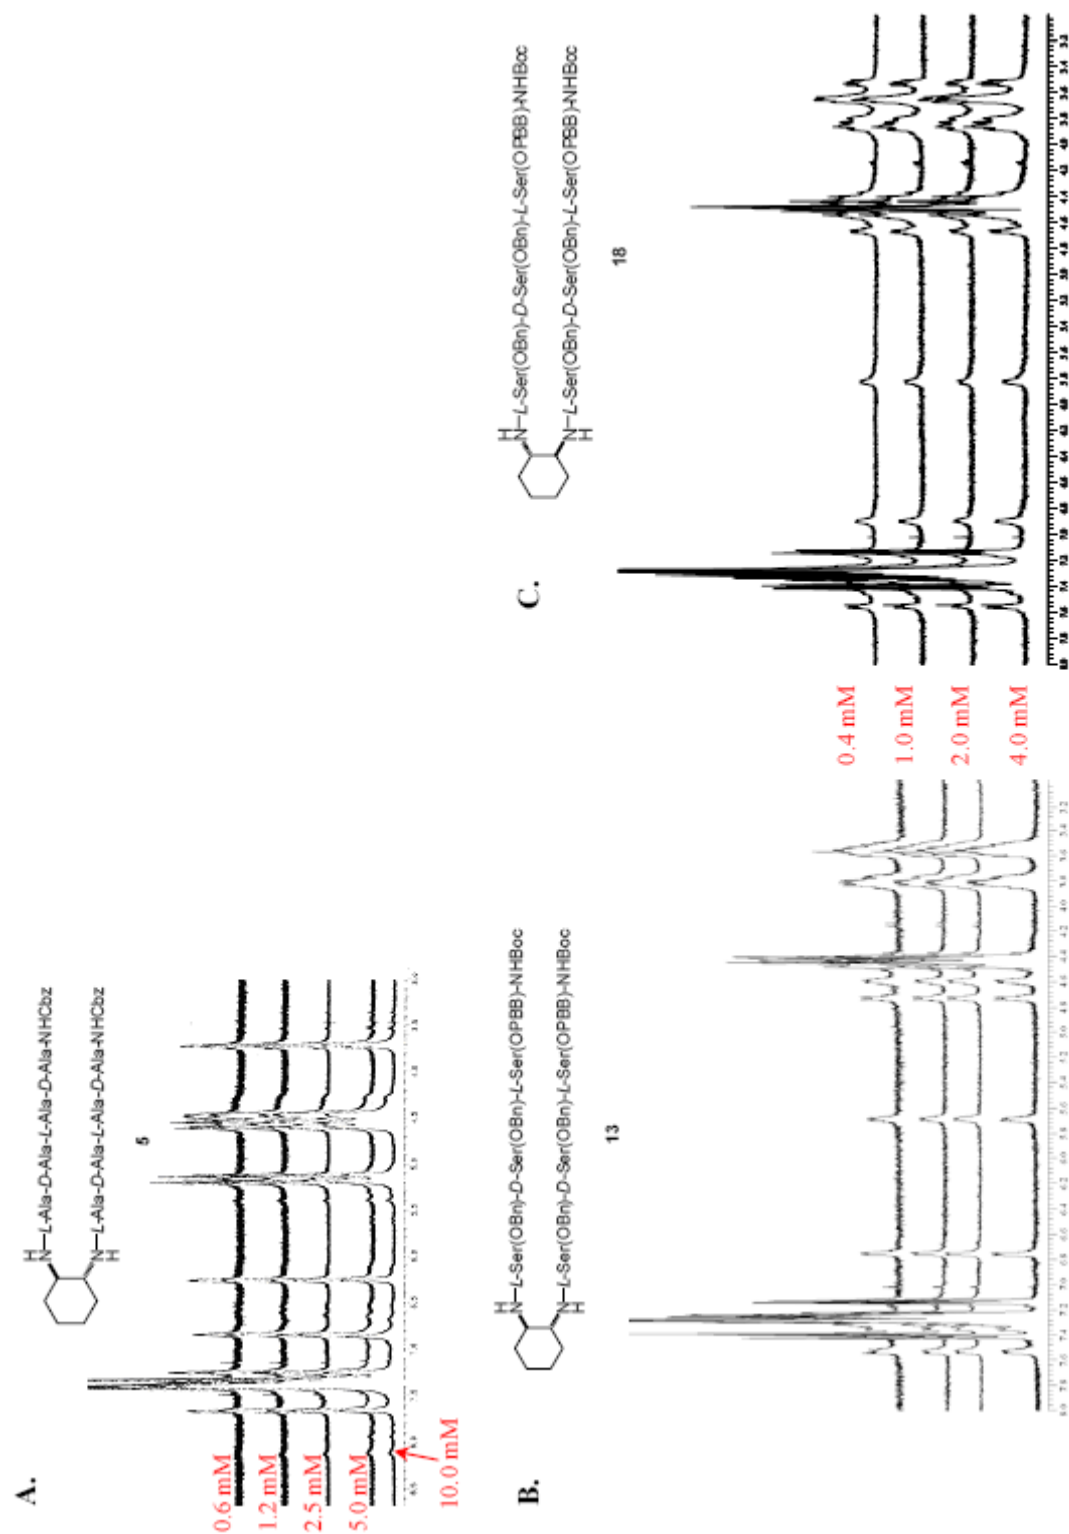

**Figure S 6.**  $^1\text{H}$  NMR DMSO- $d_6$  titration experiments in  $\text{CDCl}_3$  for compounds **5** (A), **11** (B), **13** (C) and **18** (D).

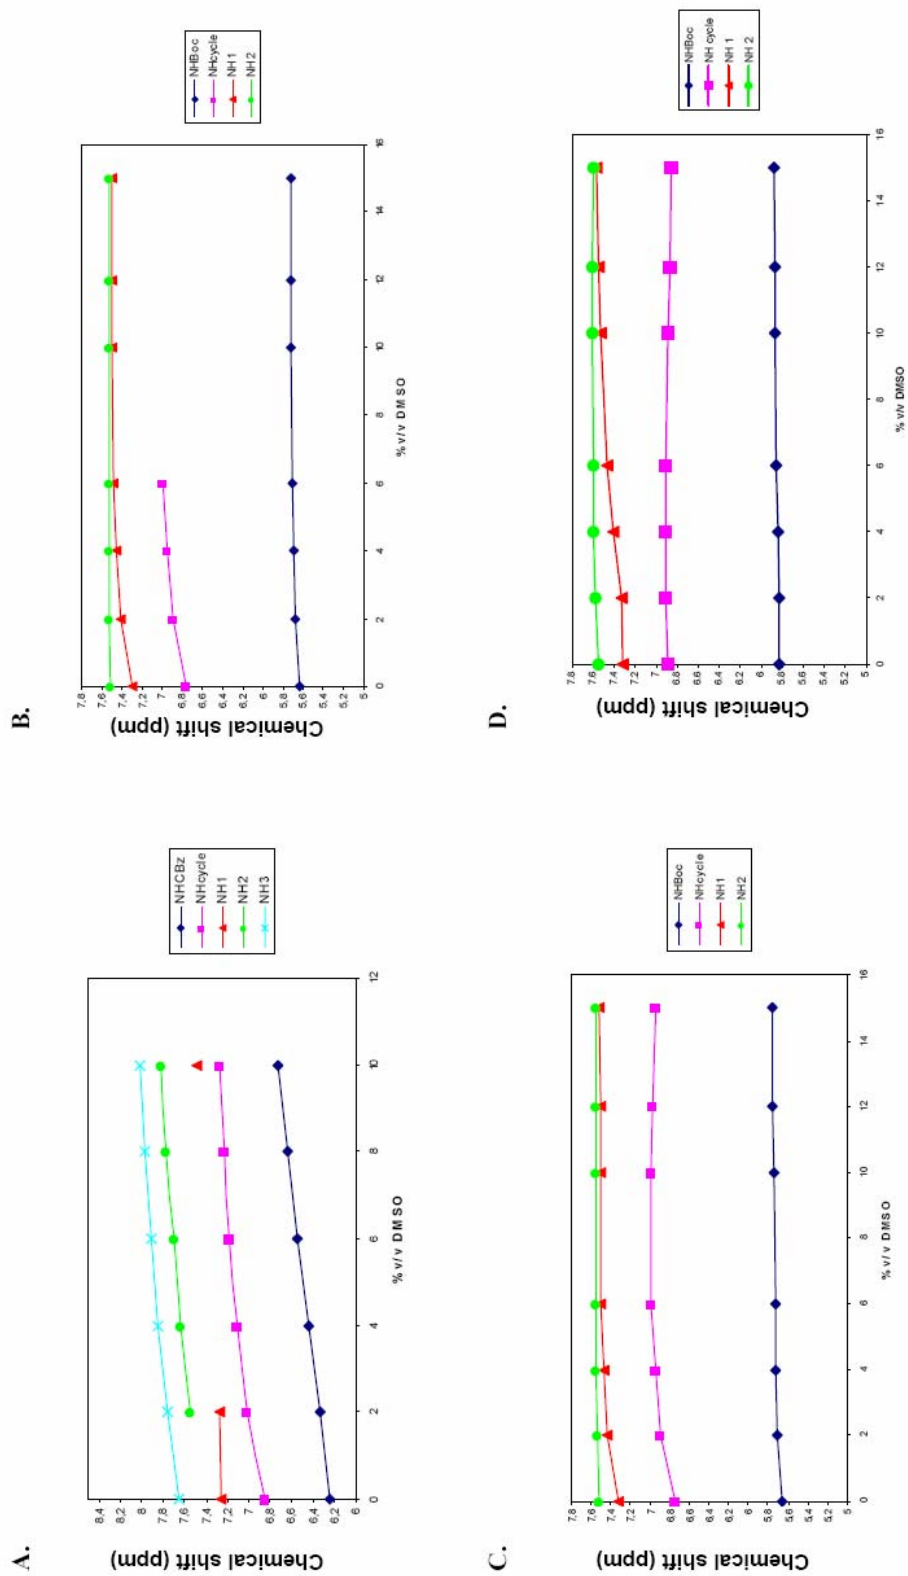

**Figure S7.**  $^1\text{H}$  NMR DMSO- $d_6$  titration experiment in  $\text{CDCl}_3$  on a 1:1 mixture of compounds **13** and **18**.

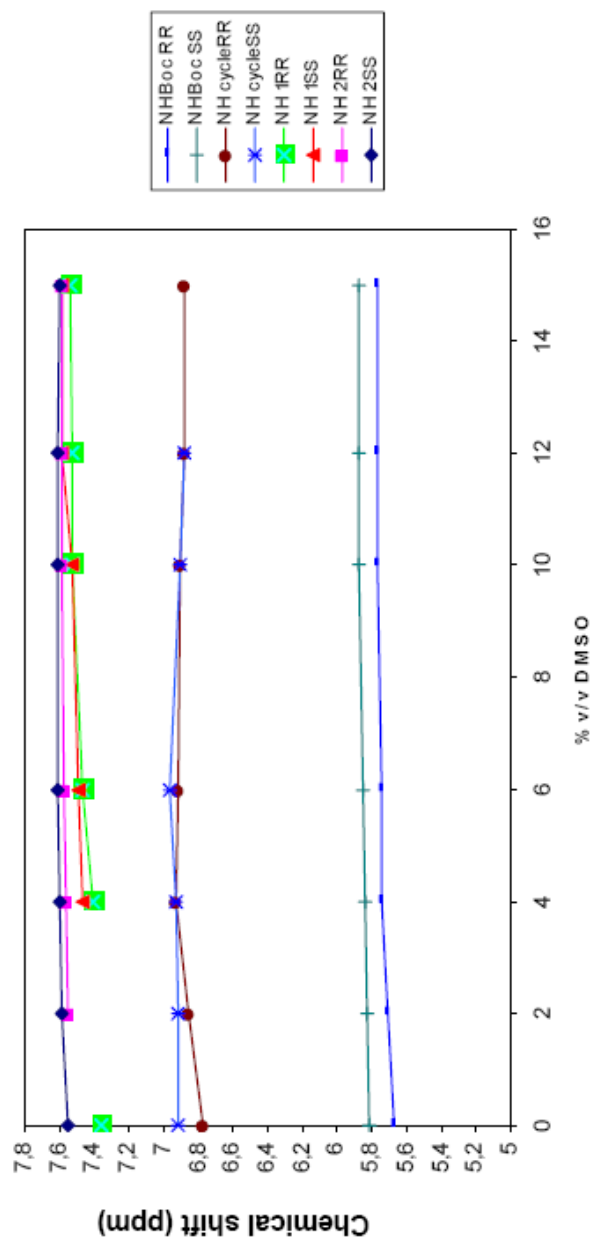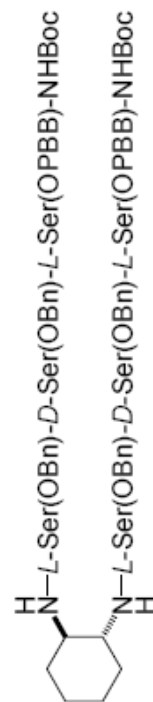

**13**

OPBB= p-bromobenzyl ether

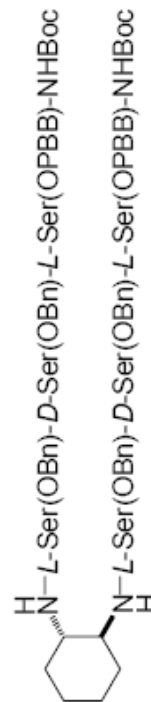

**18**

**Figure S 8.**  $^1\text{H}$  NMR DMSO- $d_6$  titration (**A**) and MeOH  $d_4$  exchange (**B**) experiments in Pyridine- $d_5$  for compound **14**.

**A.**

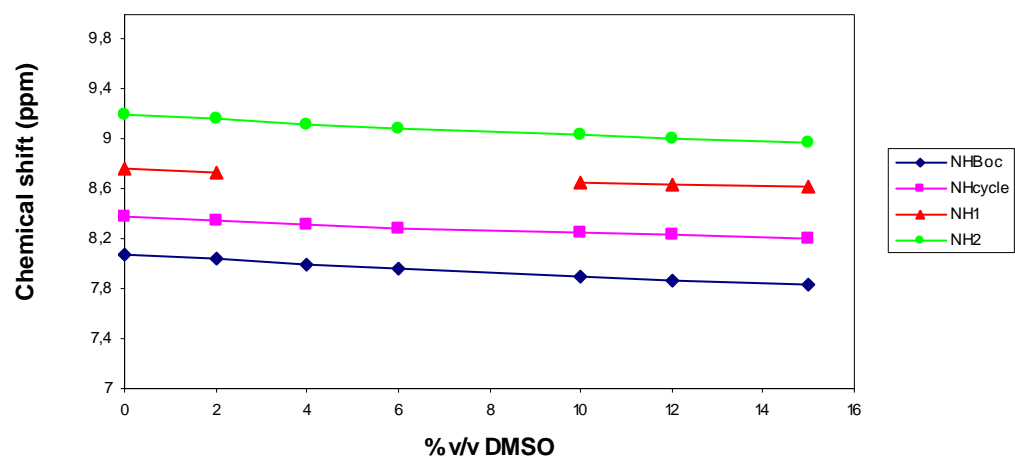

**B.**

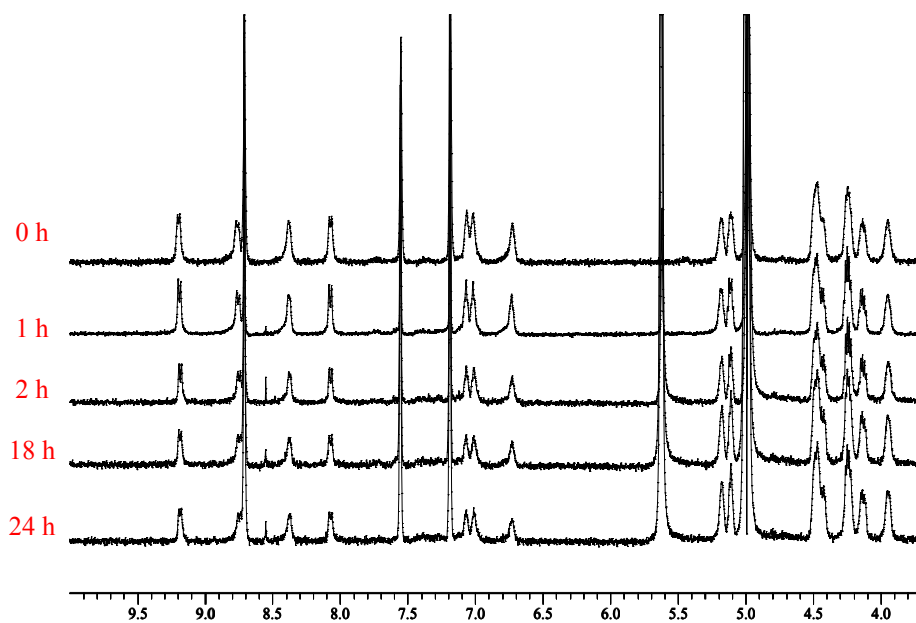

**Figure S 9.** Noesy spectrum of compound **27** showing the cross-talk between the two strands.

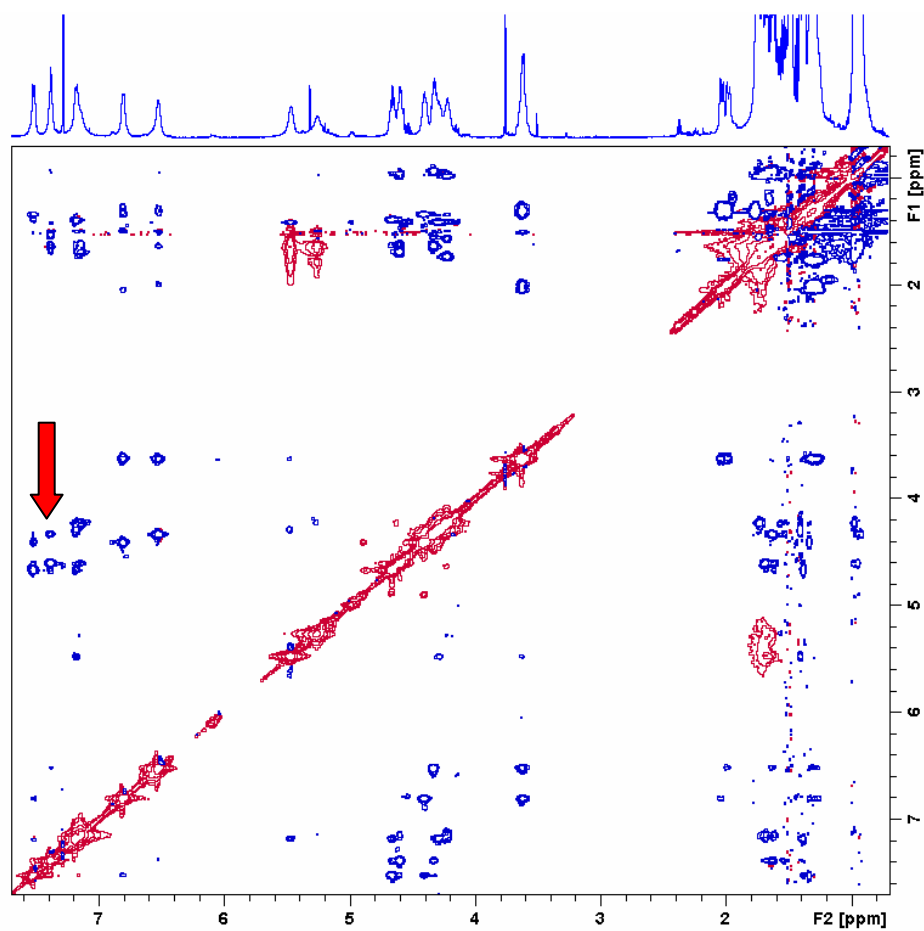

## REFERENCES

Burla, M. C., Carrozzini, B., Cascarano, G. L., De Caro, L., Giacovazzo, C. & Polidori, G. **(2003)**. Acta Cryst A59, 245-249.

Flack, H.D. **(1983)**. Acta Cryst. A39, 876-881.

Flack, H.D. and Schwarzenbach, D. **(1988)**. Acta Cryst. A44, 499-506.

SAINT **(1999)** Release 6.06; Integration Software for Single Crystal Data.  
Bruker AXS Inc., Madison, WI 53719-1173.

Sheldrick, G.M. **(1996)**. SADABS, Bruker Area Detector Absorption Corrections.  
Bruker AXS Inc., Madison, WI 53719-1173.

Sheldrick, G.M. **(1997)**. SHELXL97, Program for the Refinement of Crystal Structures. Univ. of Gottingen, Germany.

SHELXTL **(1997)** Release 5.10; The Complete Software Package for Single Crystal Structure Determination. Bruker AXS Inc., Madison, WI 53719-1173.

SMART **(1999)** Release 5.059; Bruker Molecular Analysis Research Tool.  
Bruker AXS Inc., Madison, WI 53719-1173.

Spek, A.L. **(2000)**. PLATON, Molecular Geometry Program, 2000 version.  
University of Utrecht, Utrecht, Holland.

Van der Sluis, P., Spek, A. L. **(1990)**, Acta Cryst A46, 194-201.  
XPREP **(1997)** Release 5.10; X-ray data Preparation and Reciprocal space Exploration Program.  
Bruker AXS Inc., Madison, WI 53719-1173.

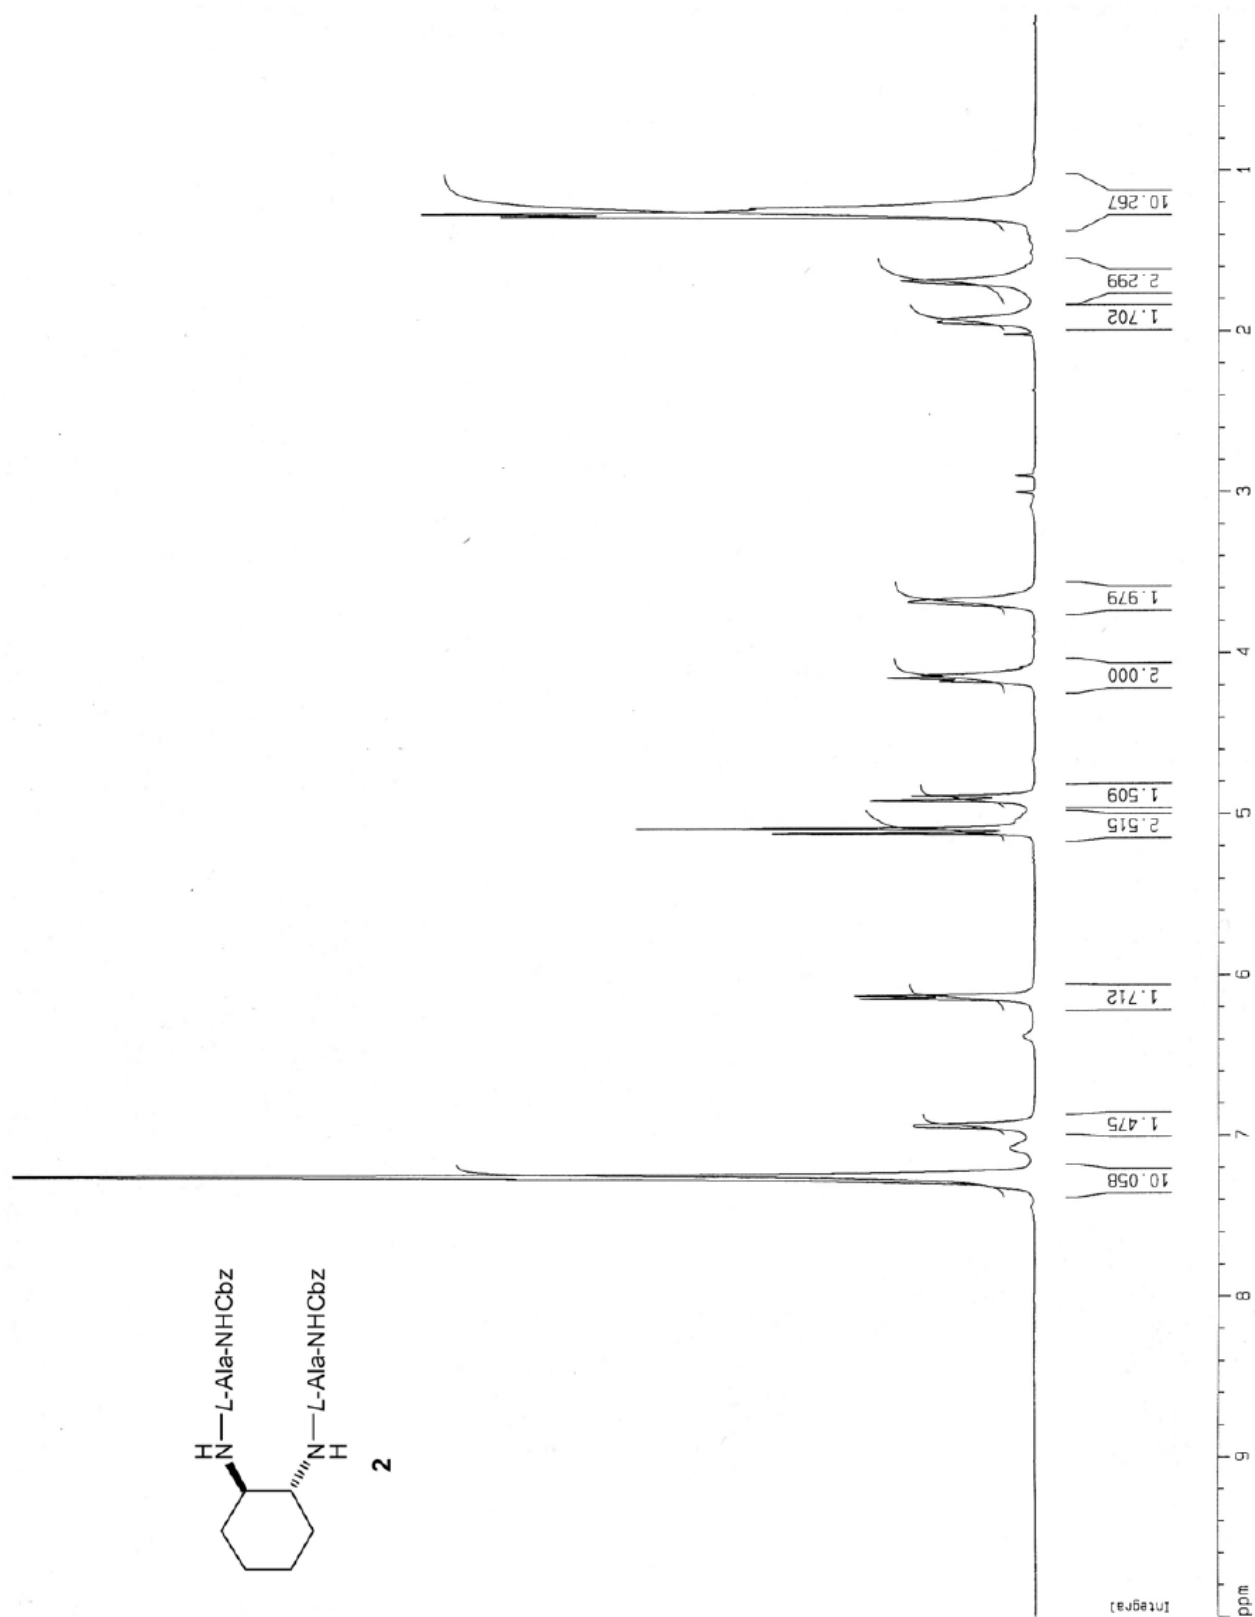



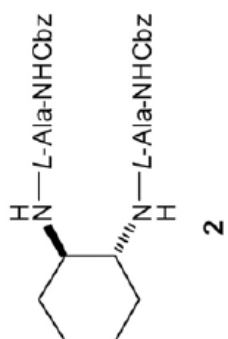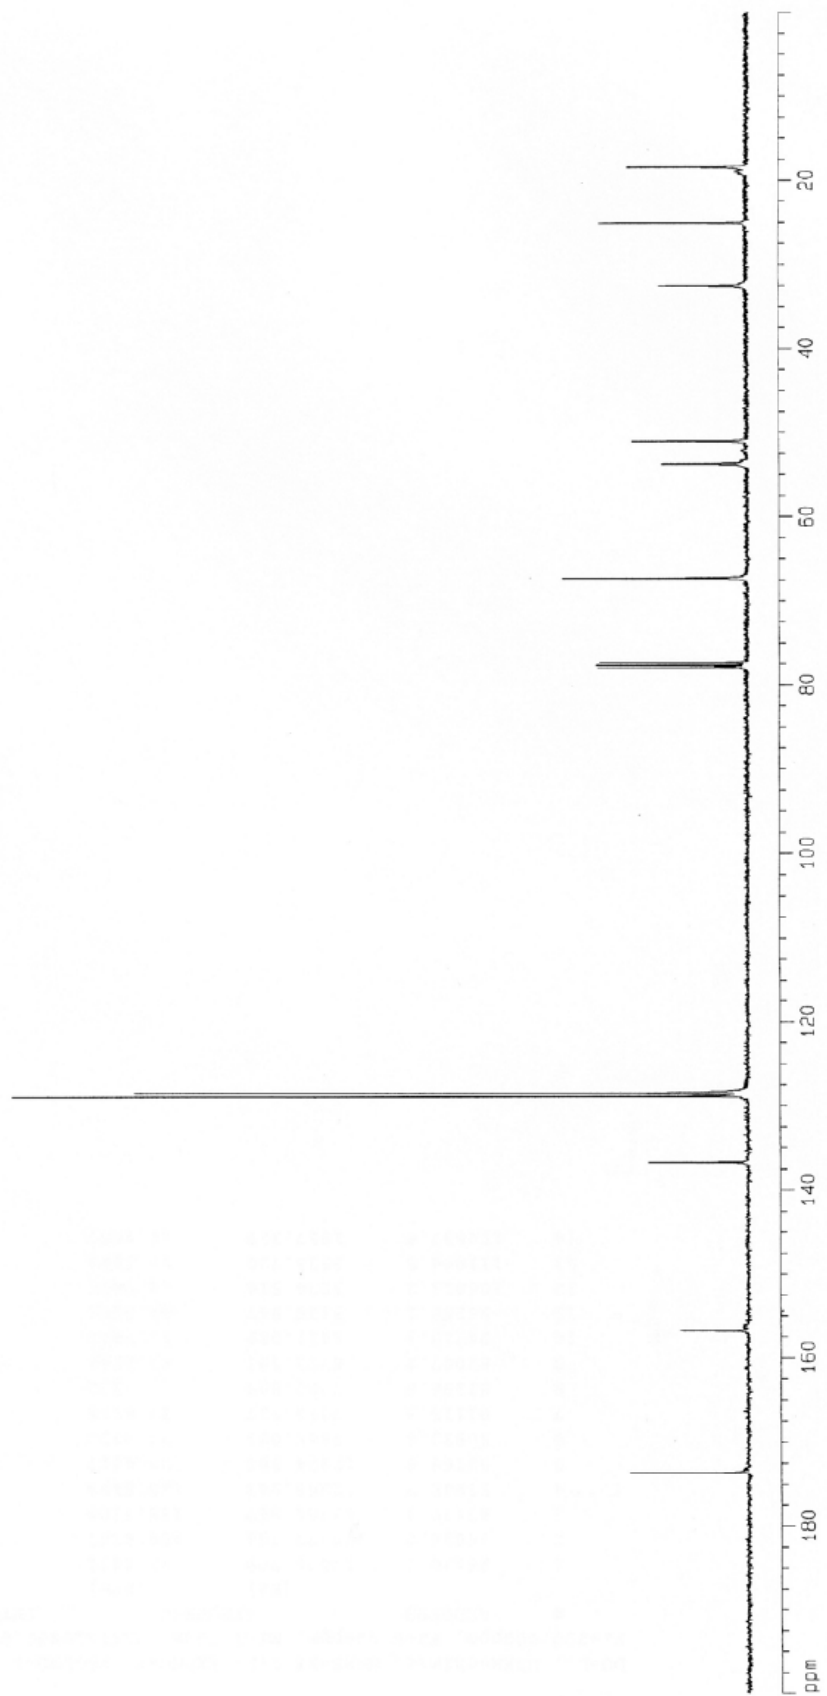

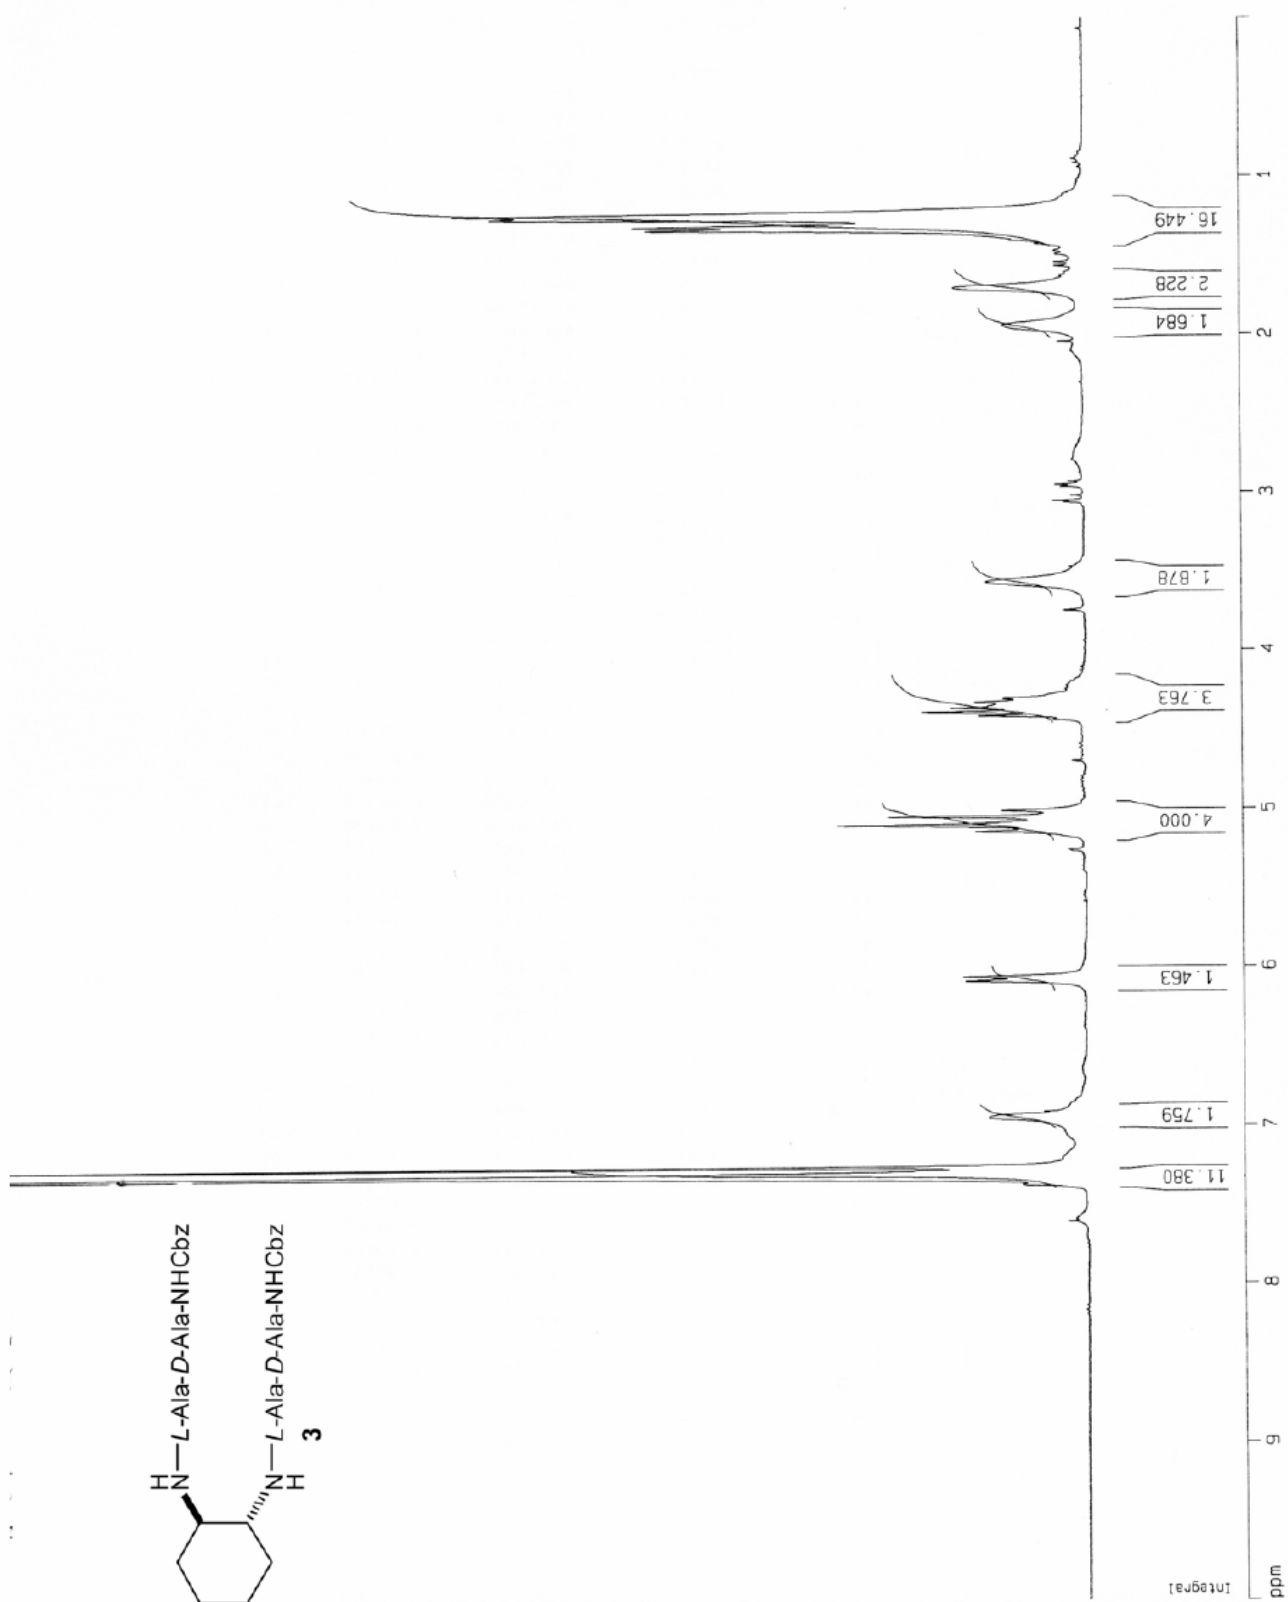

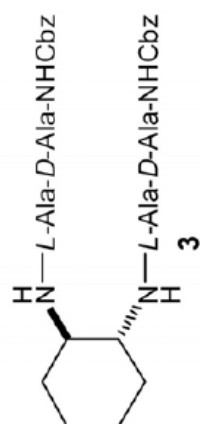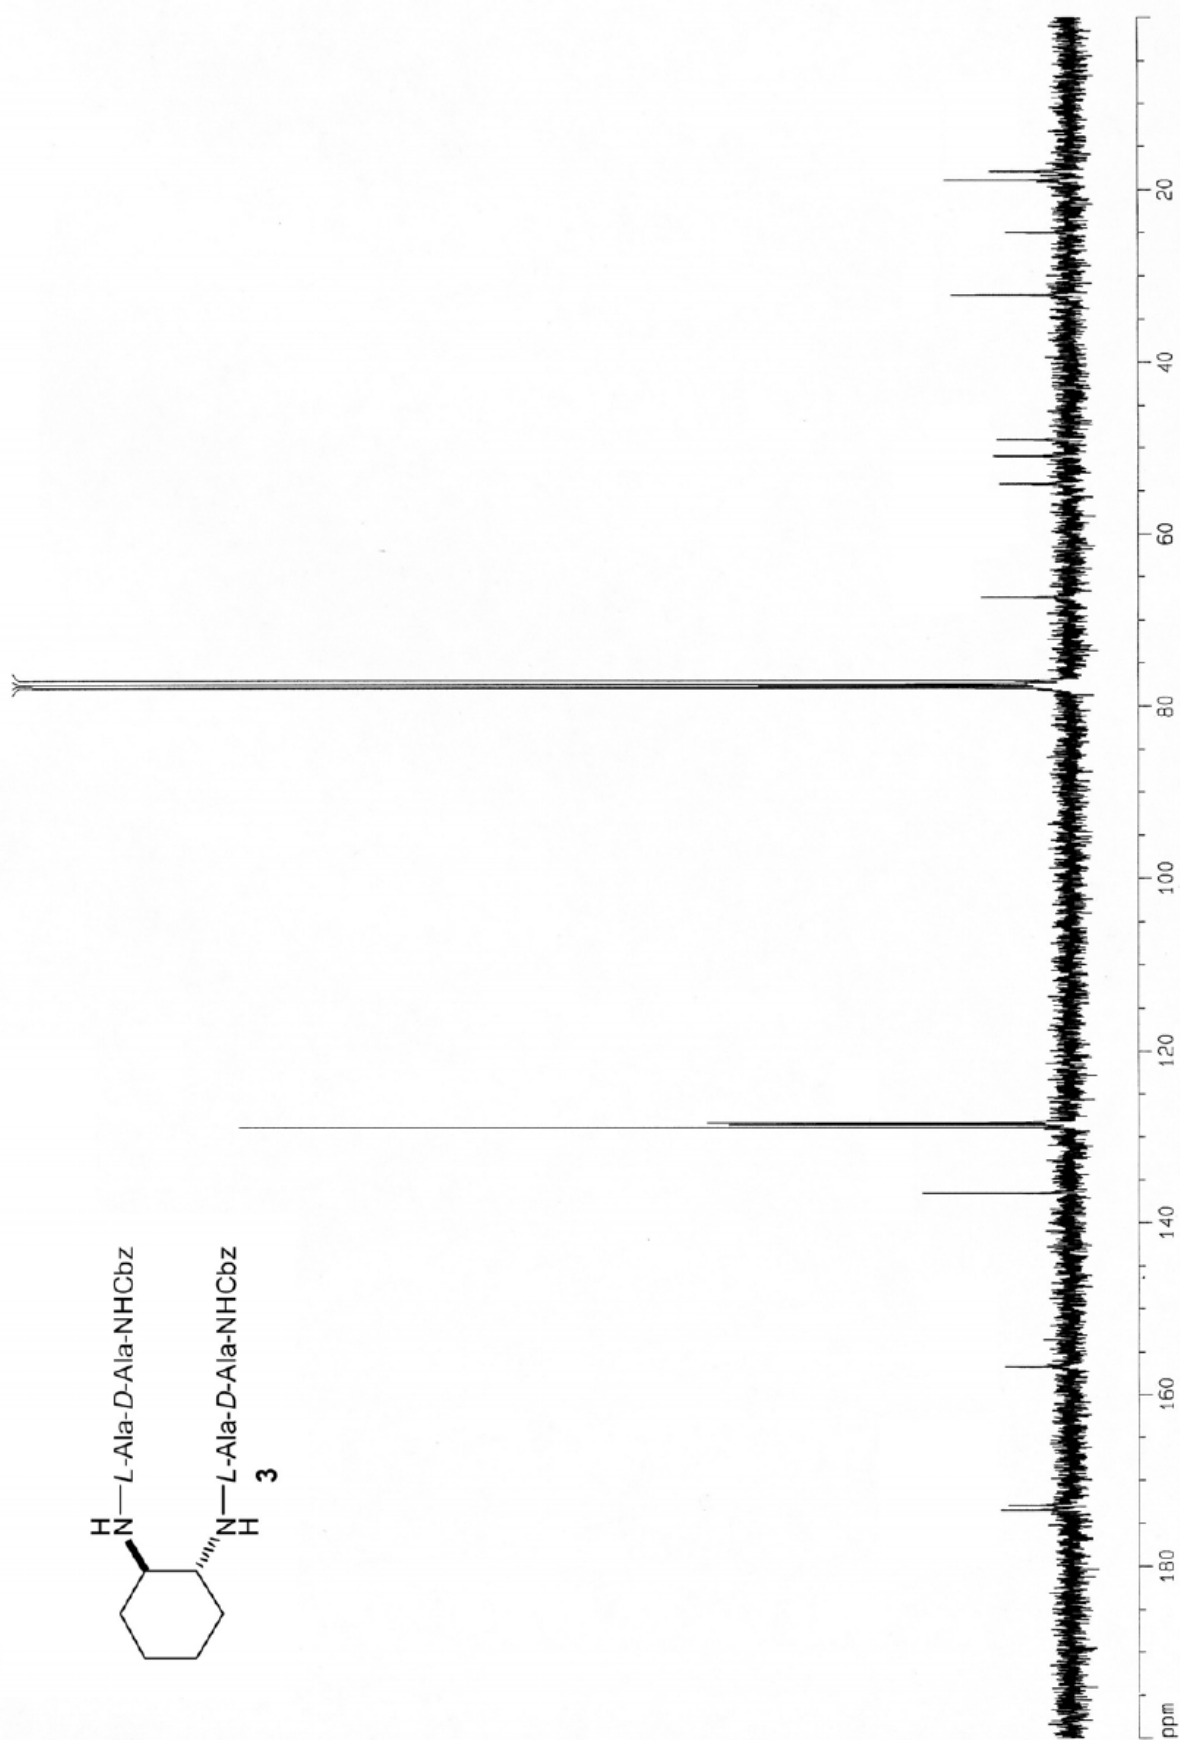

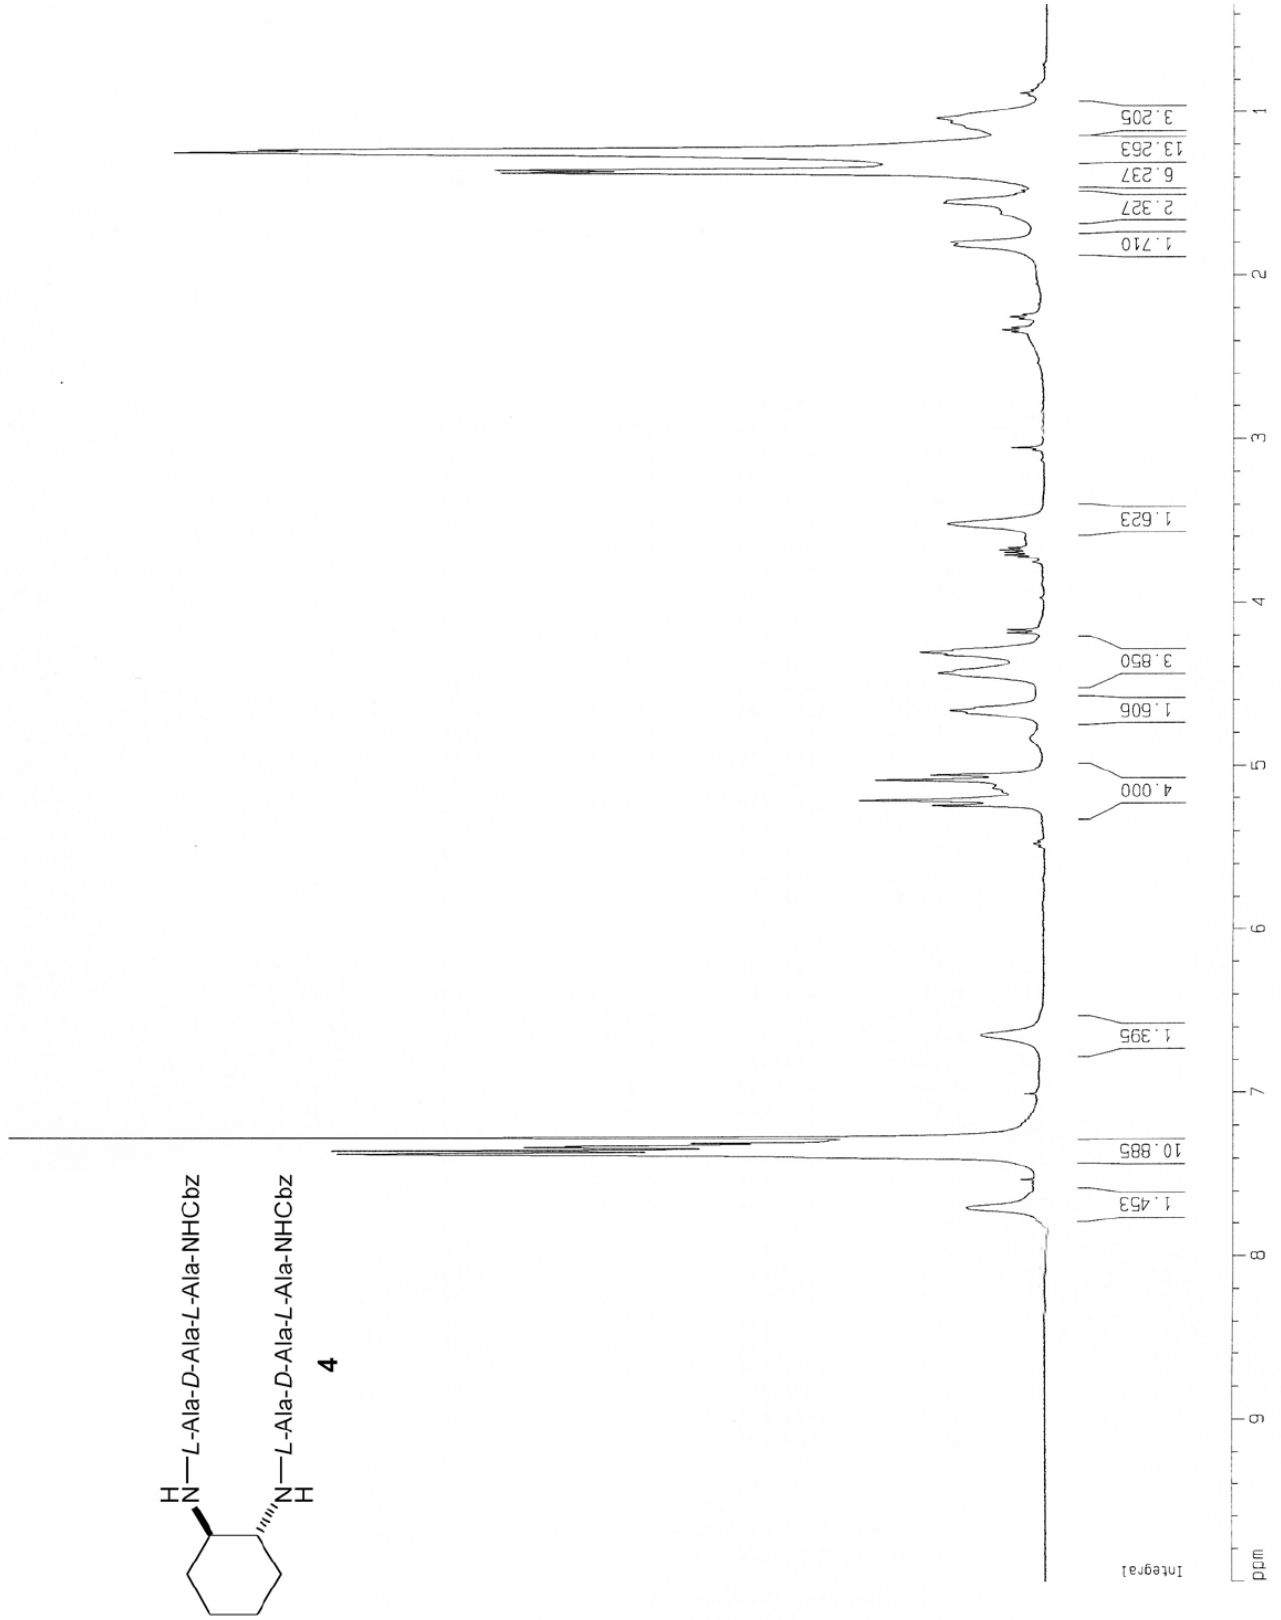

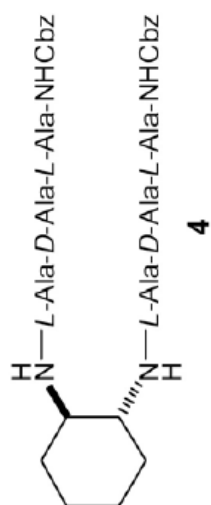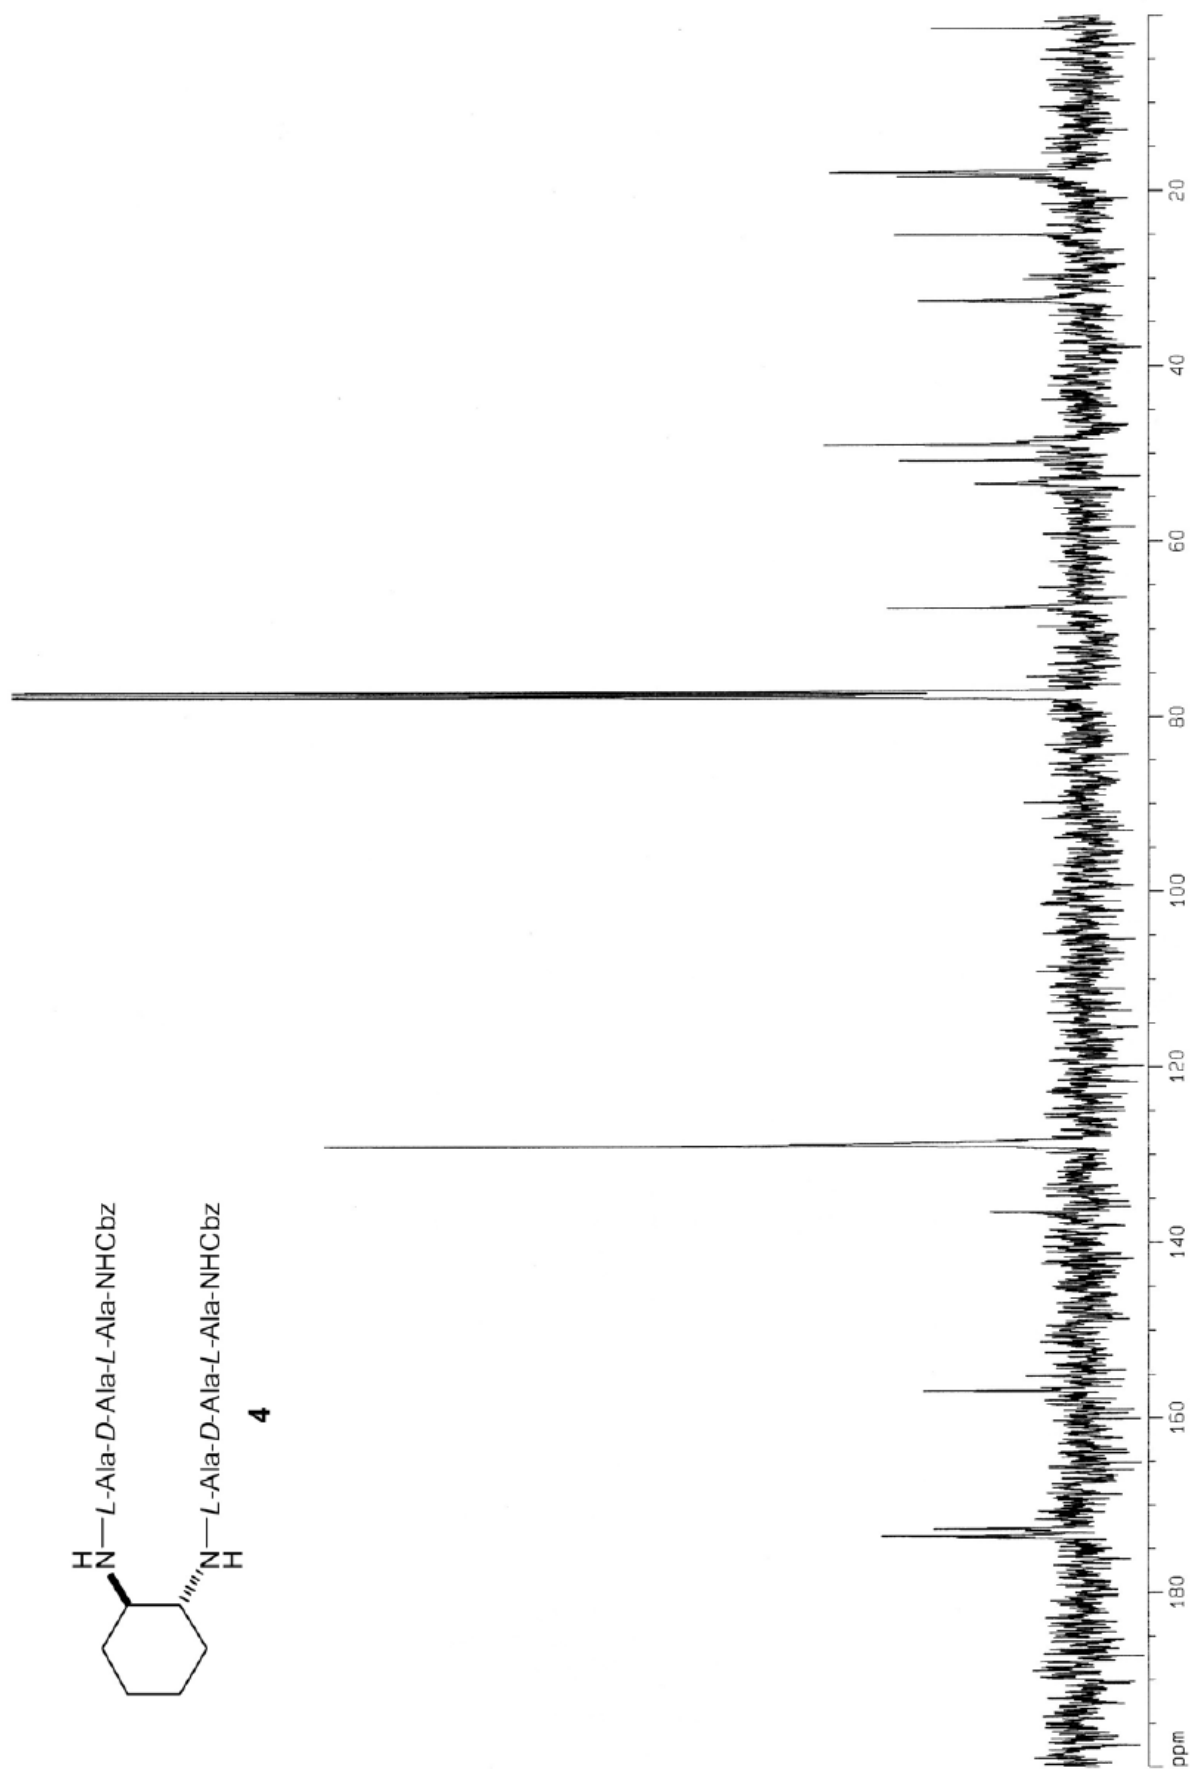

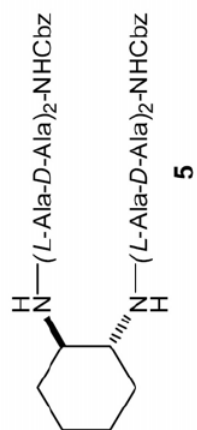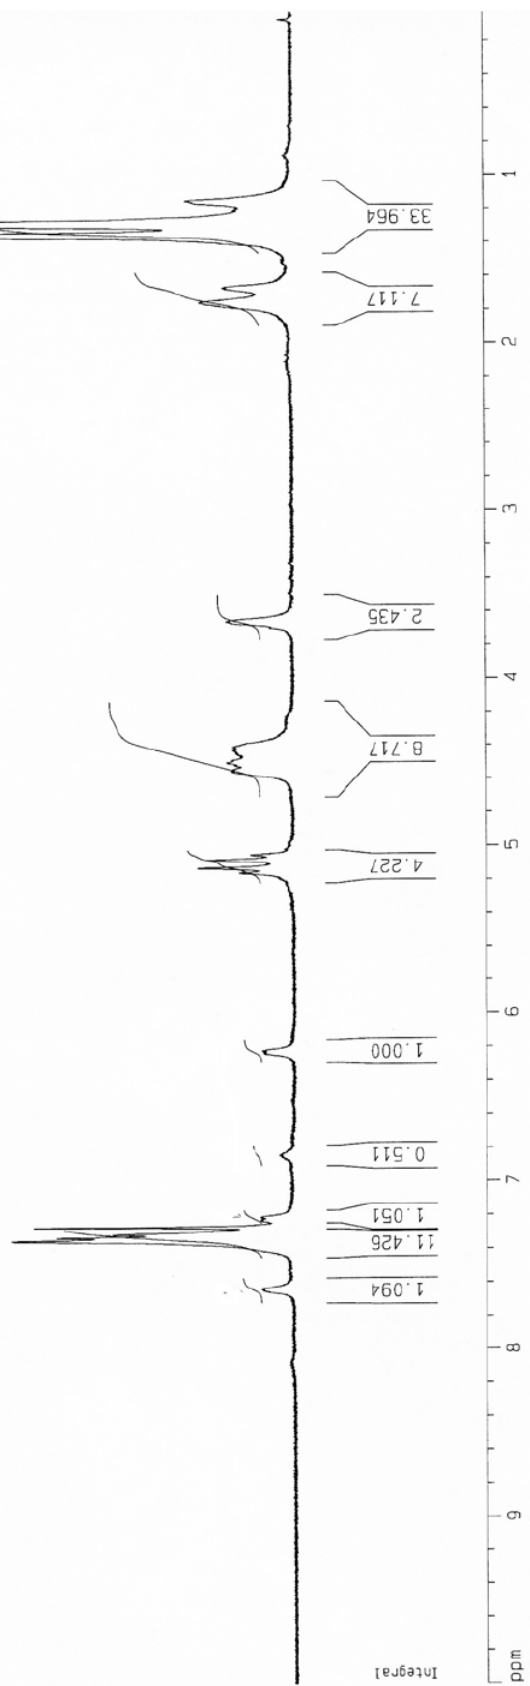

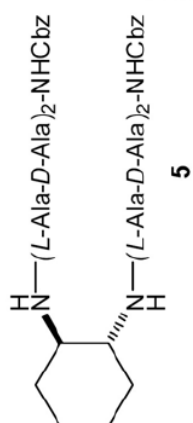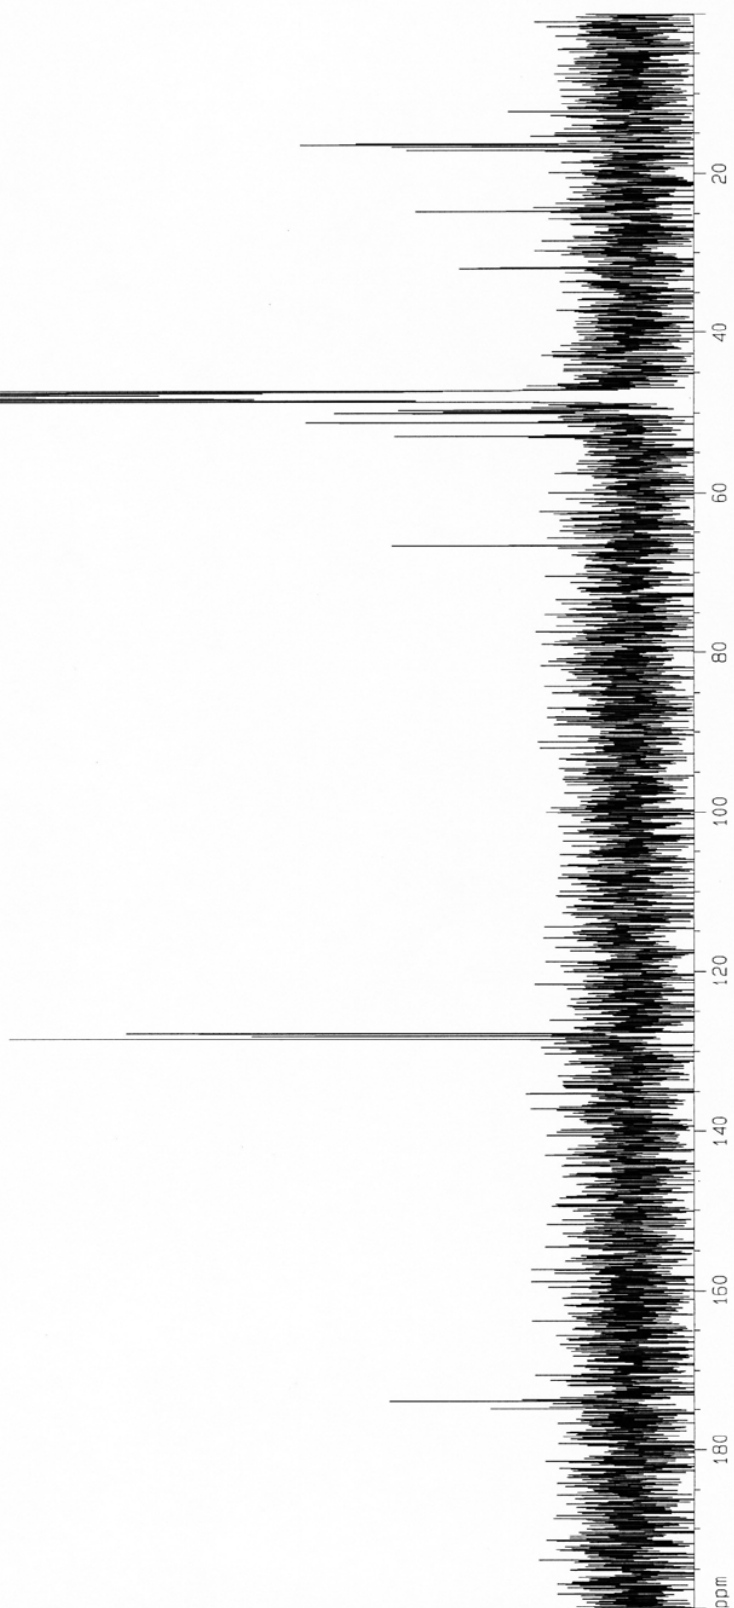

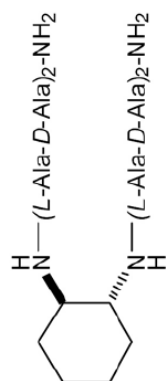

6

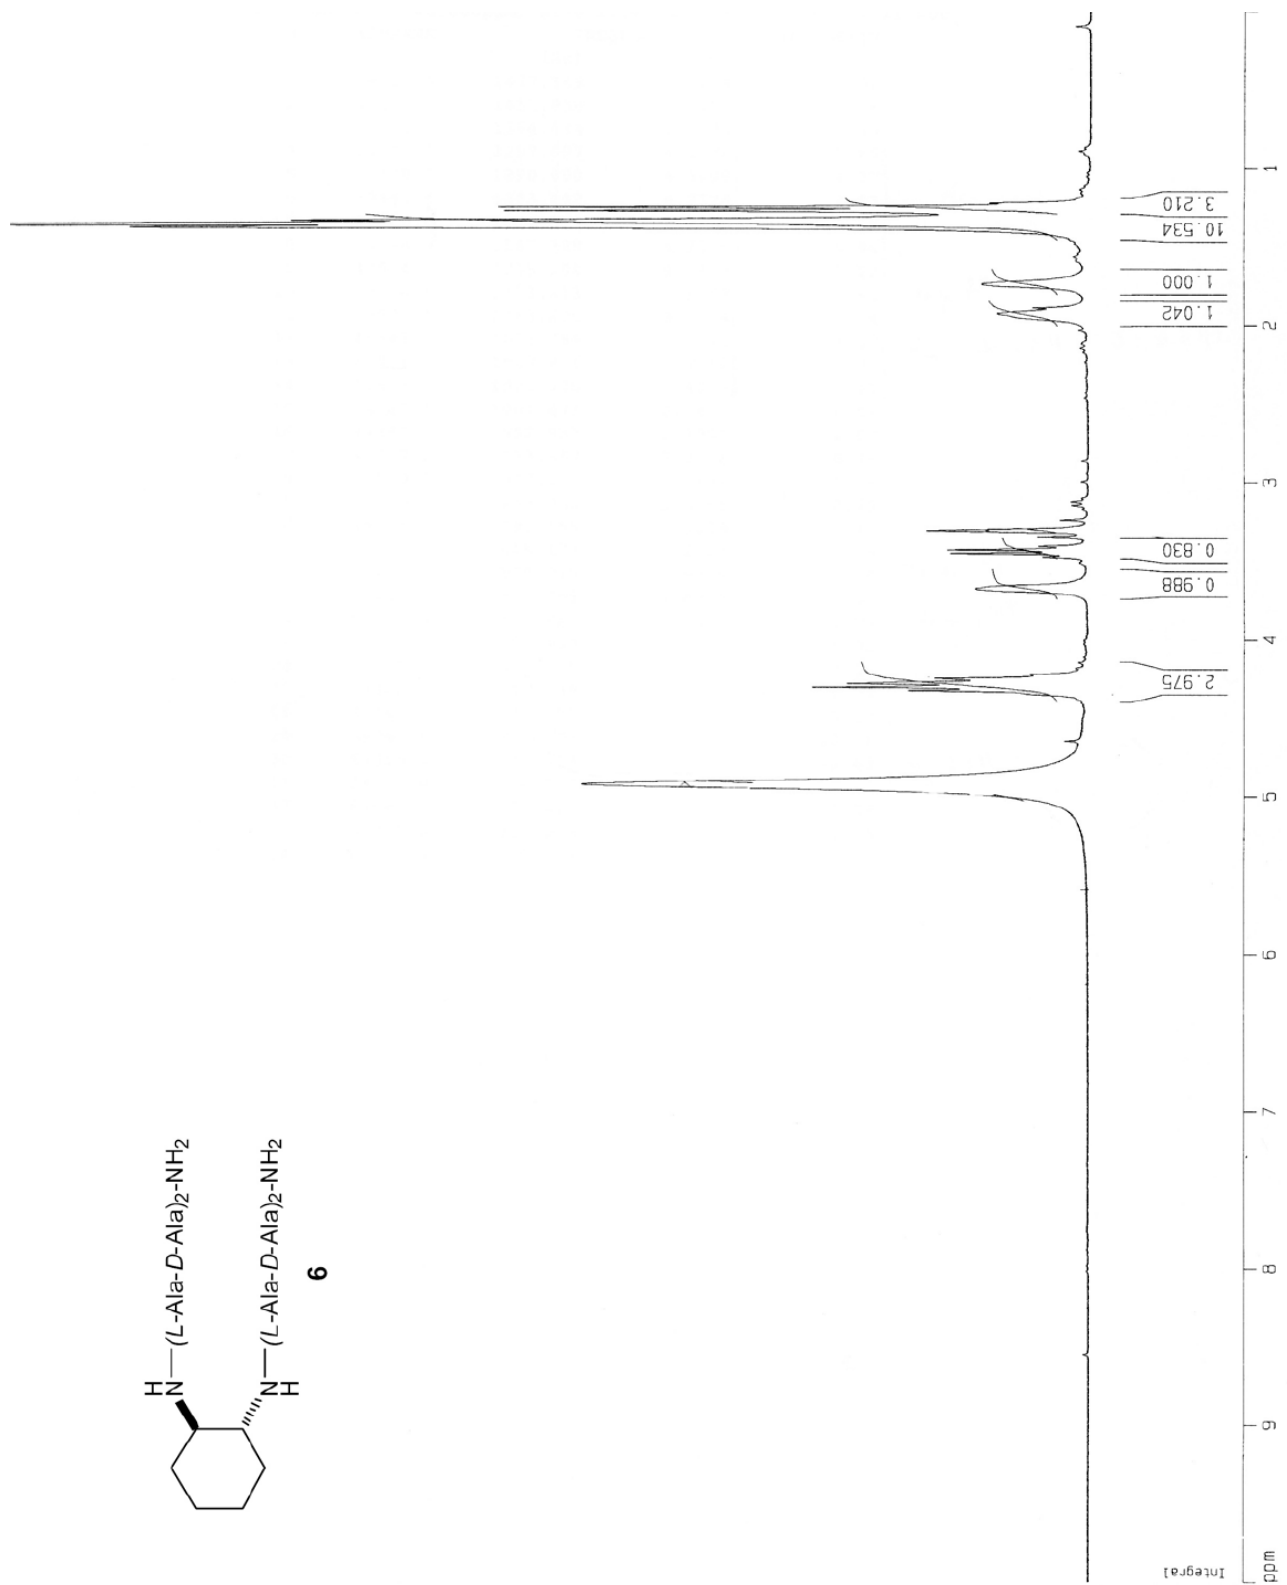



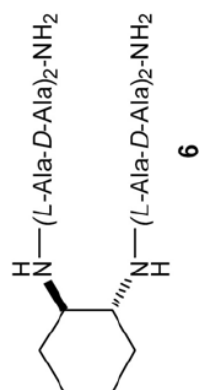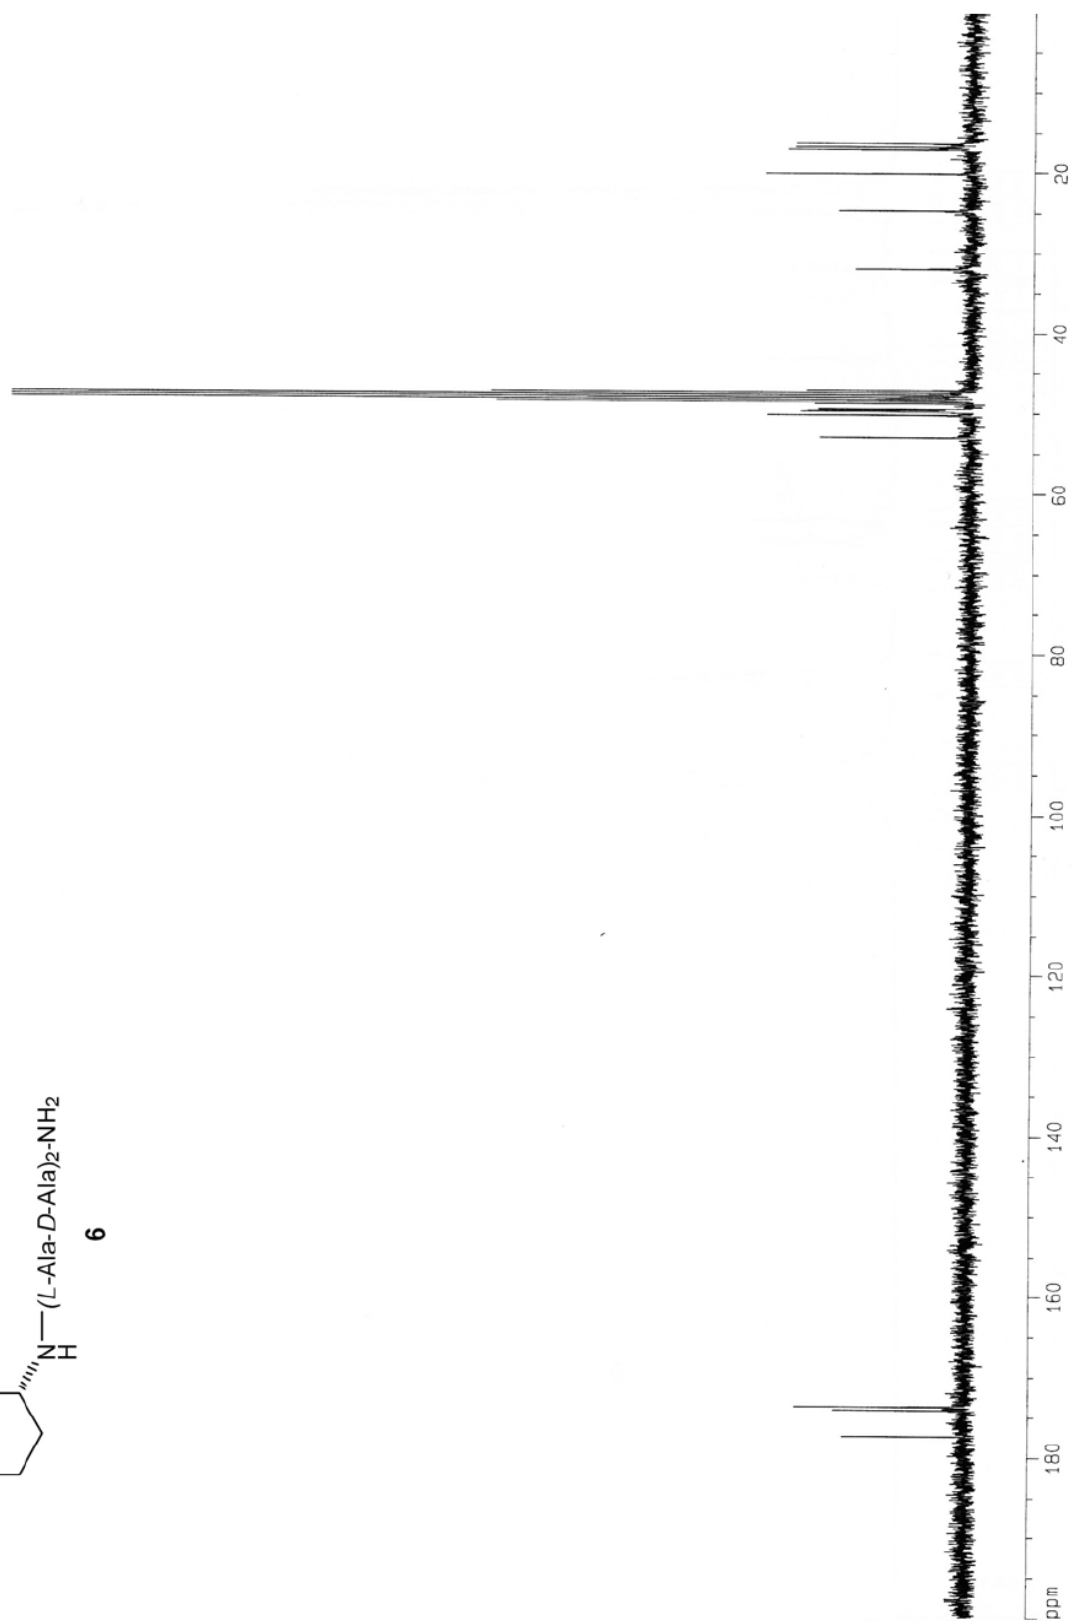

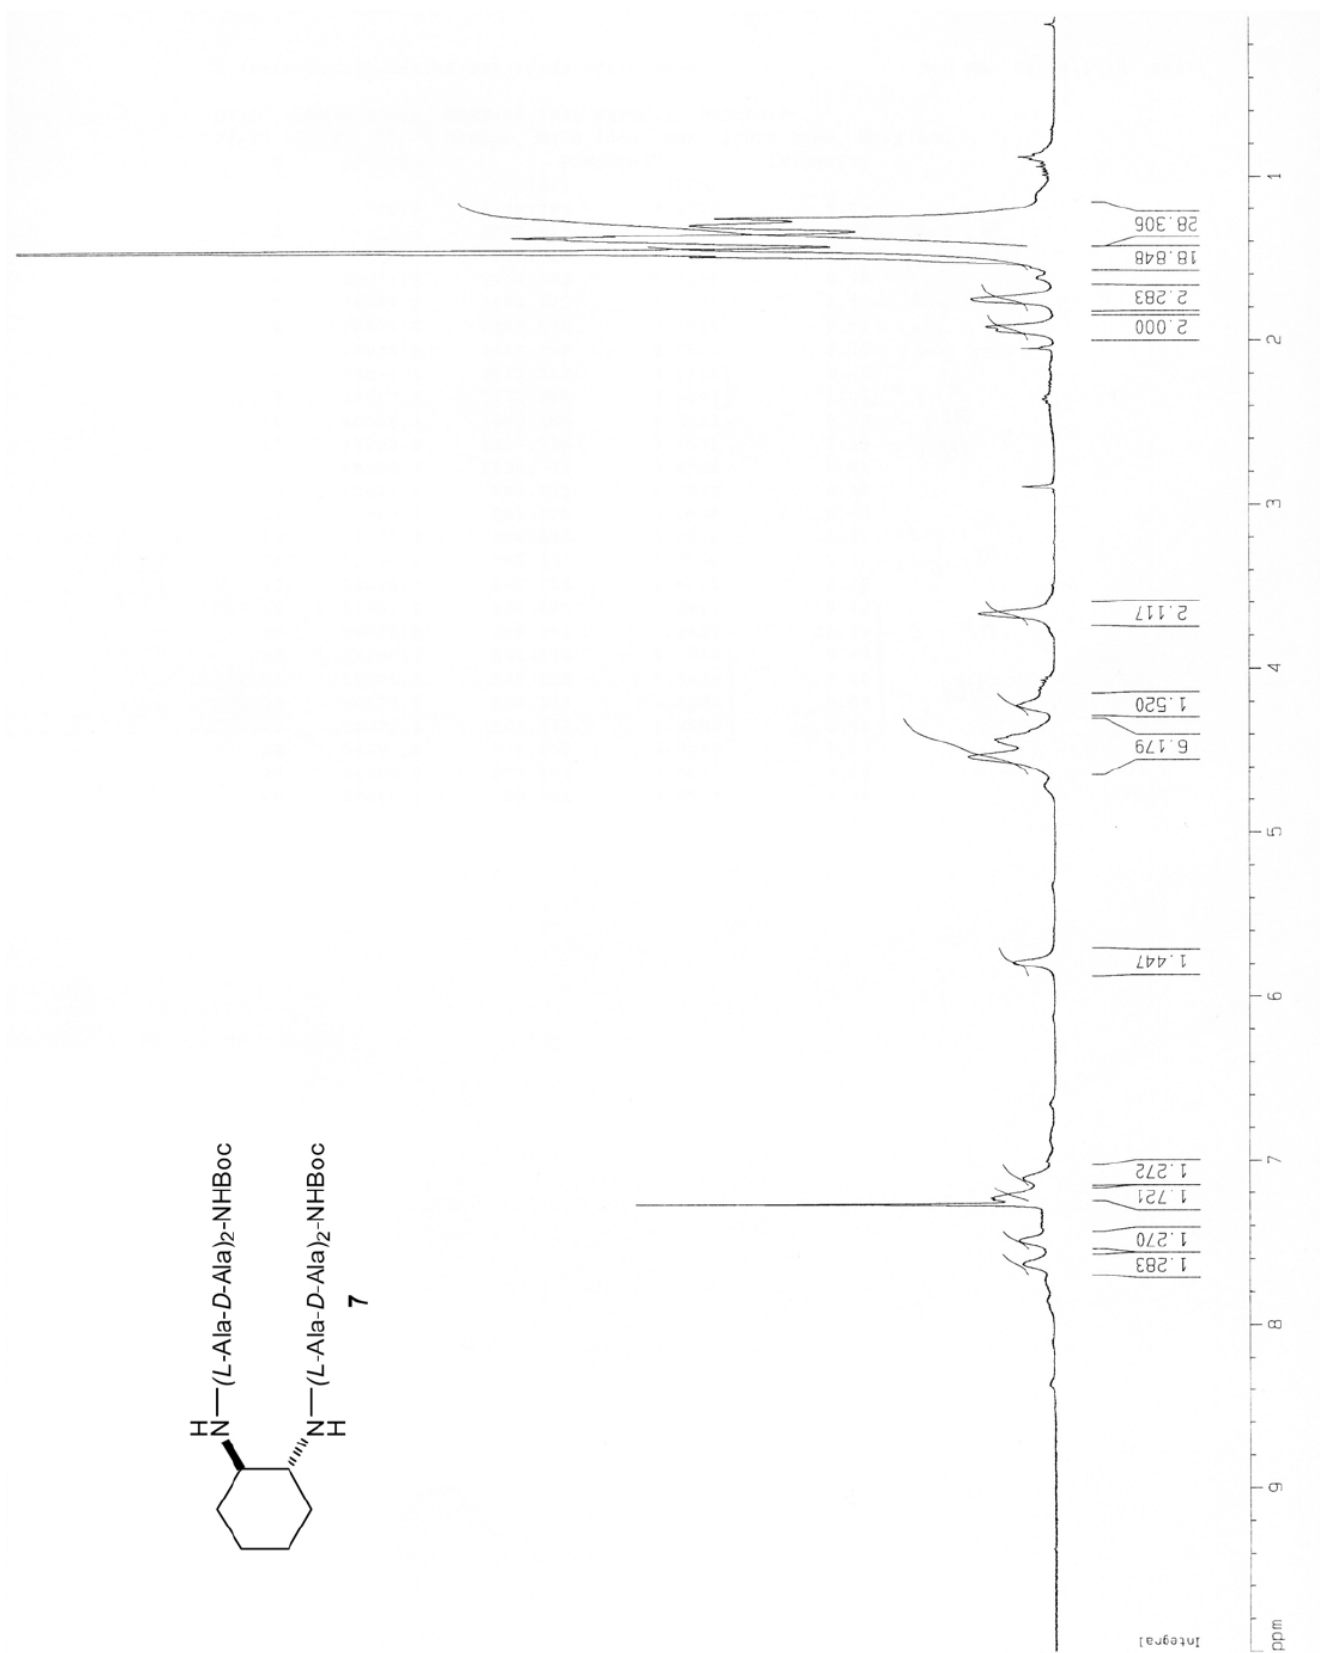

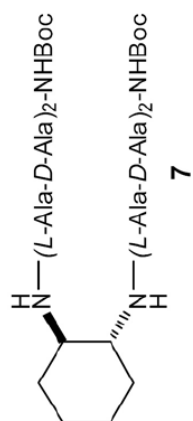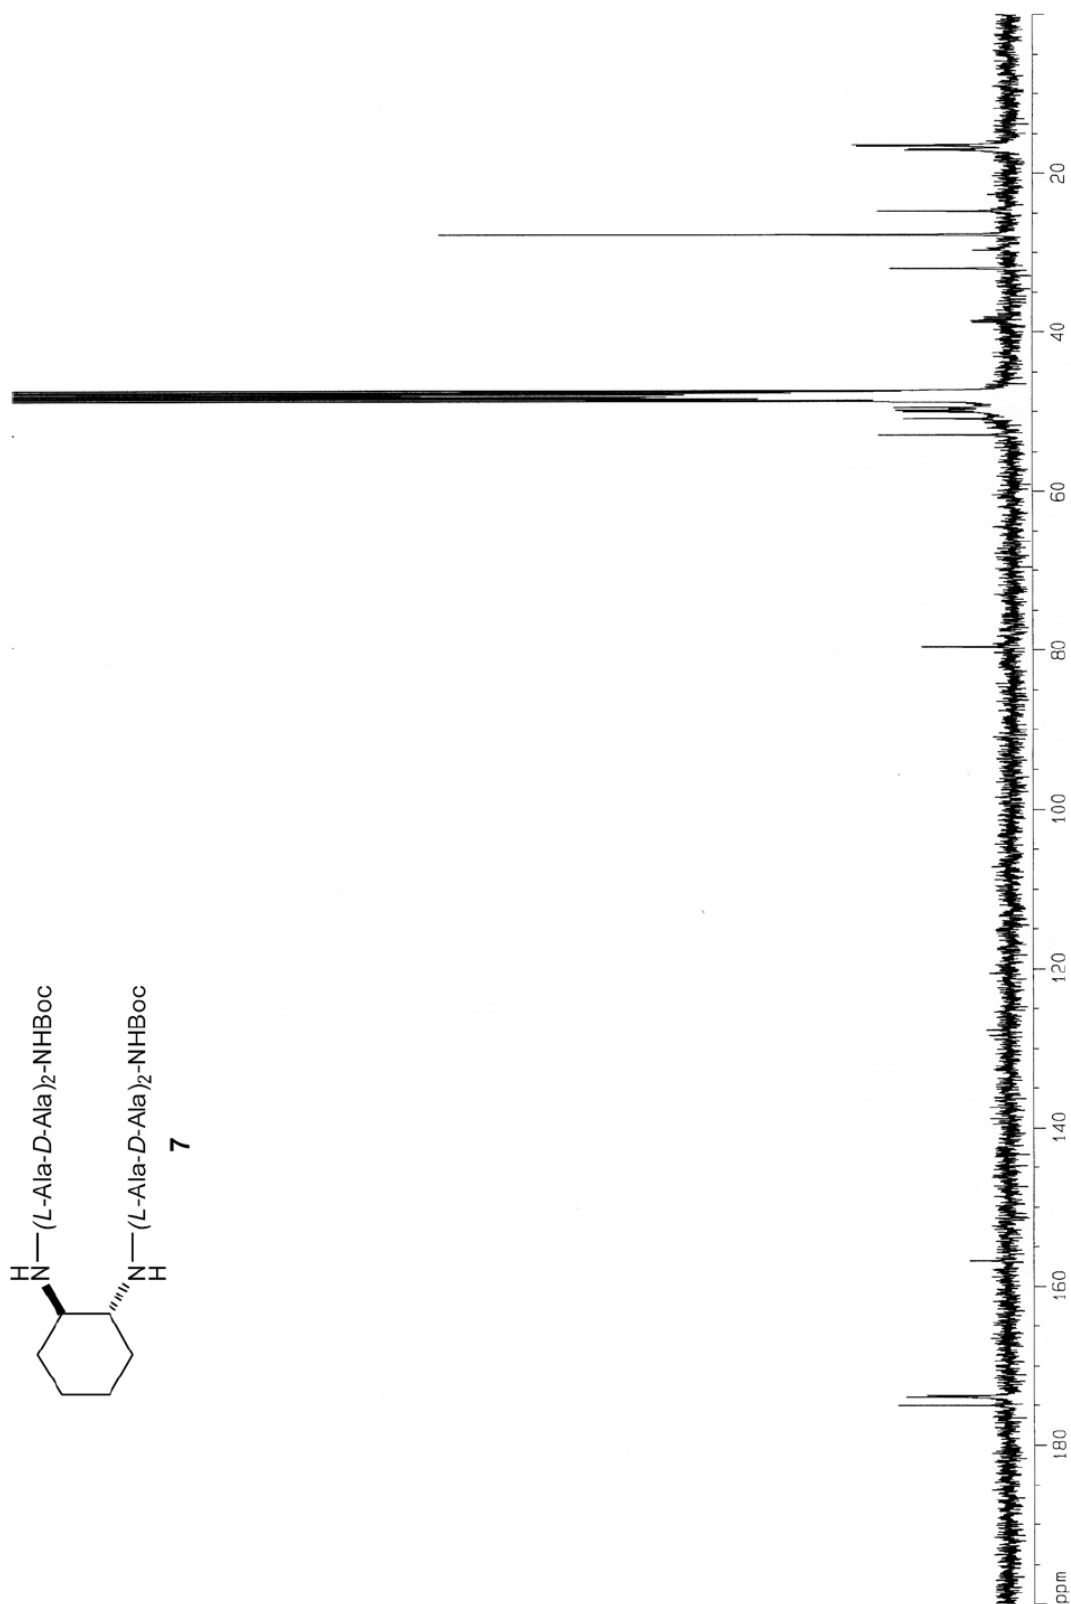

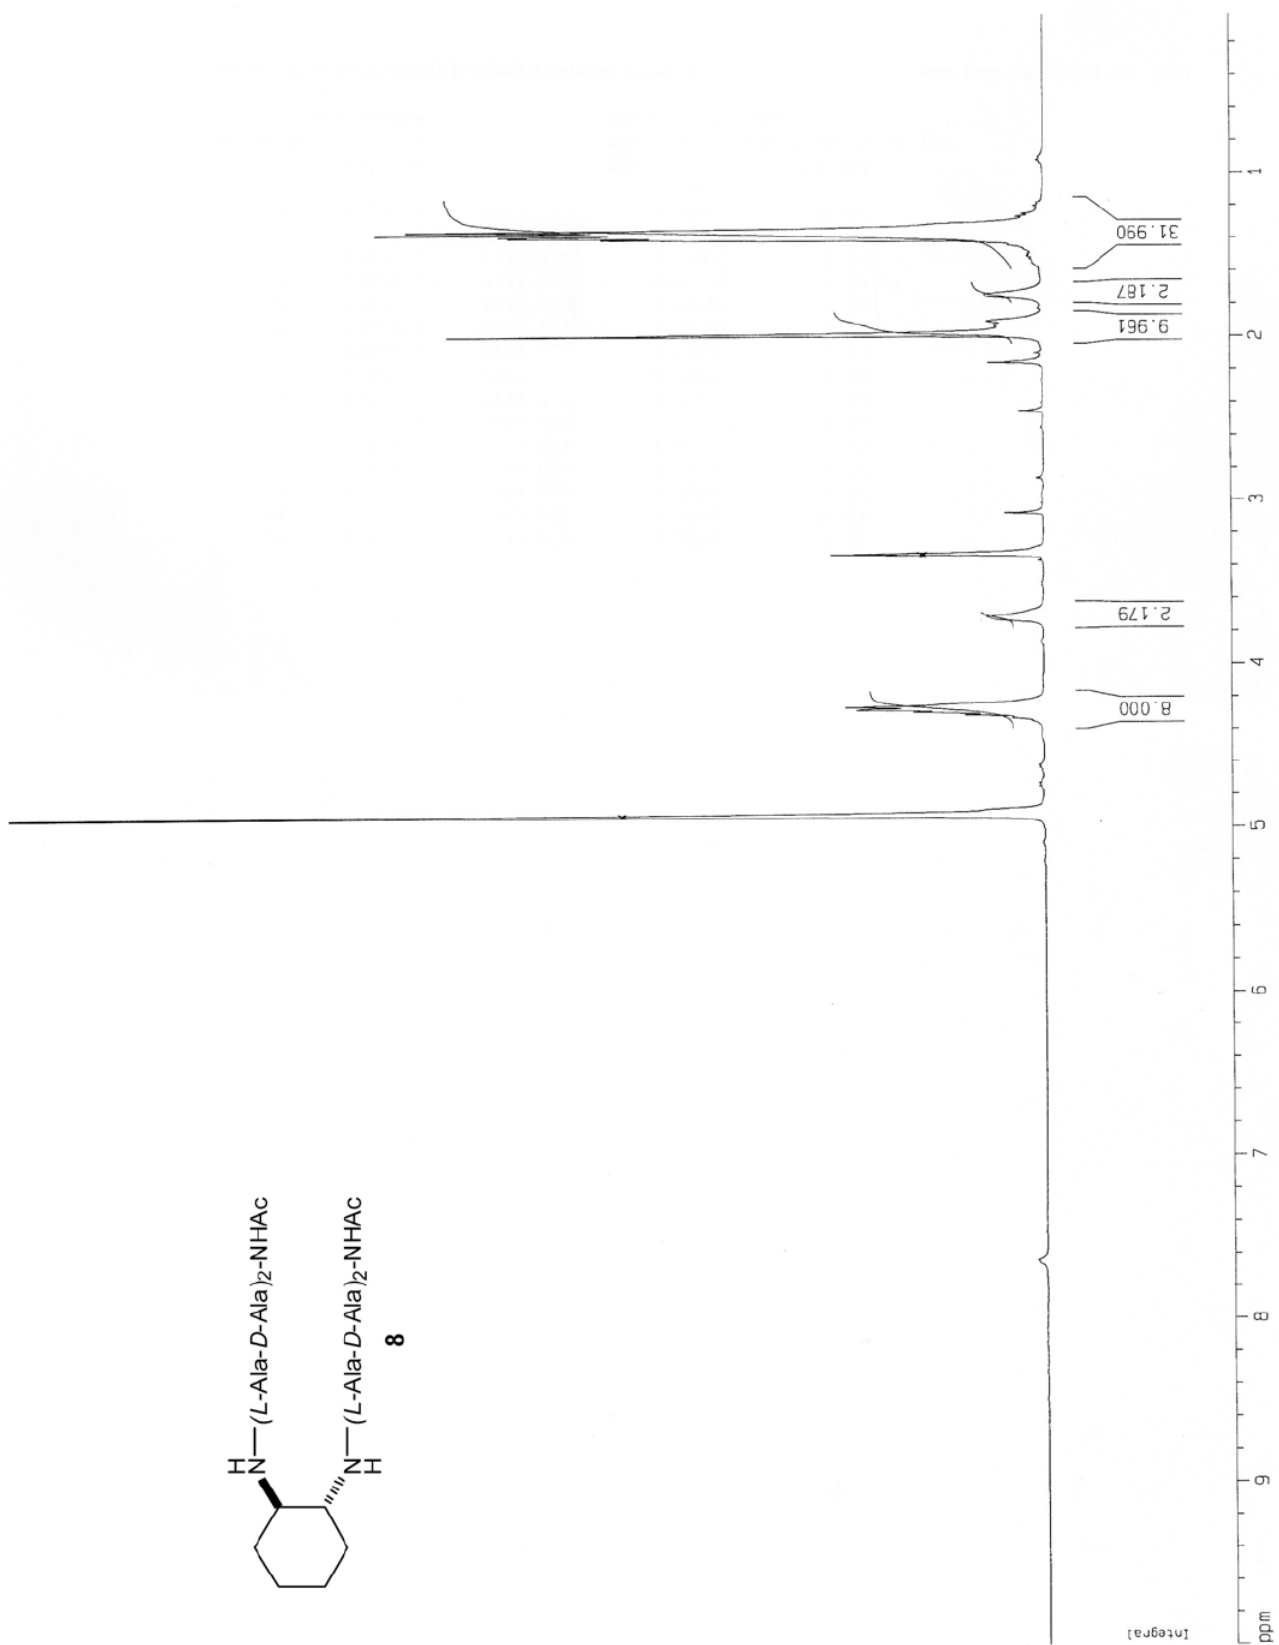

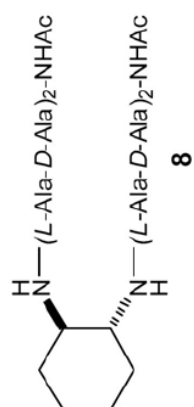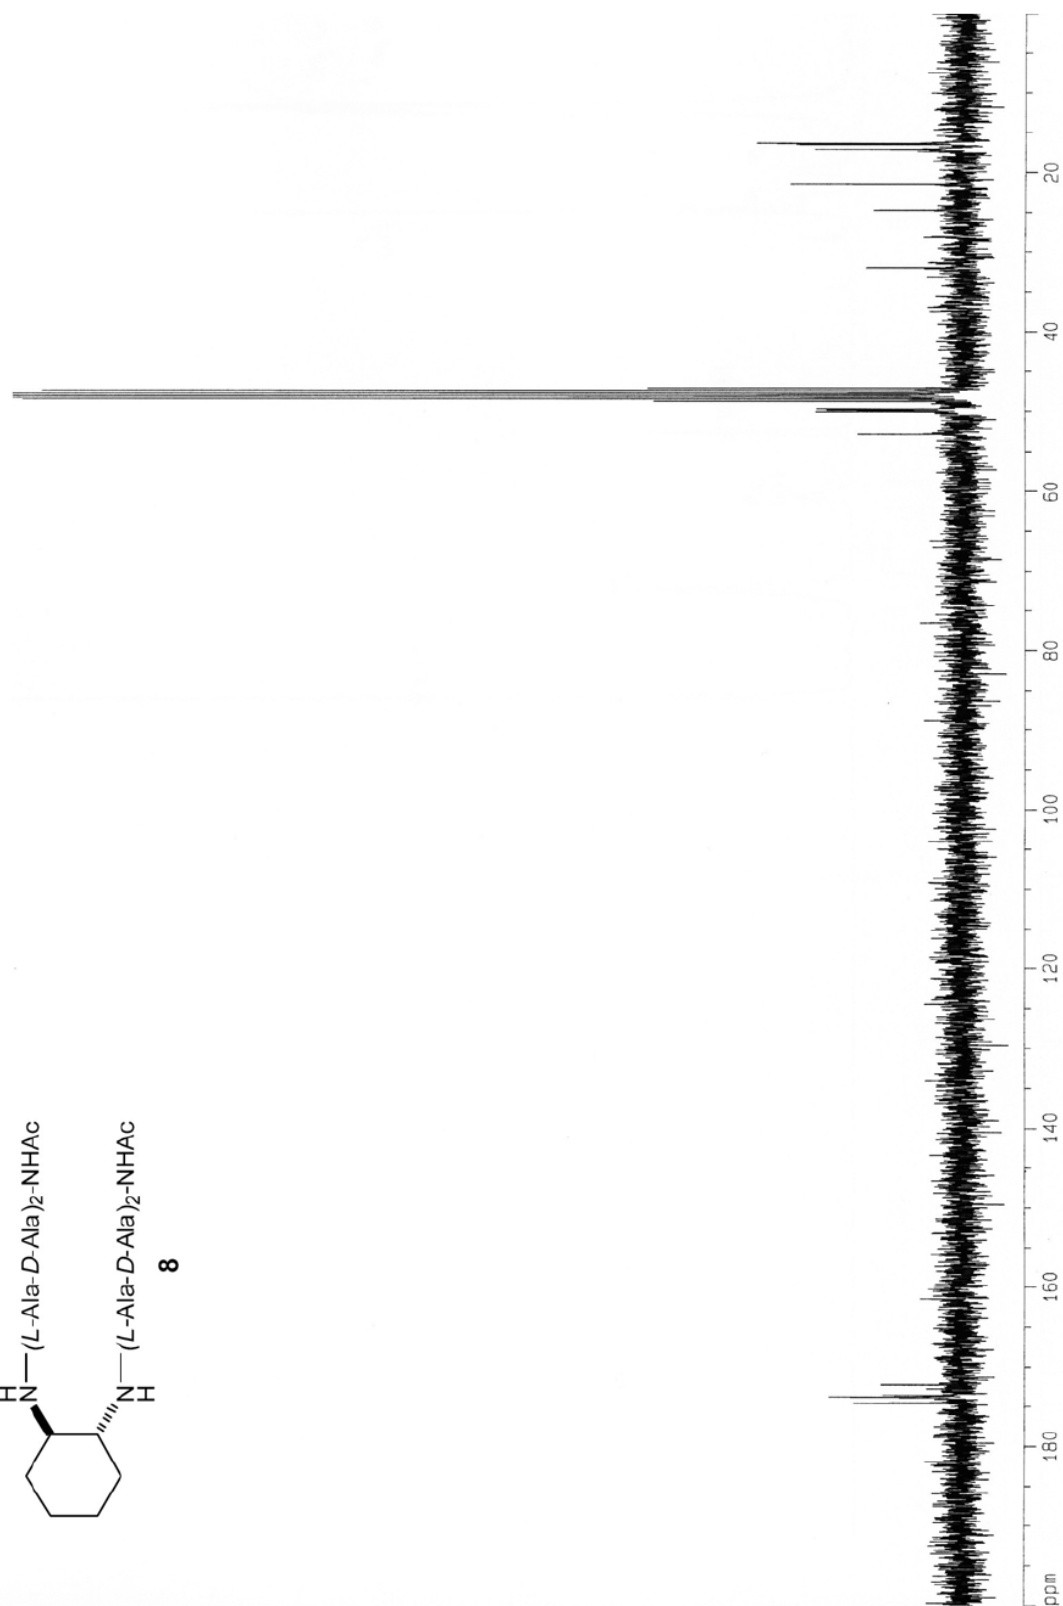

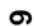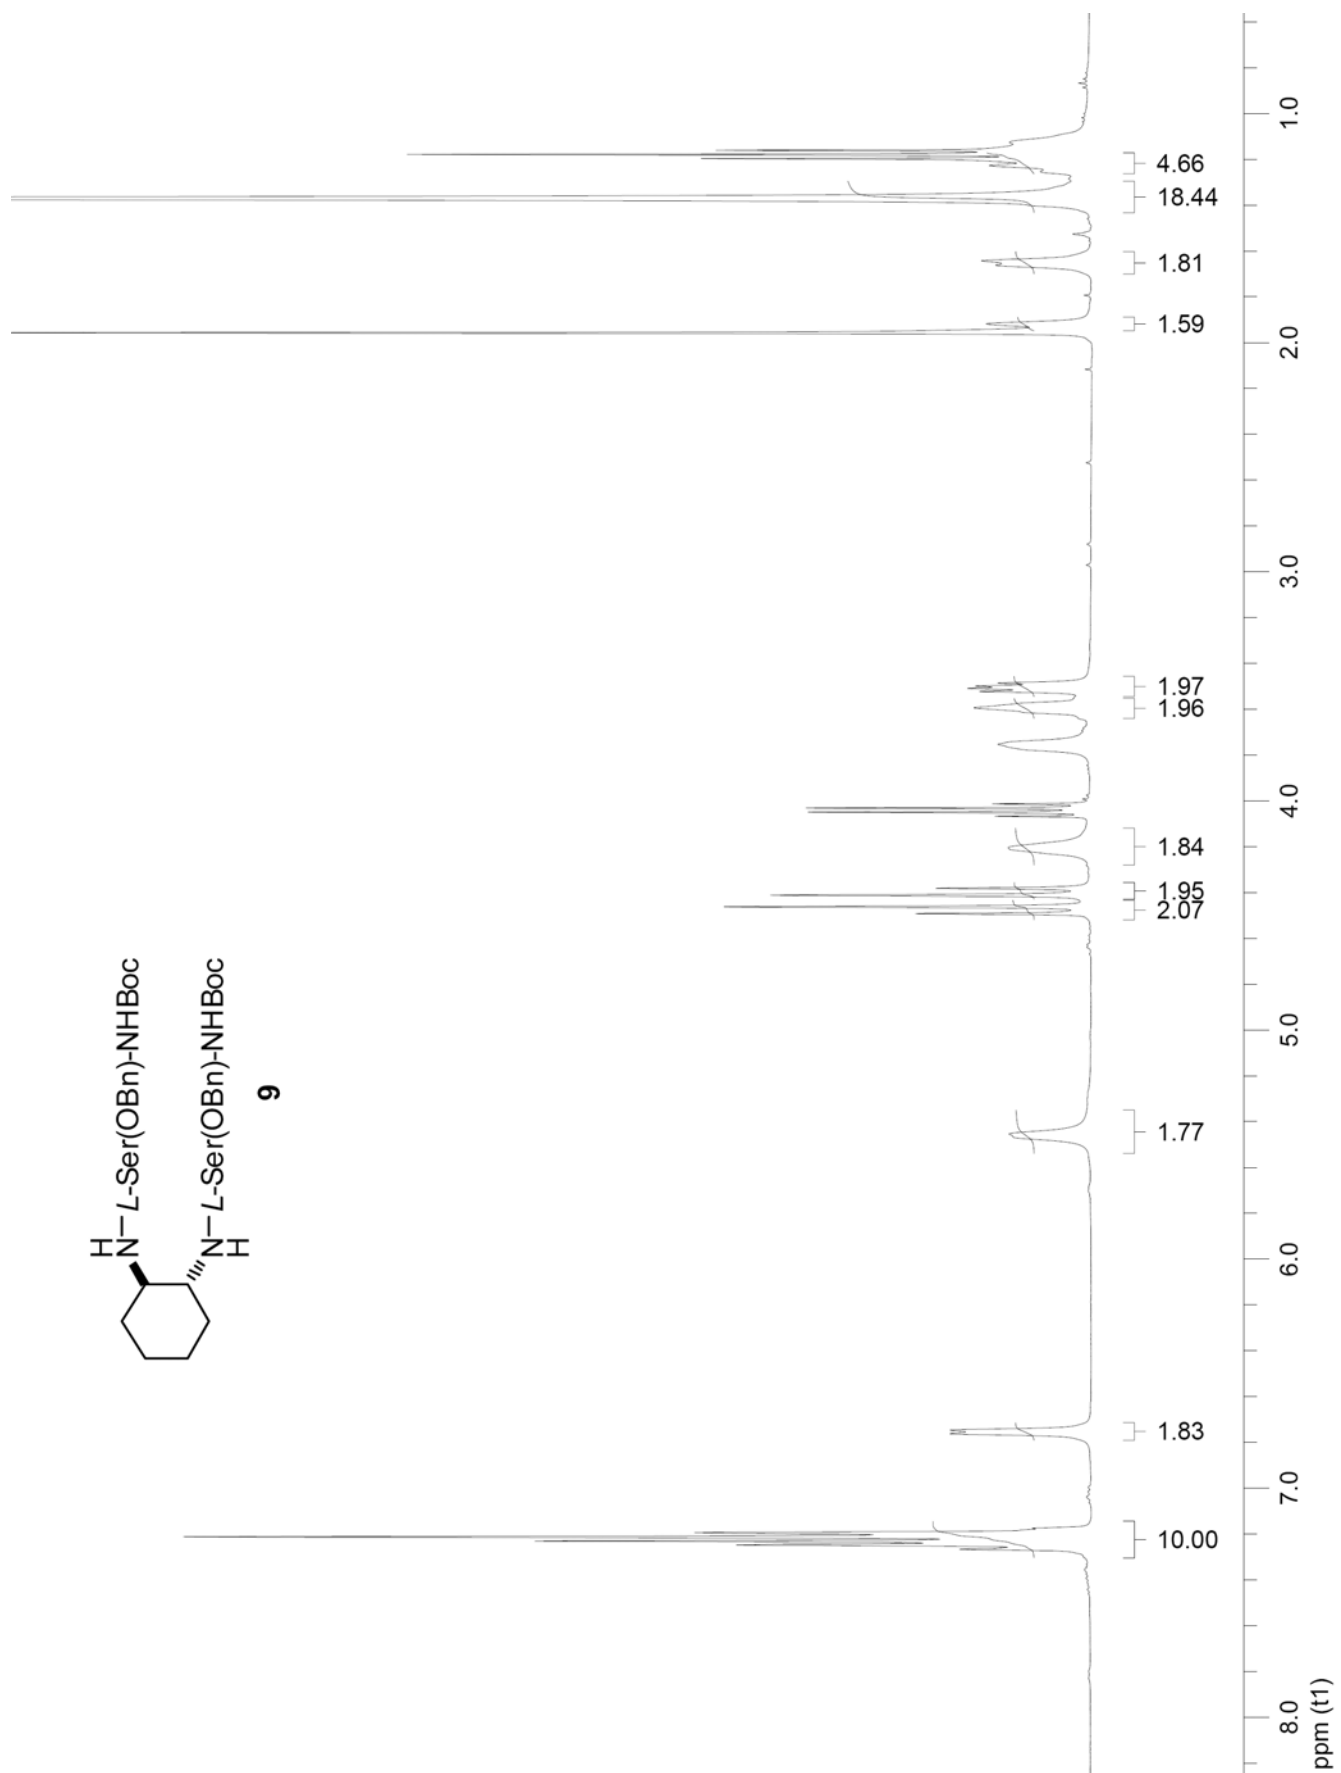

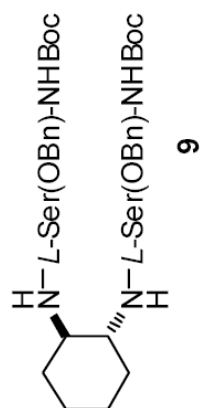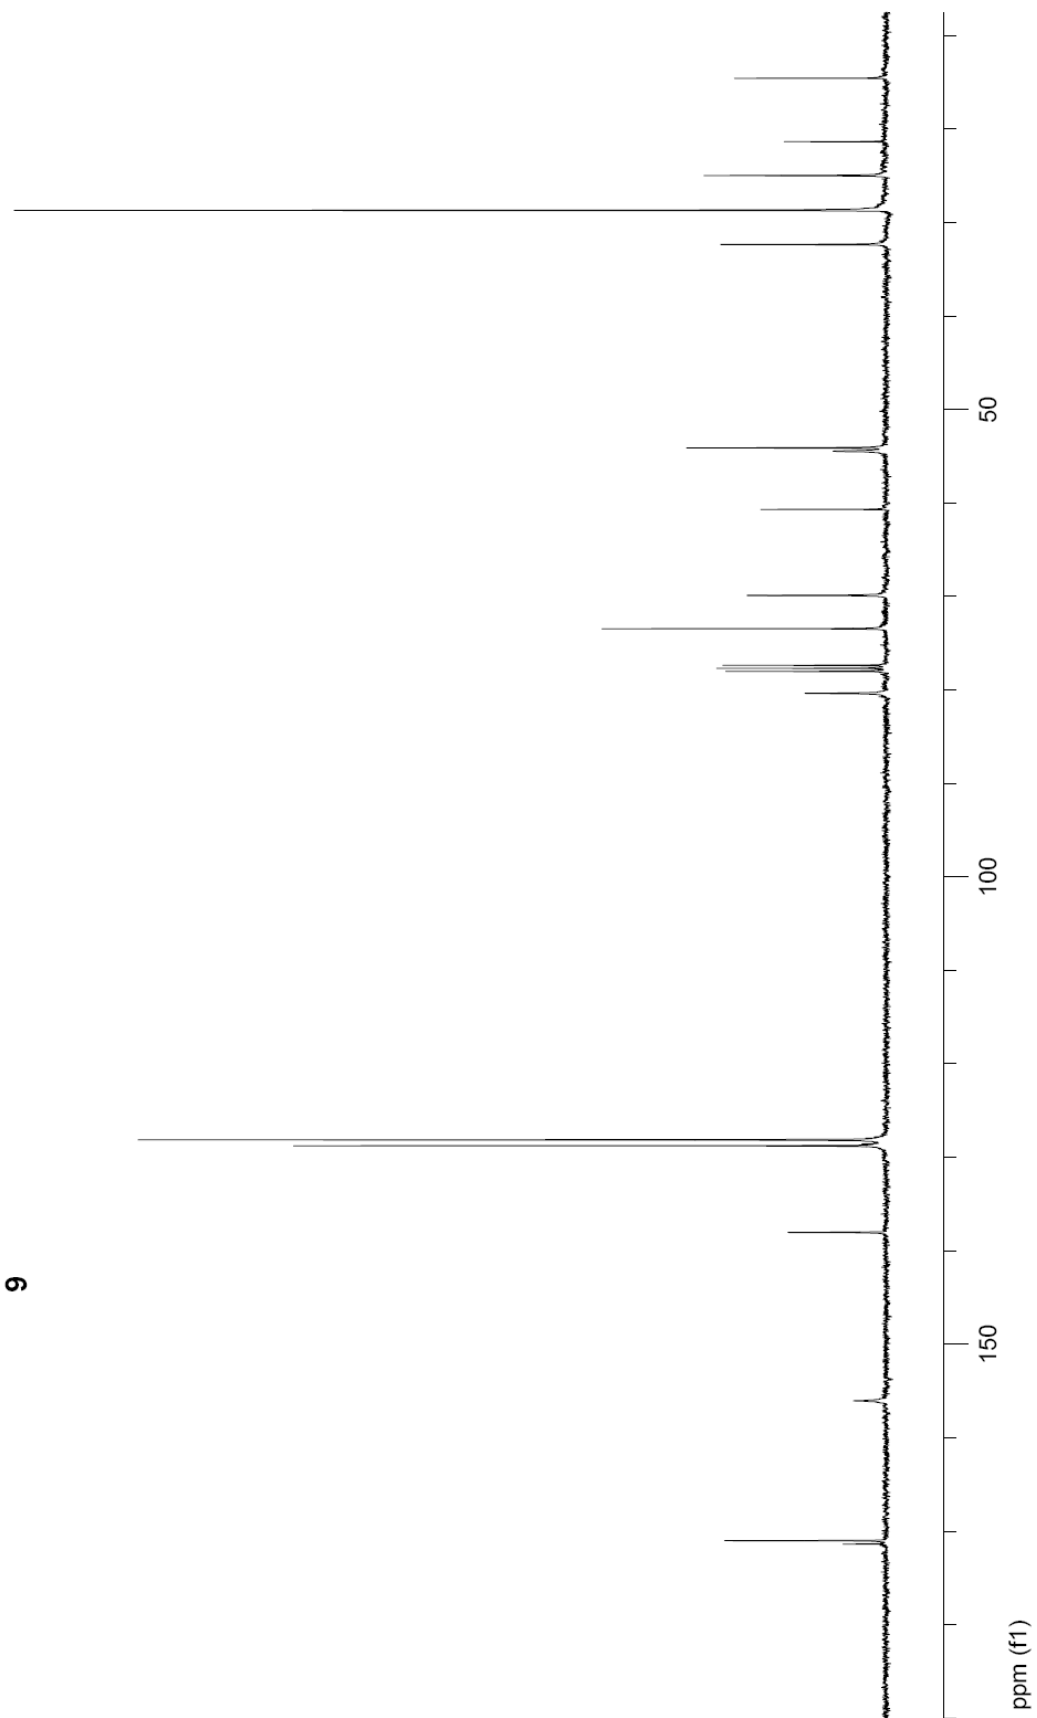

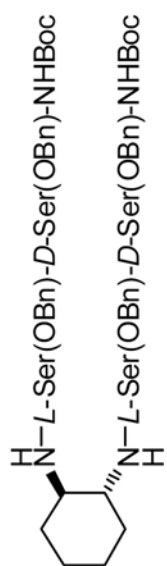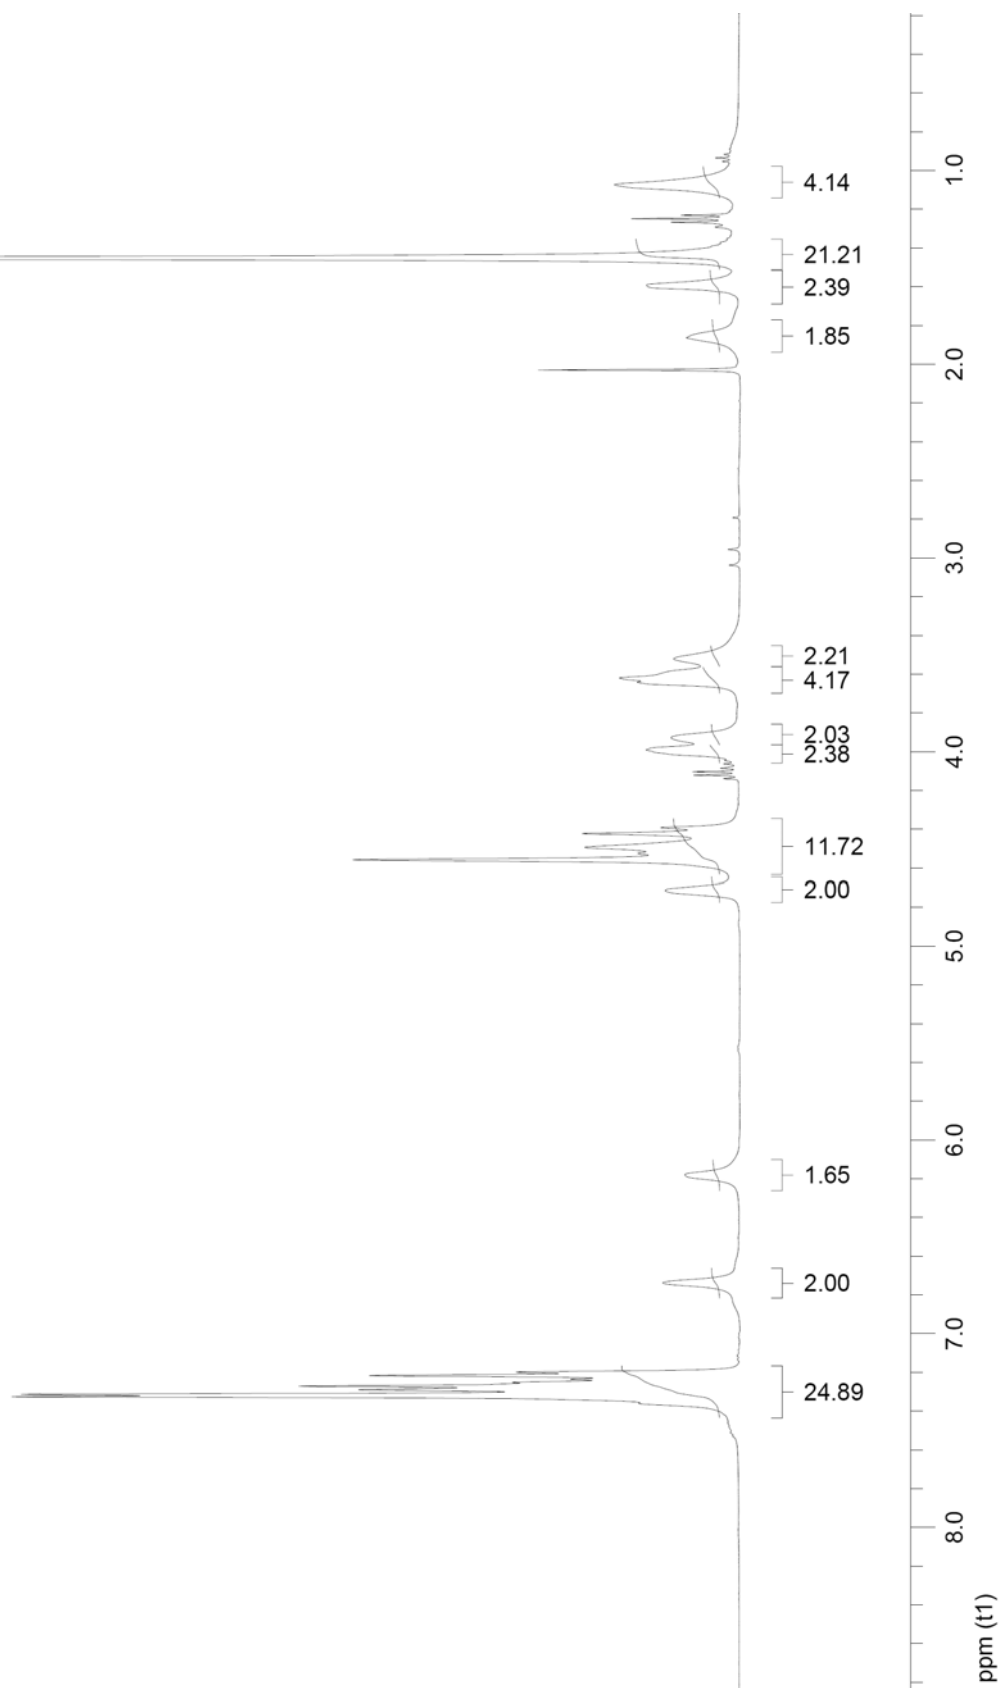



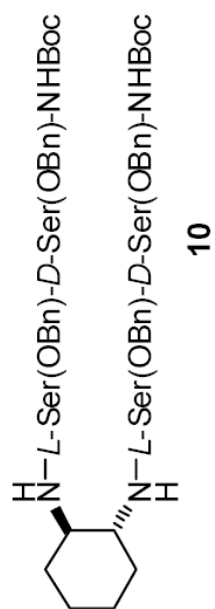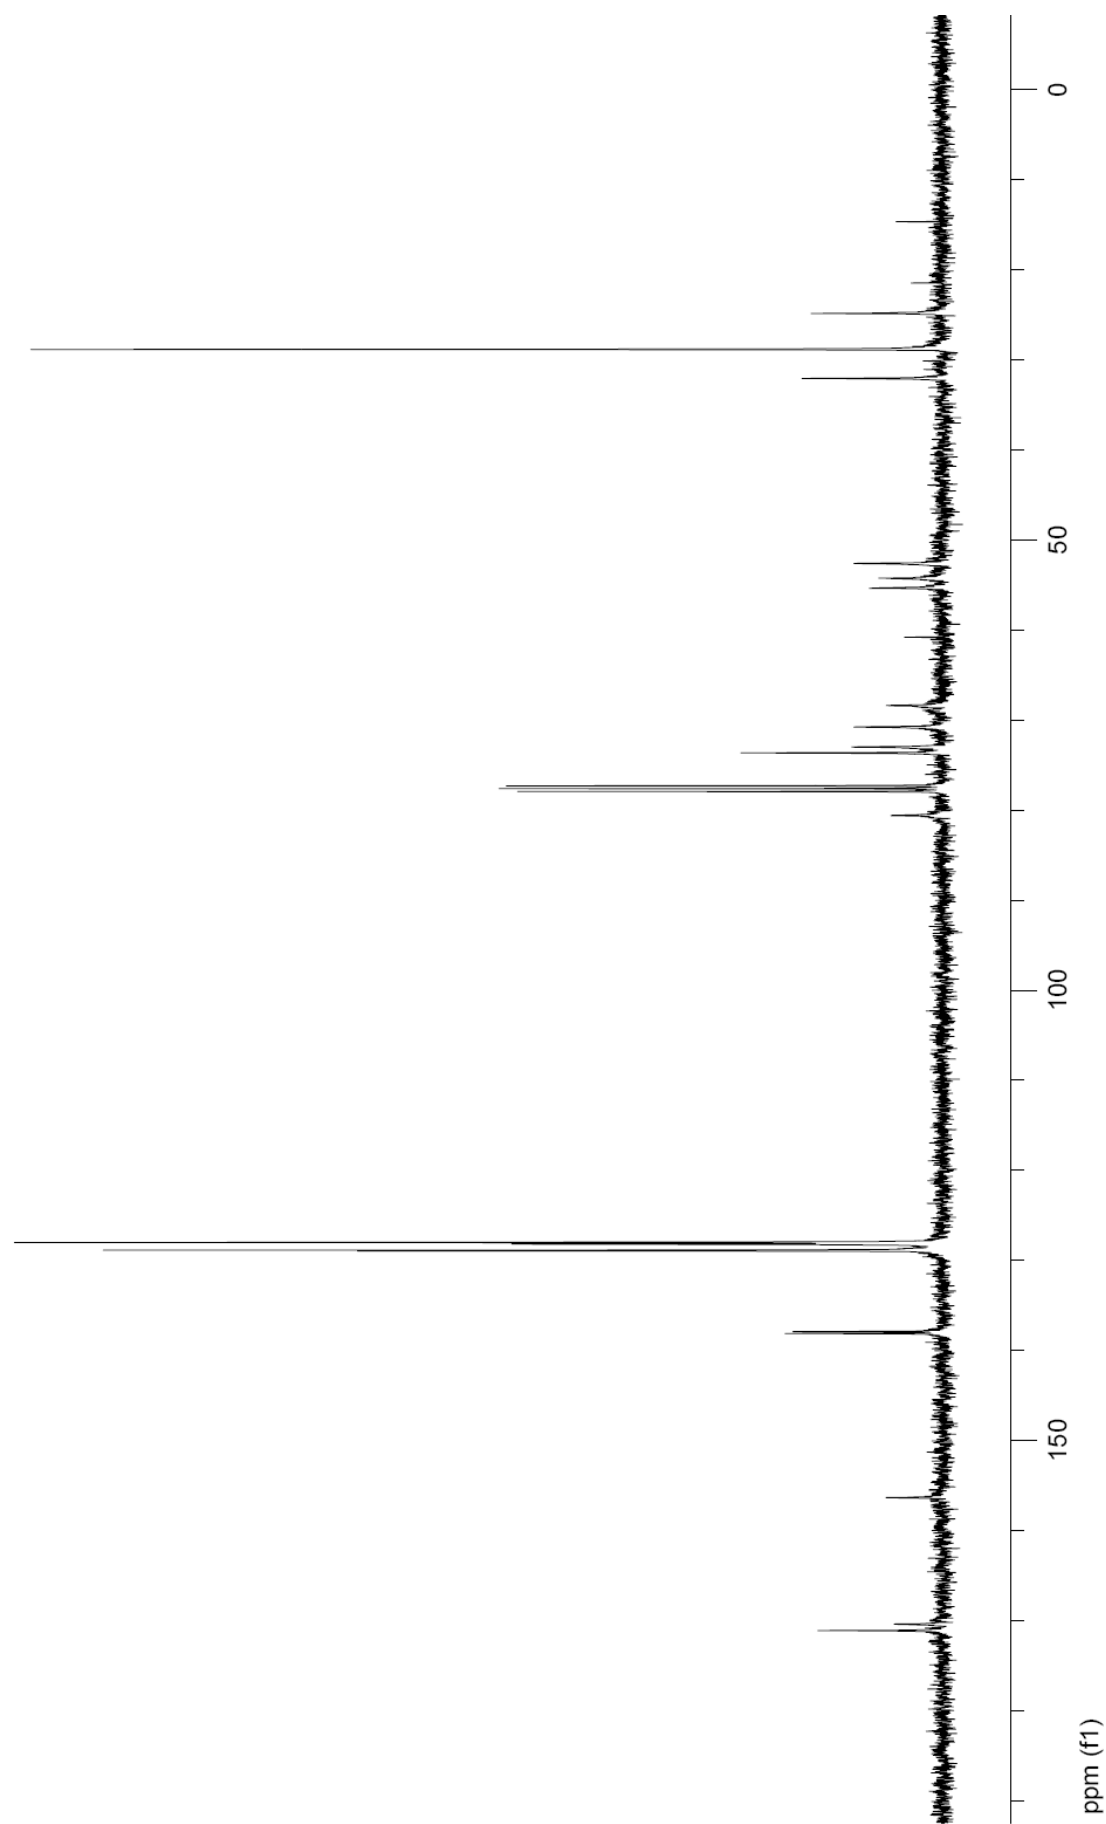

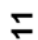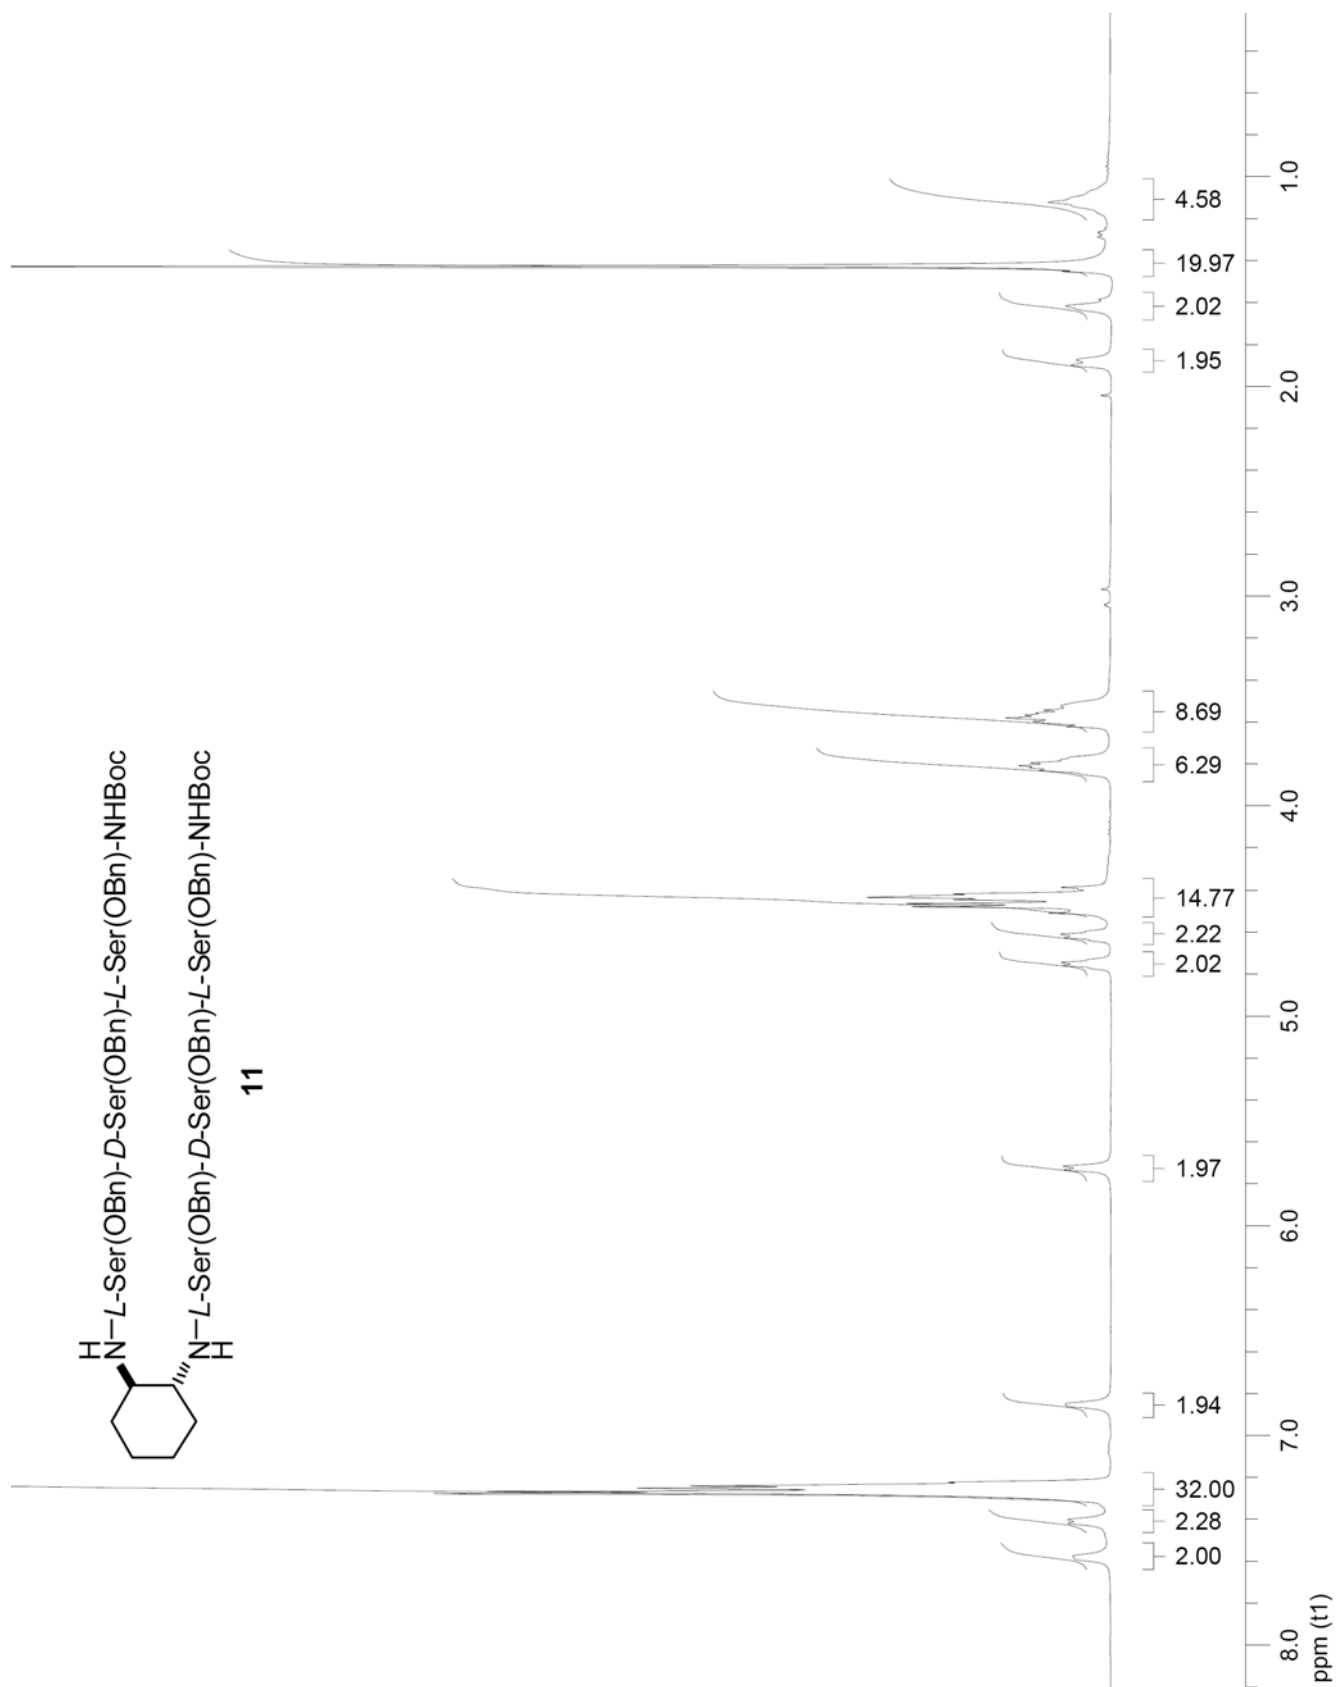

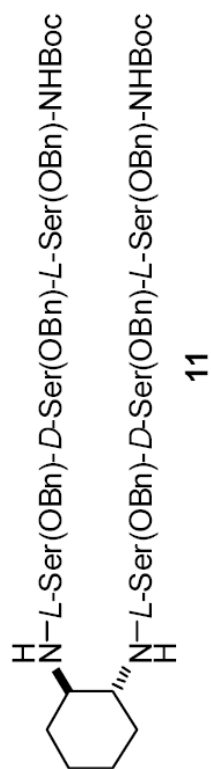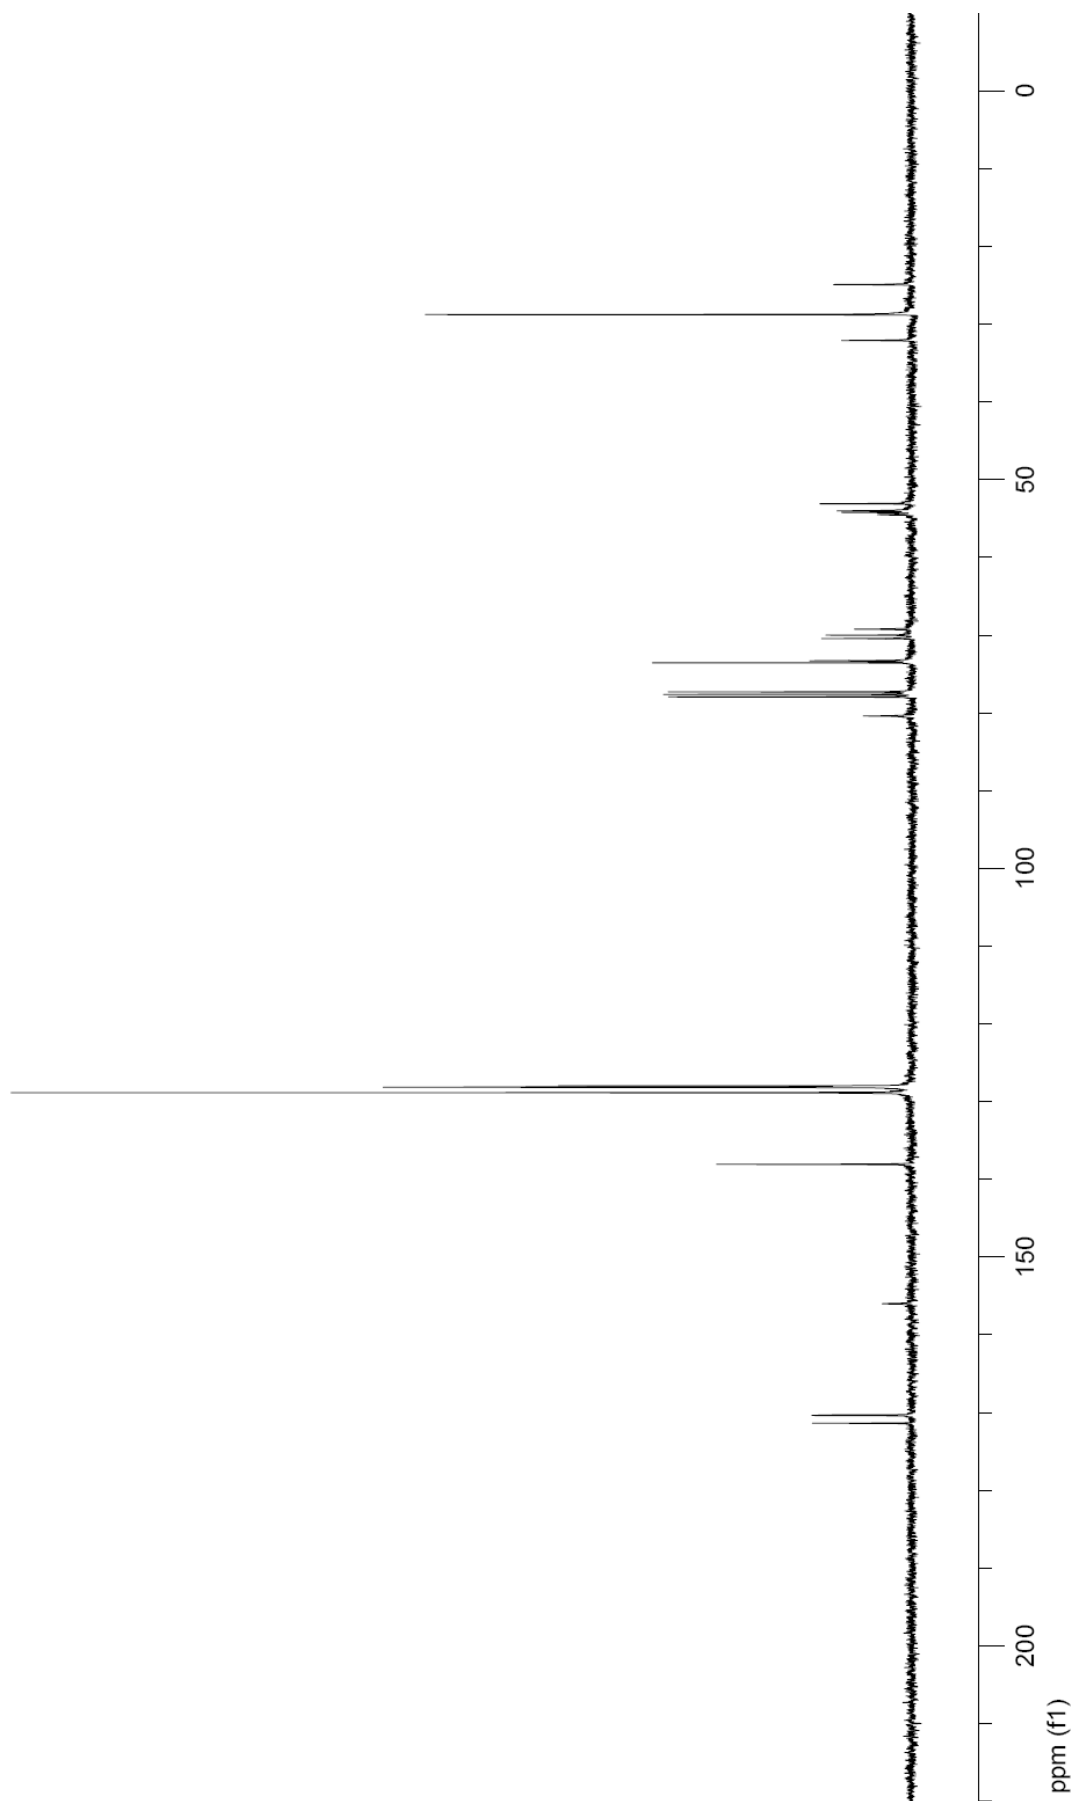

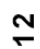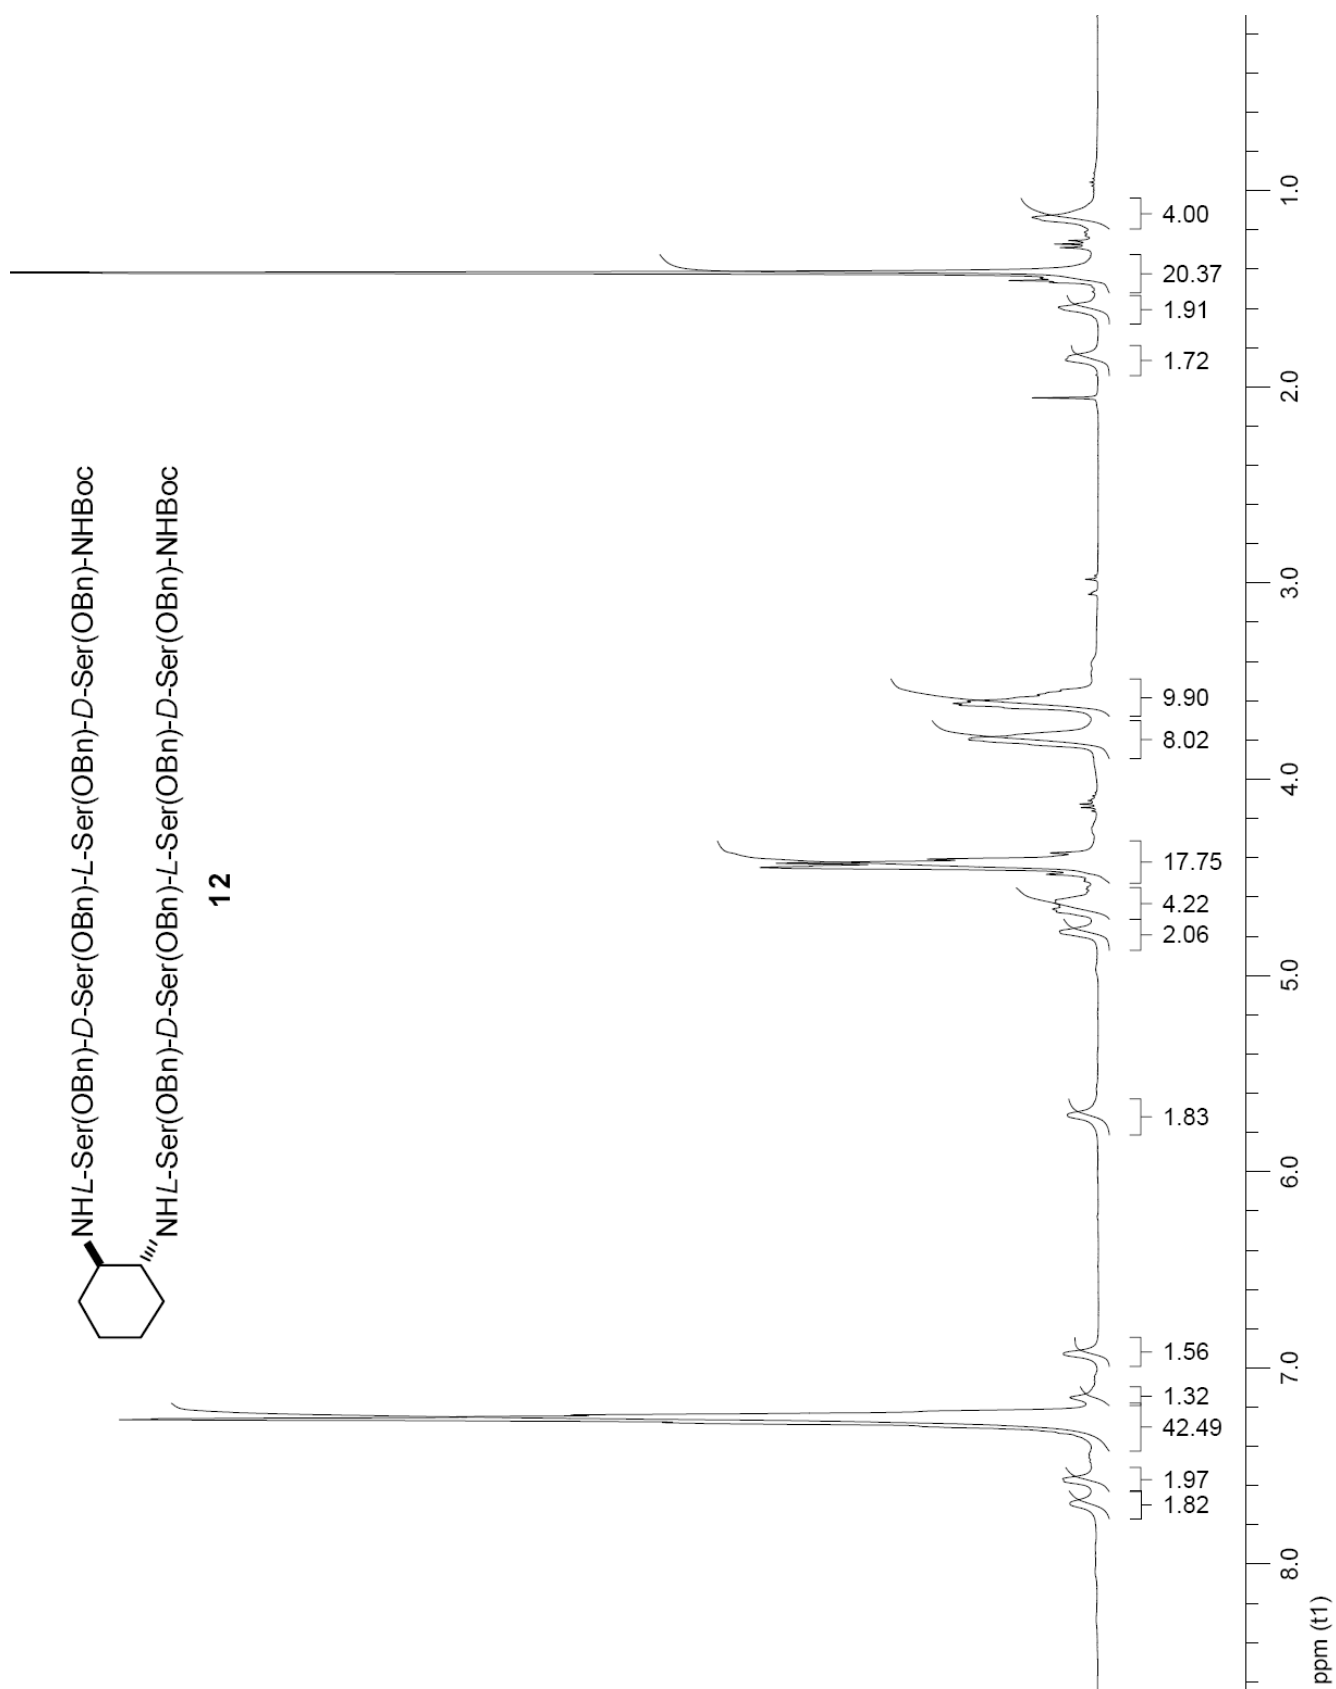

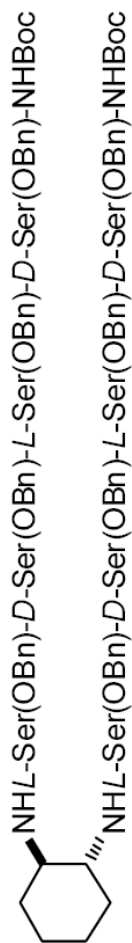

12

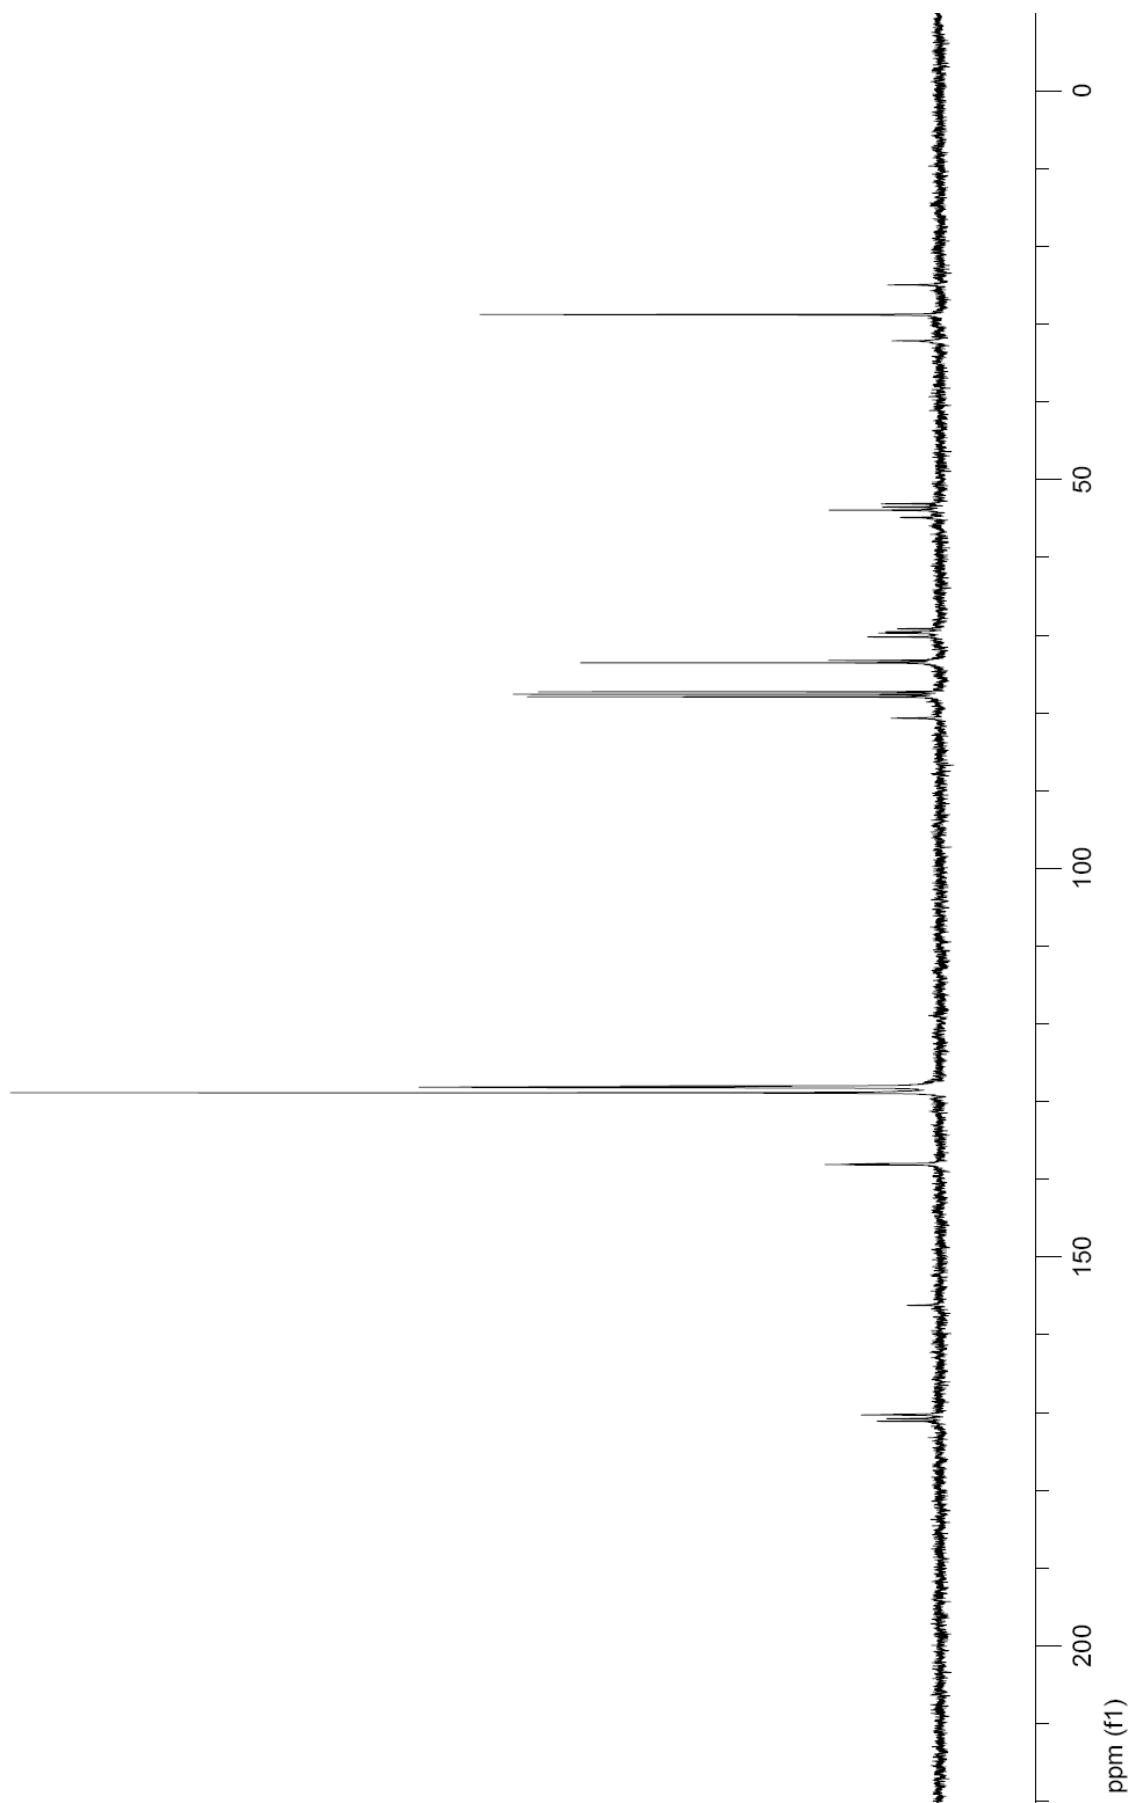

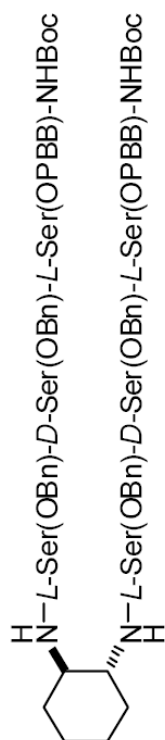

13

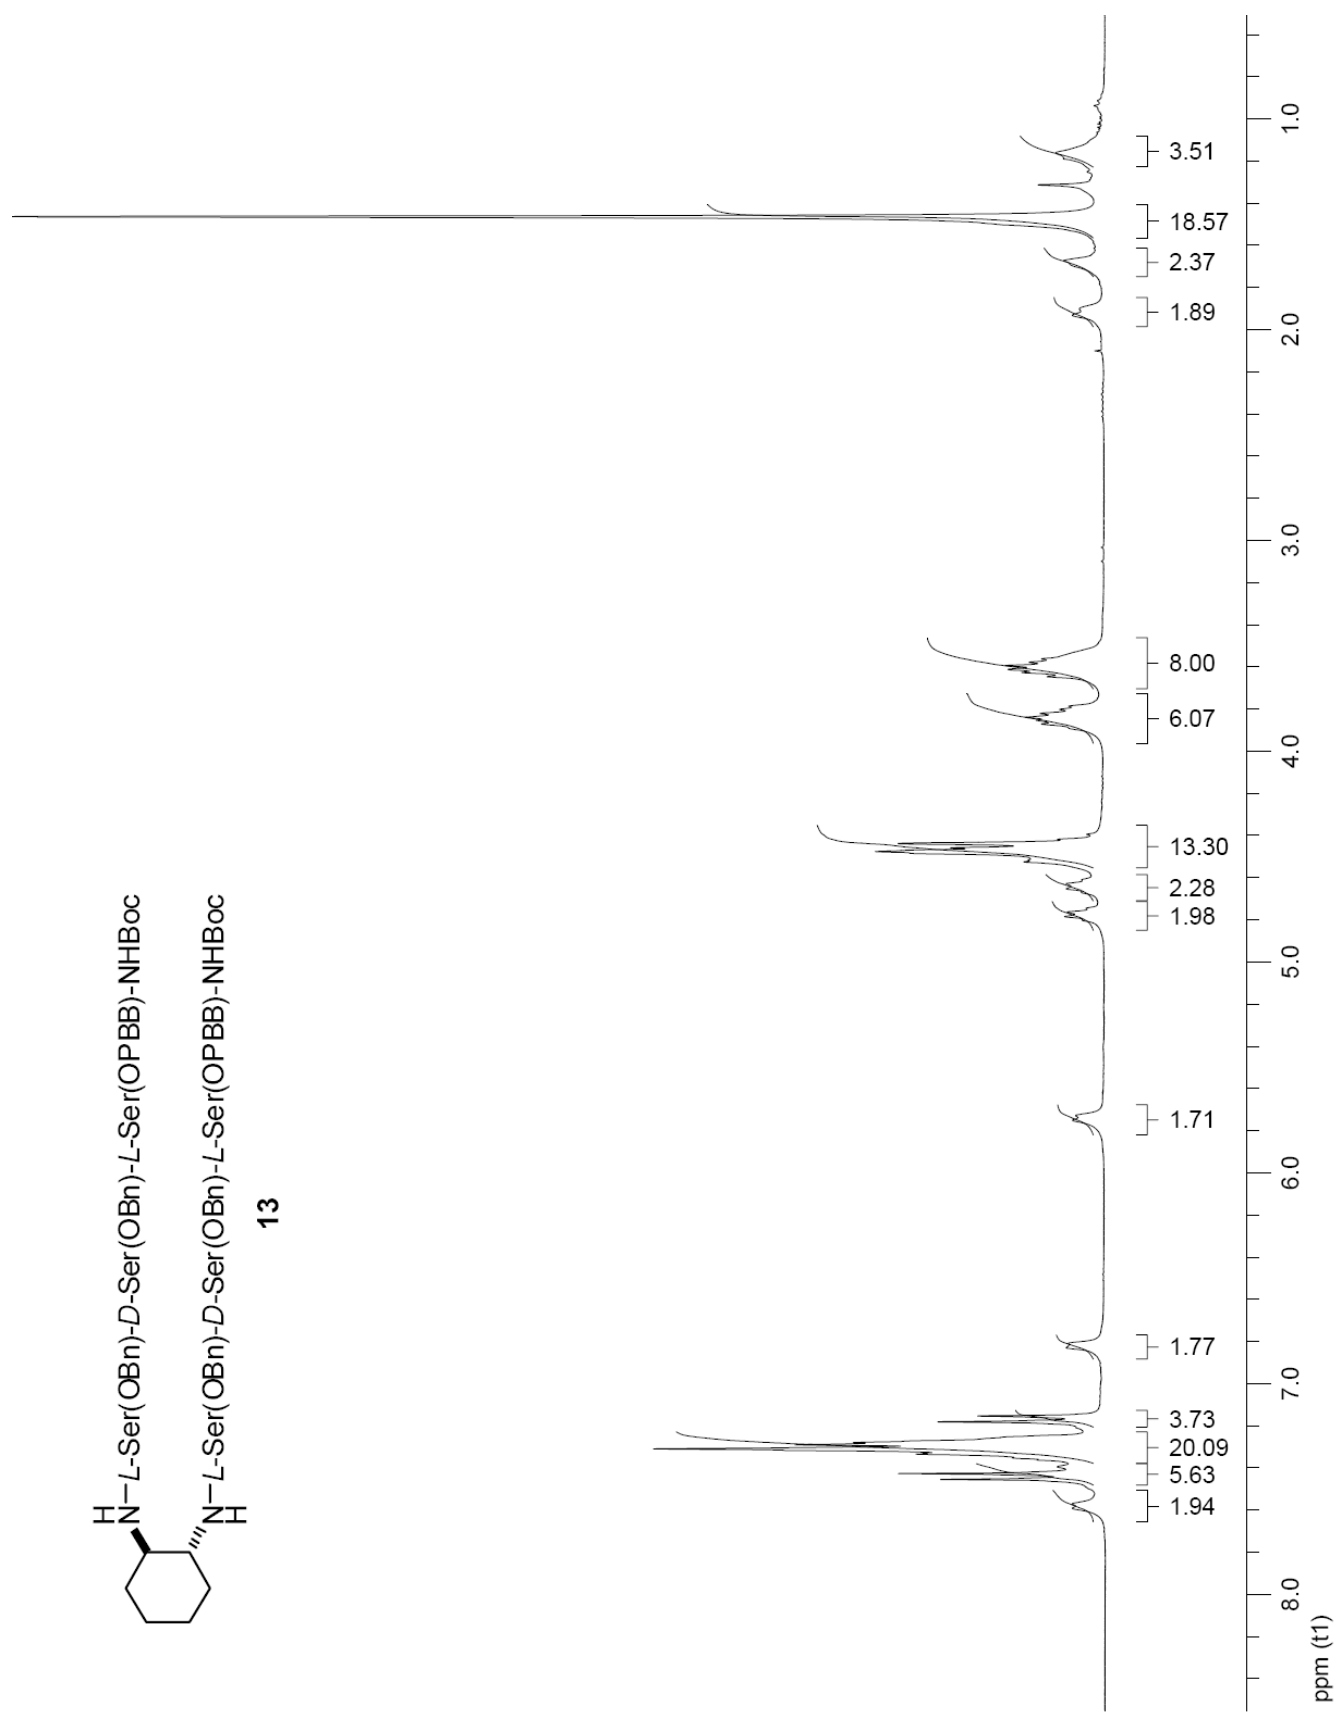

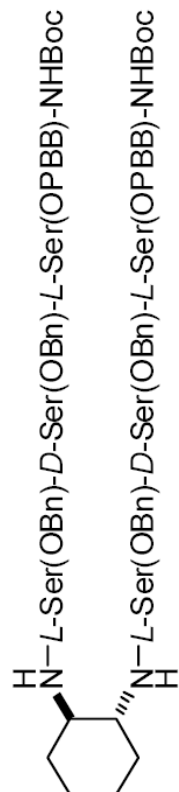**13**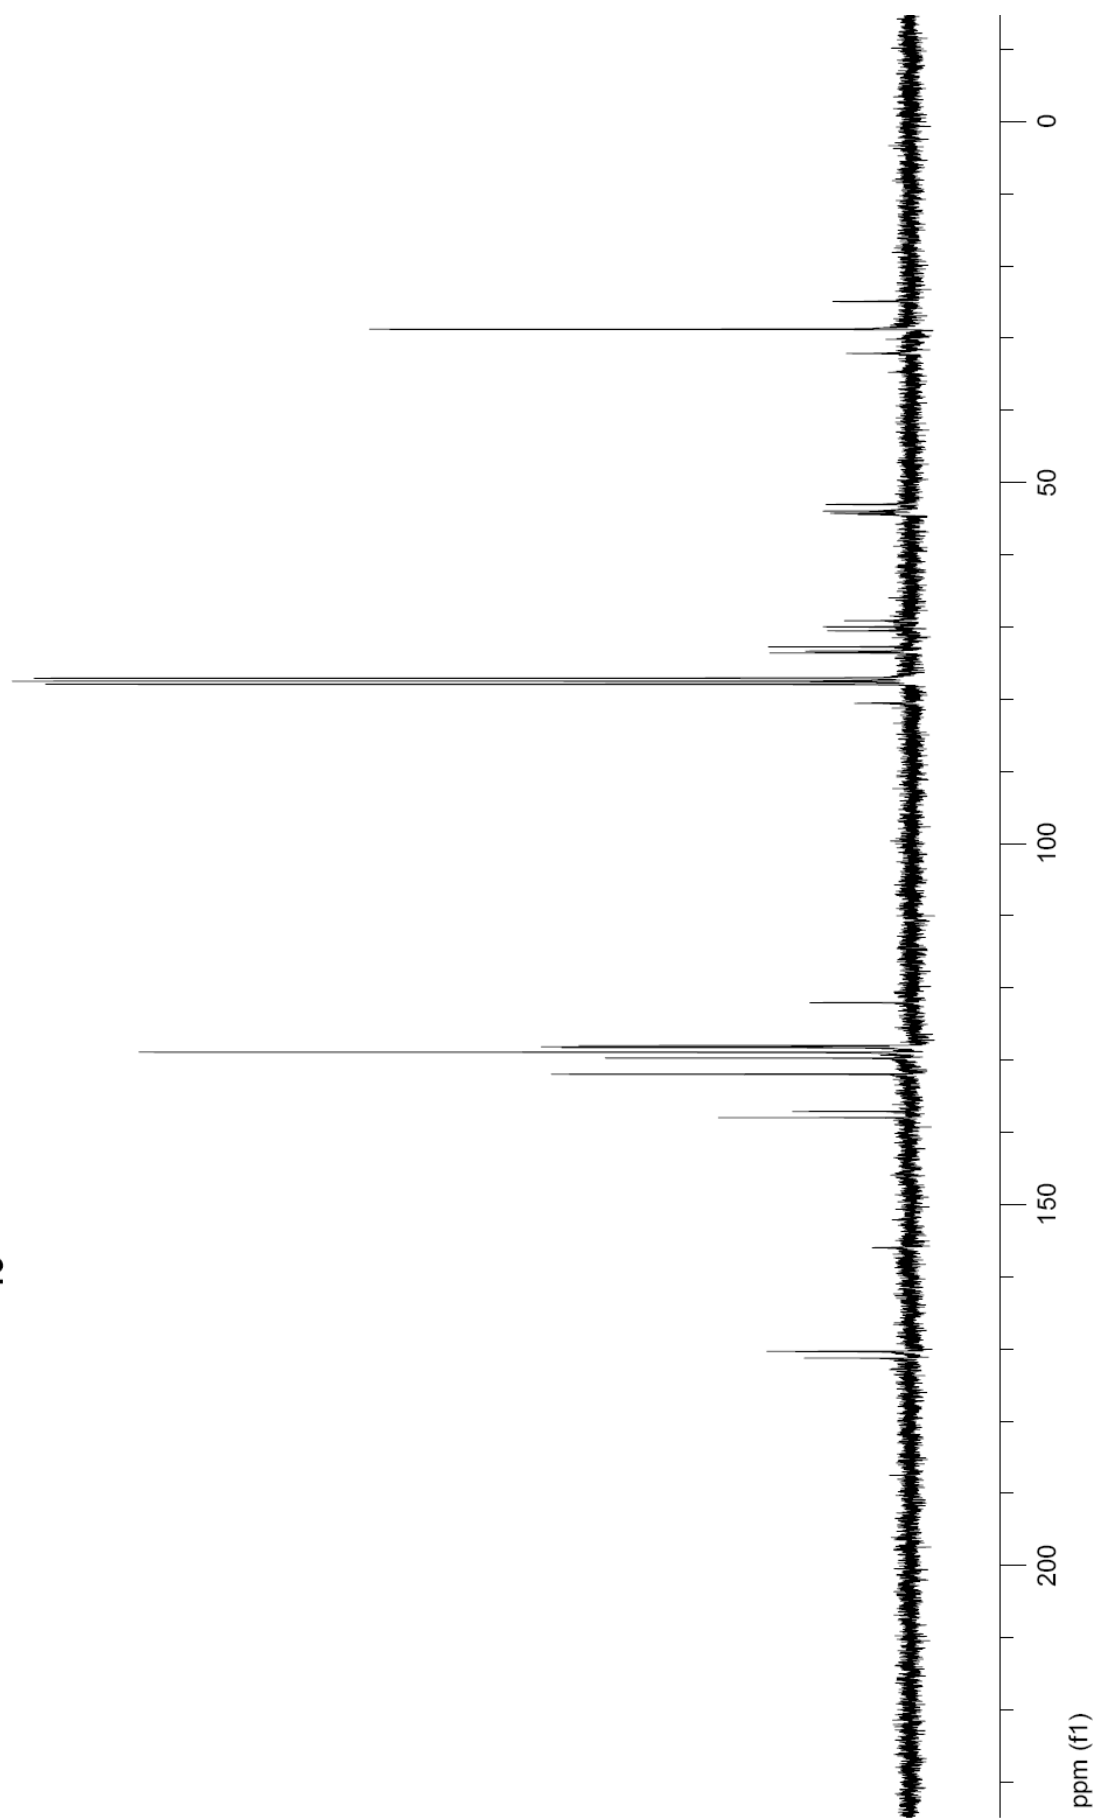

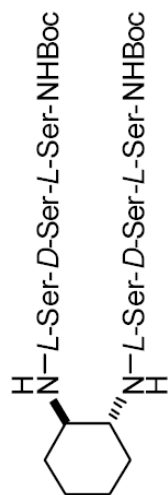**14**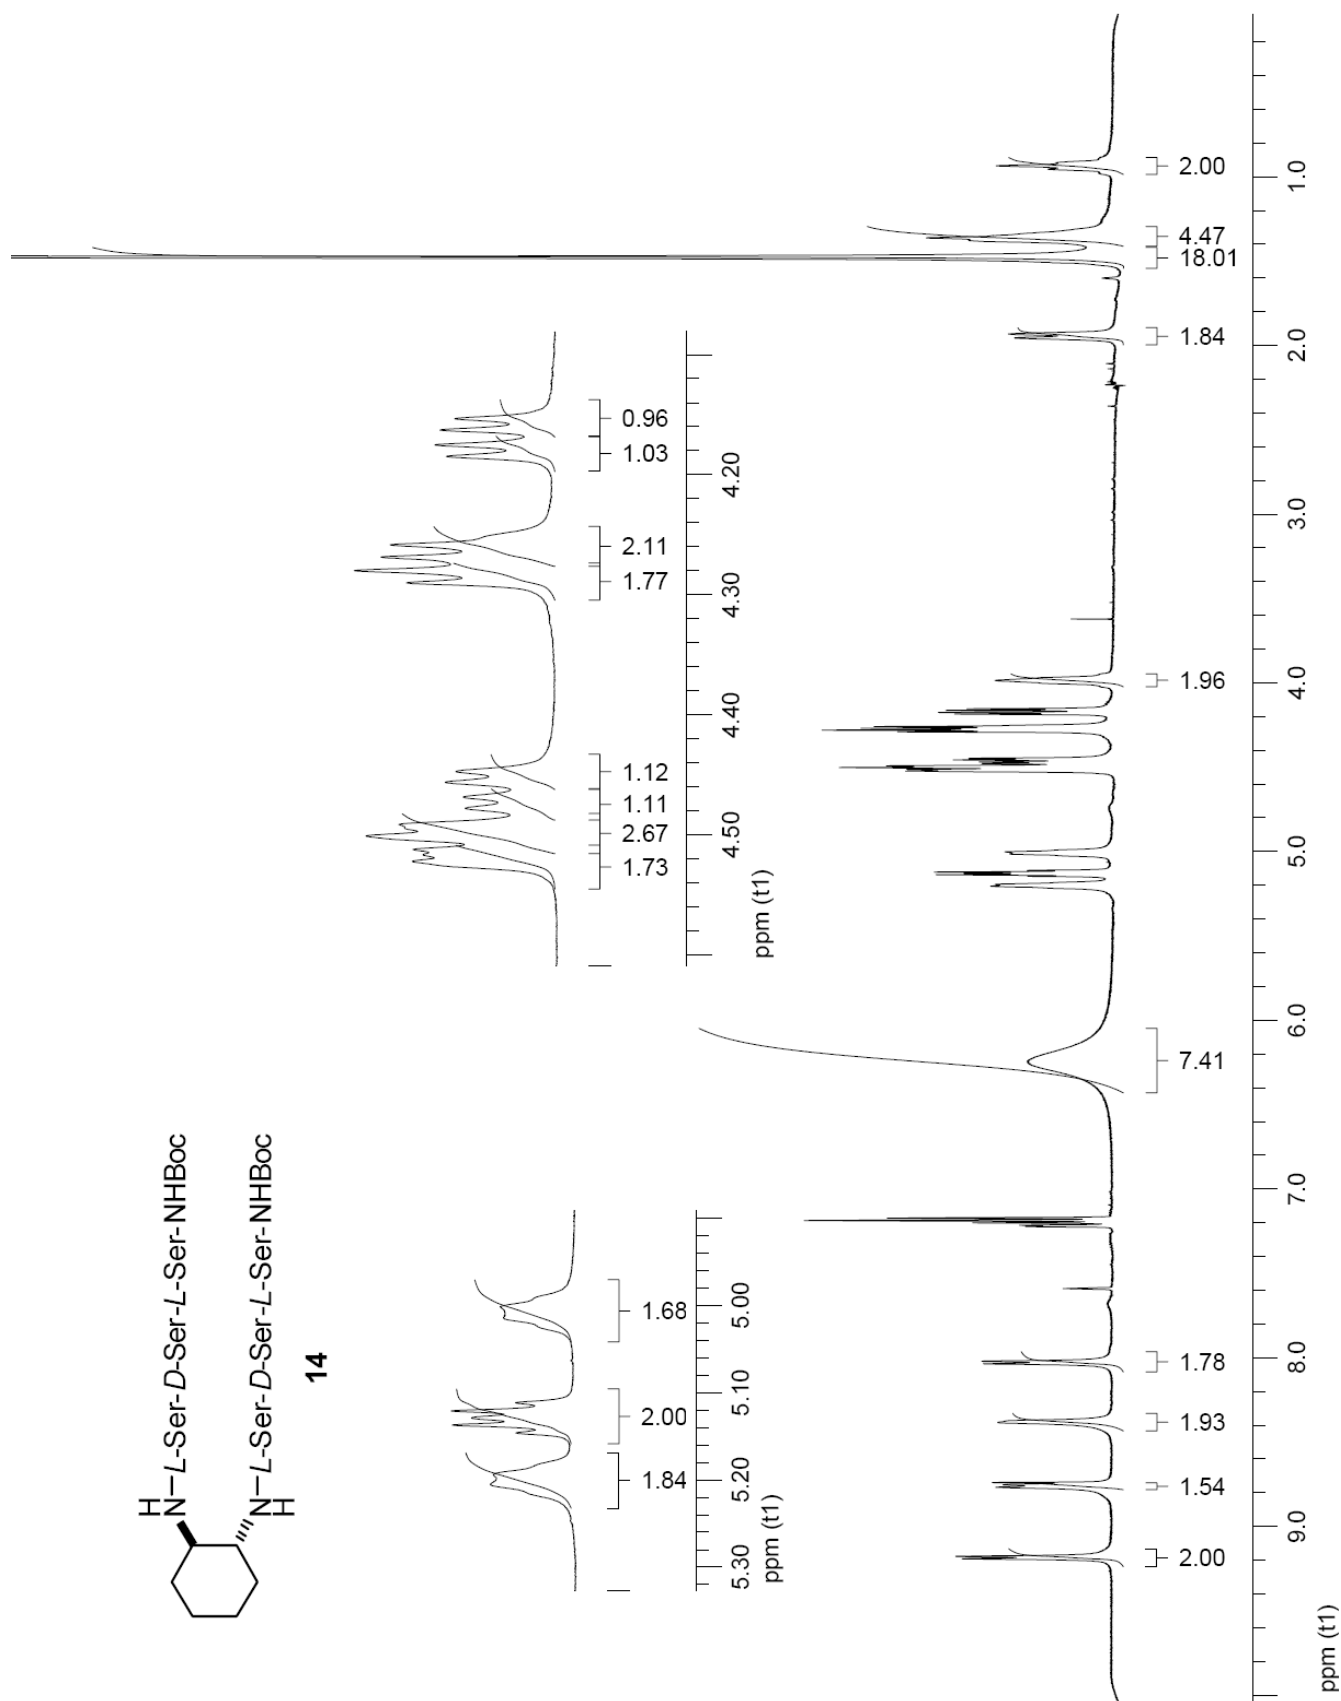



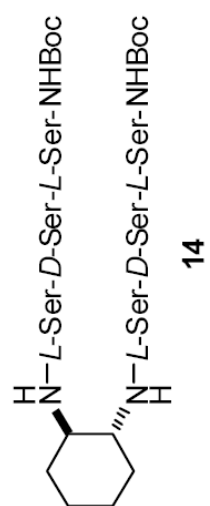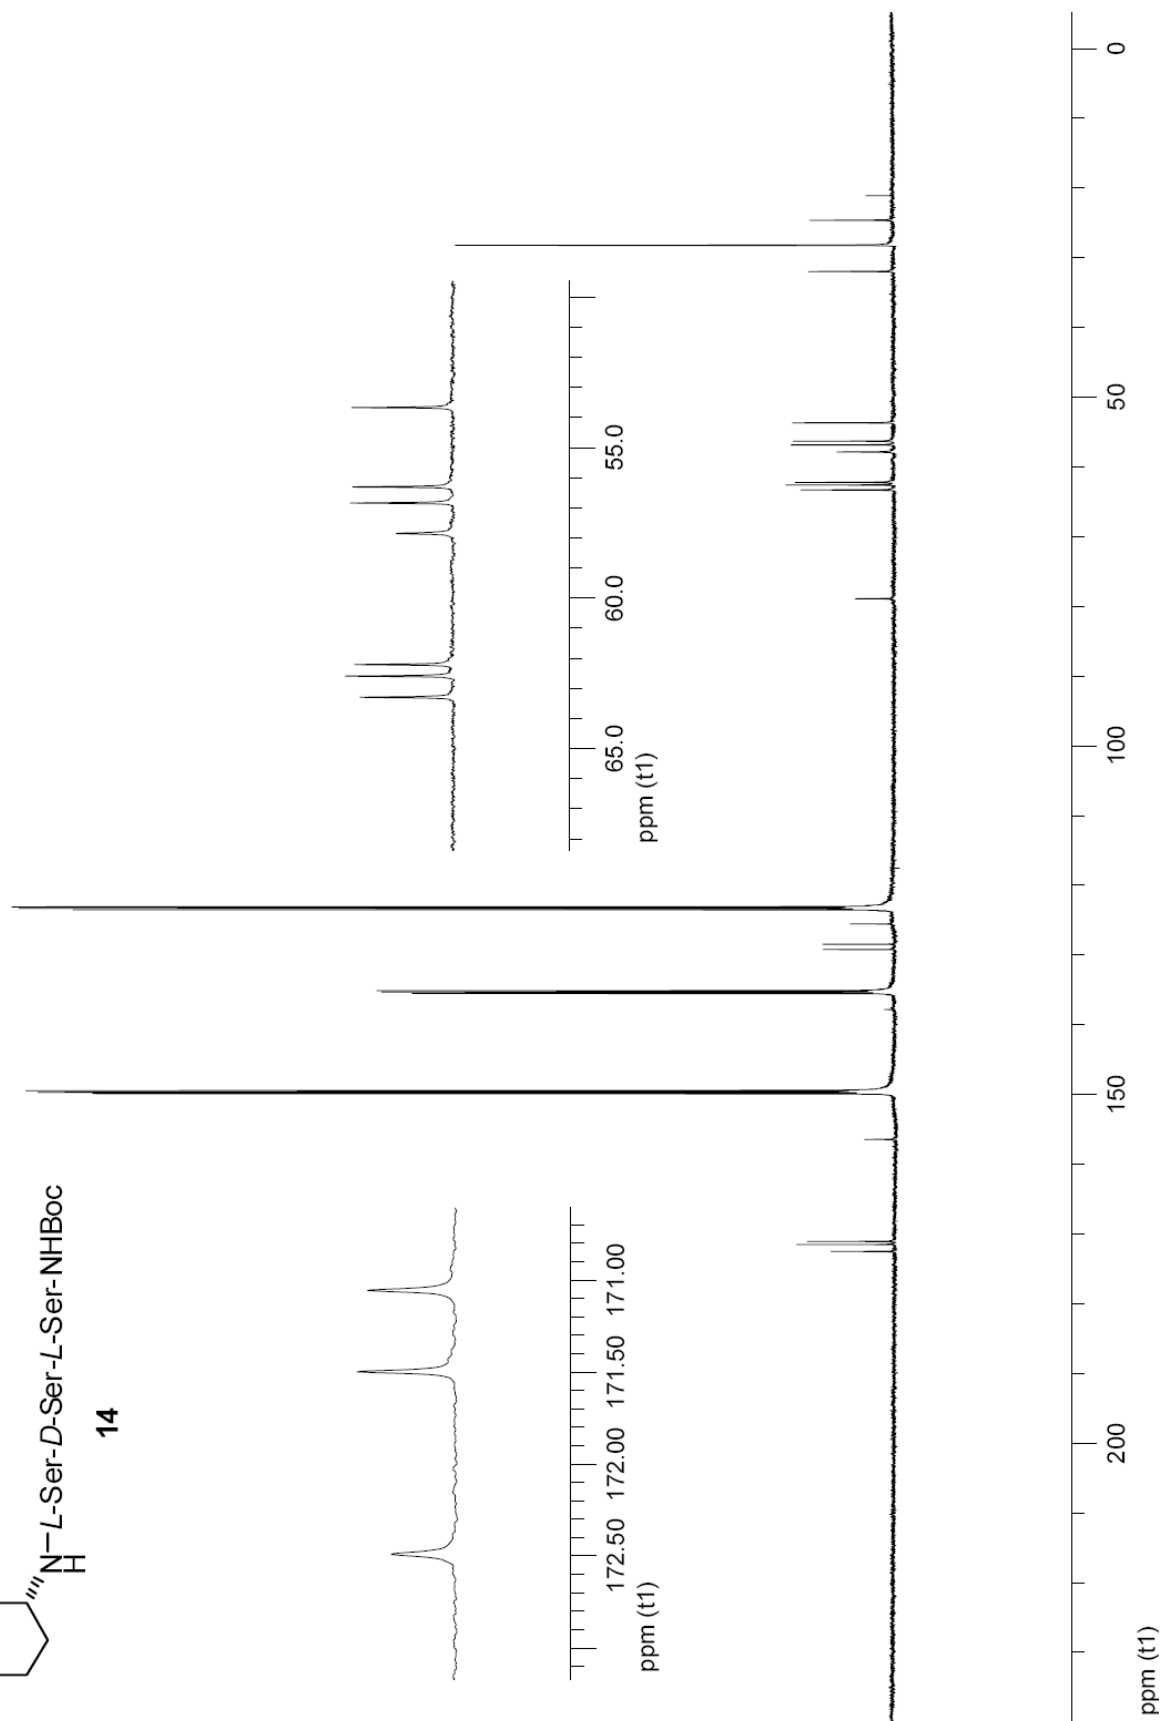

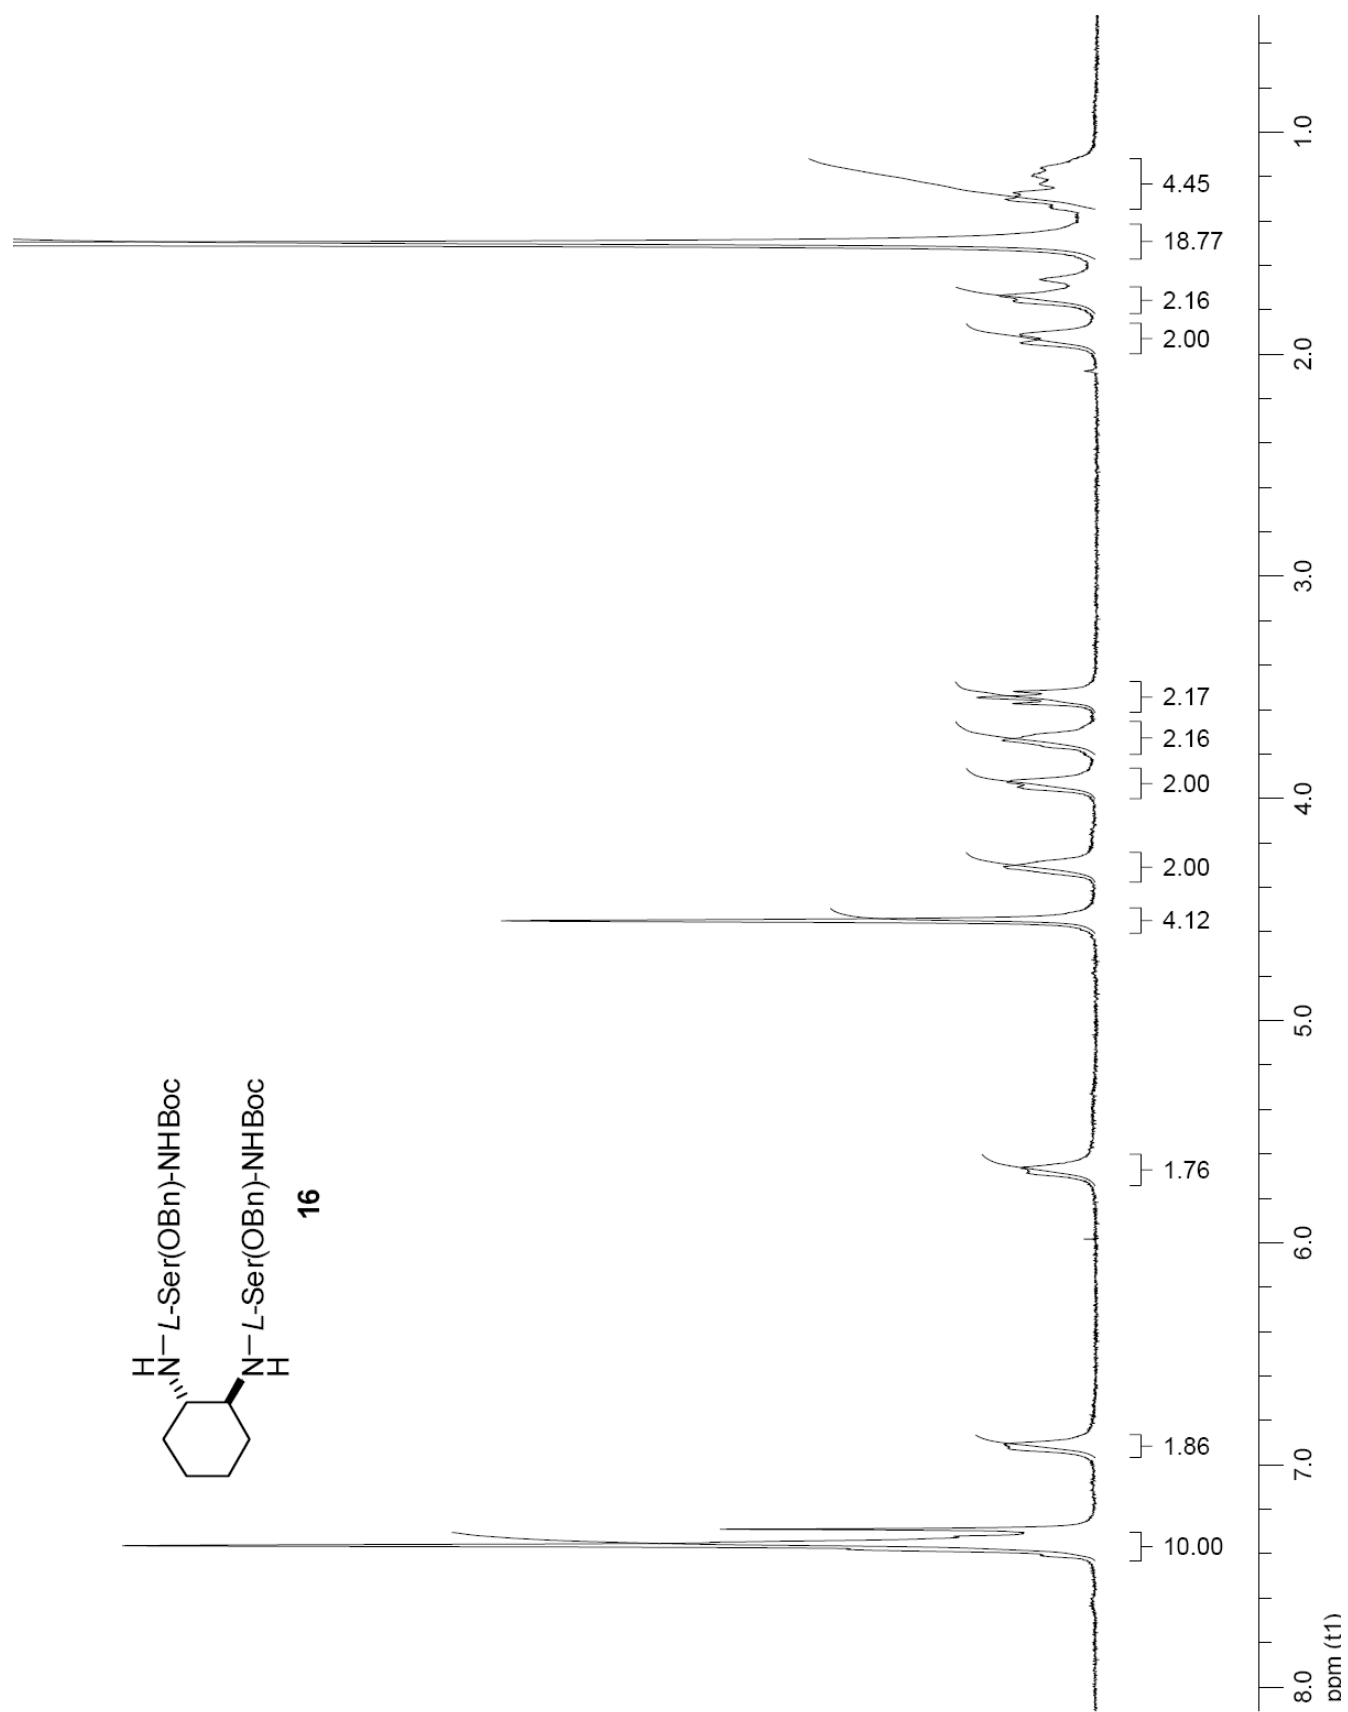

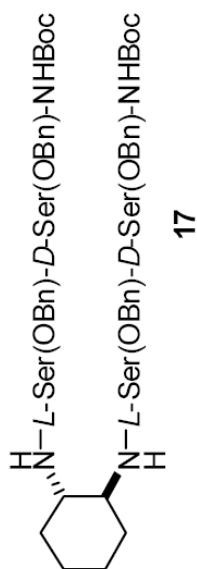

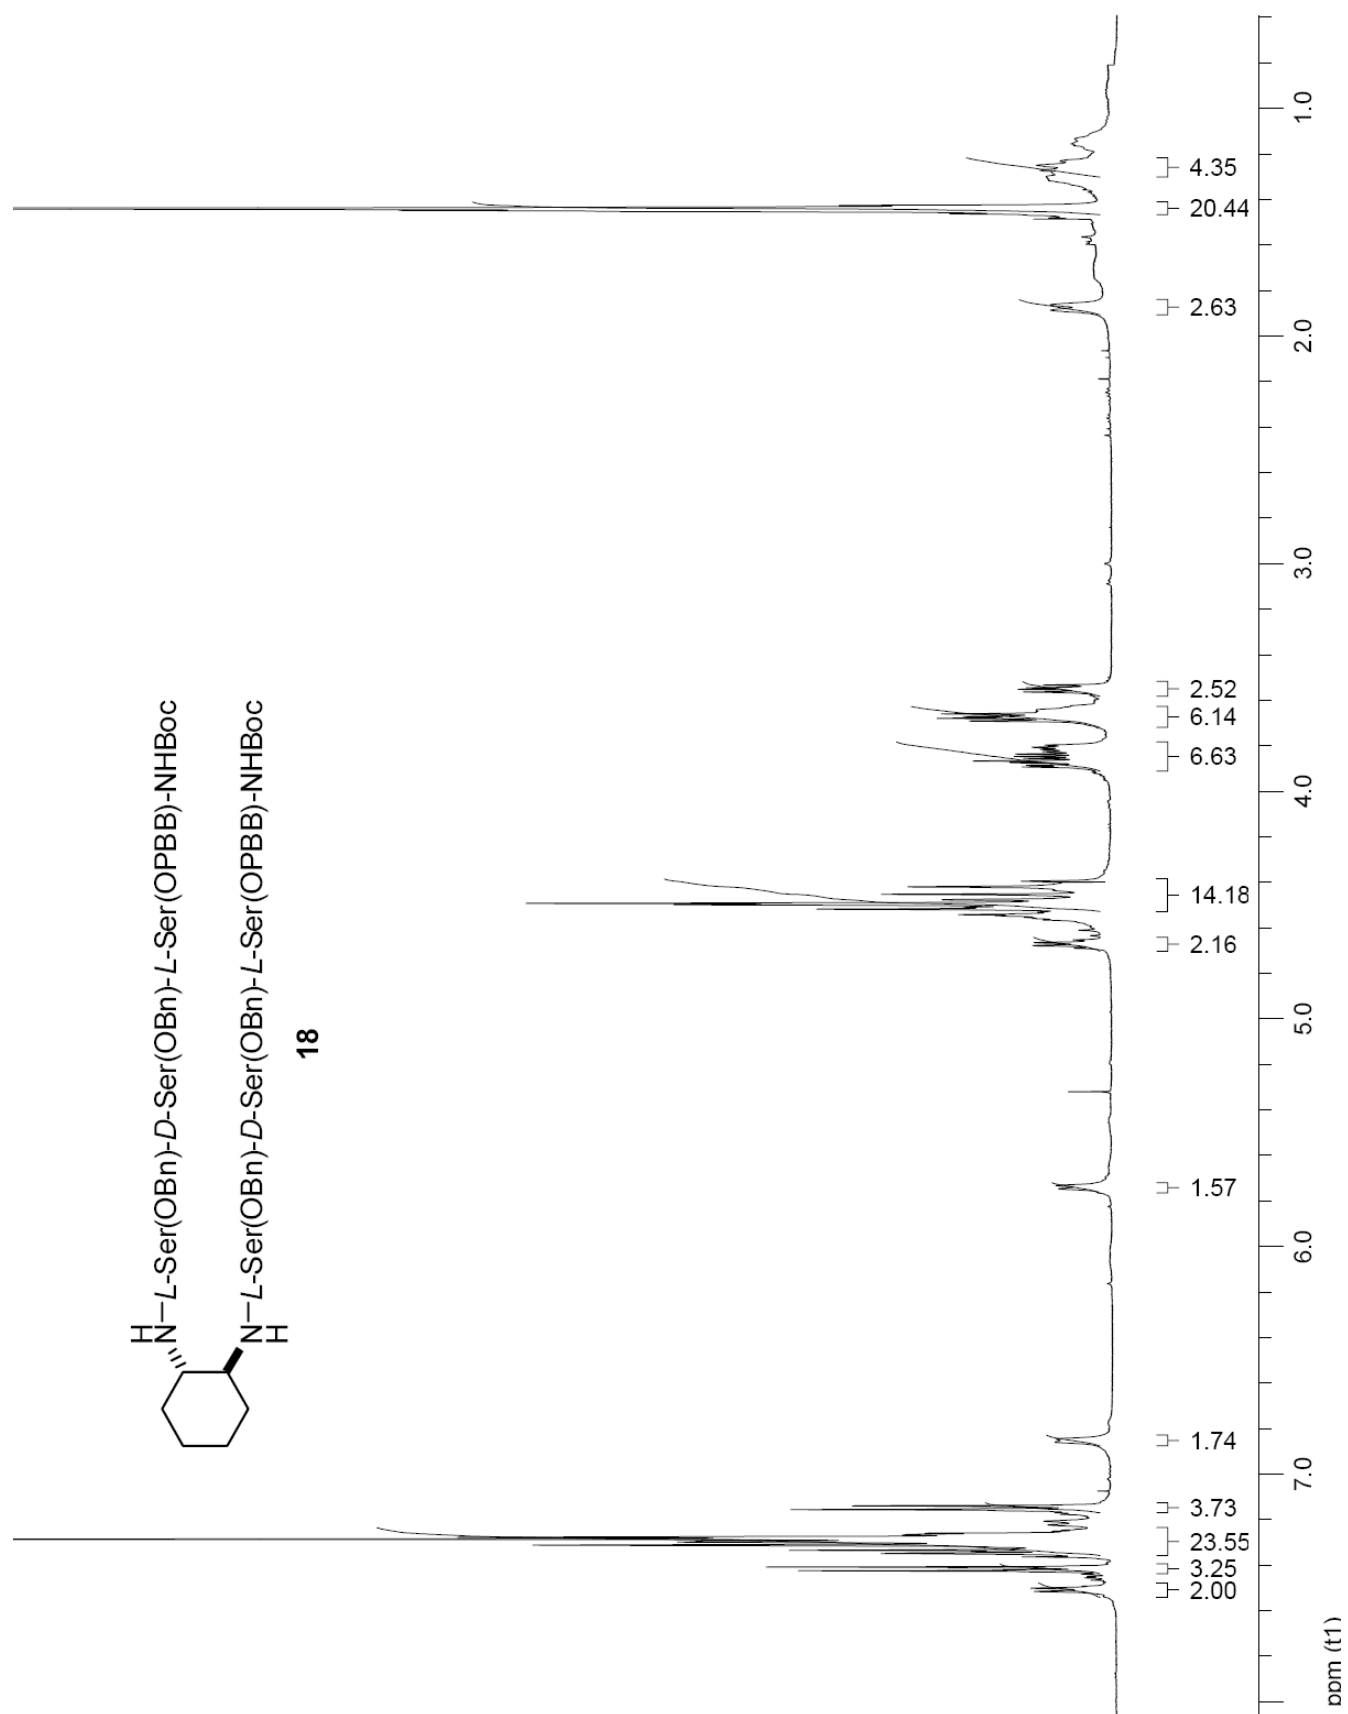

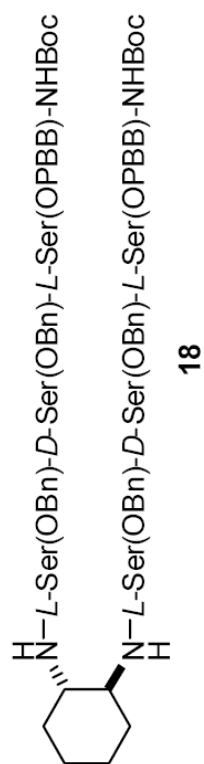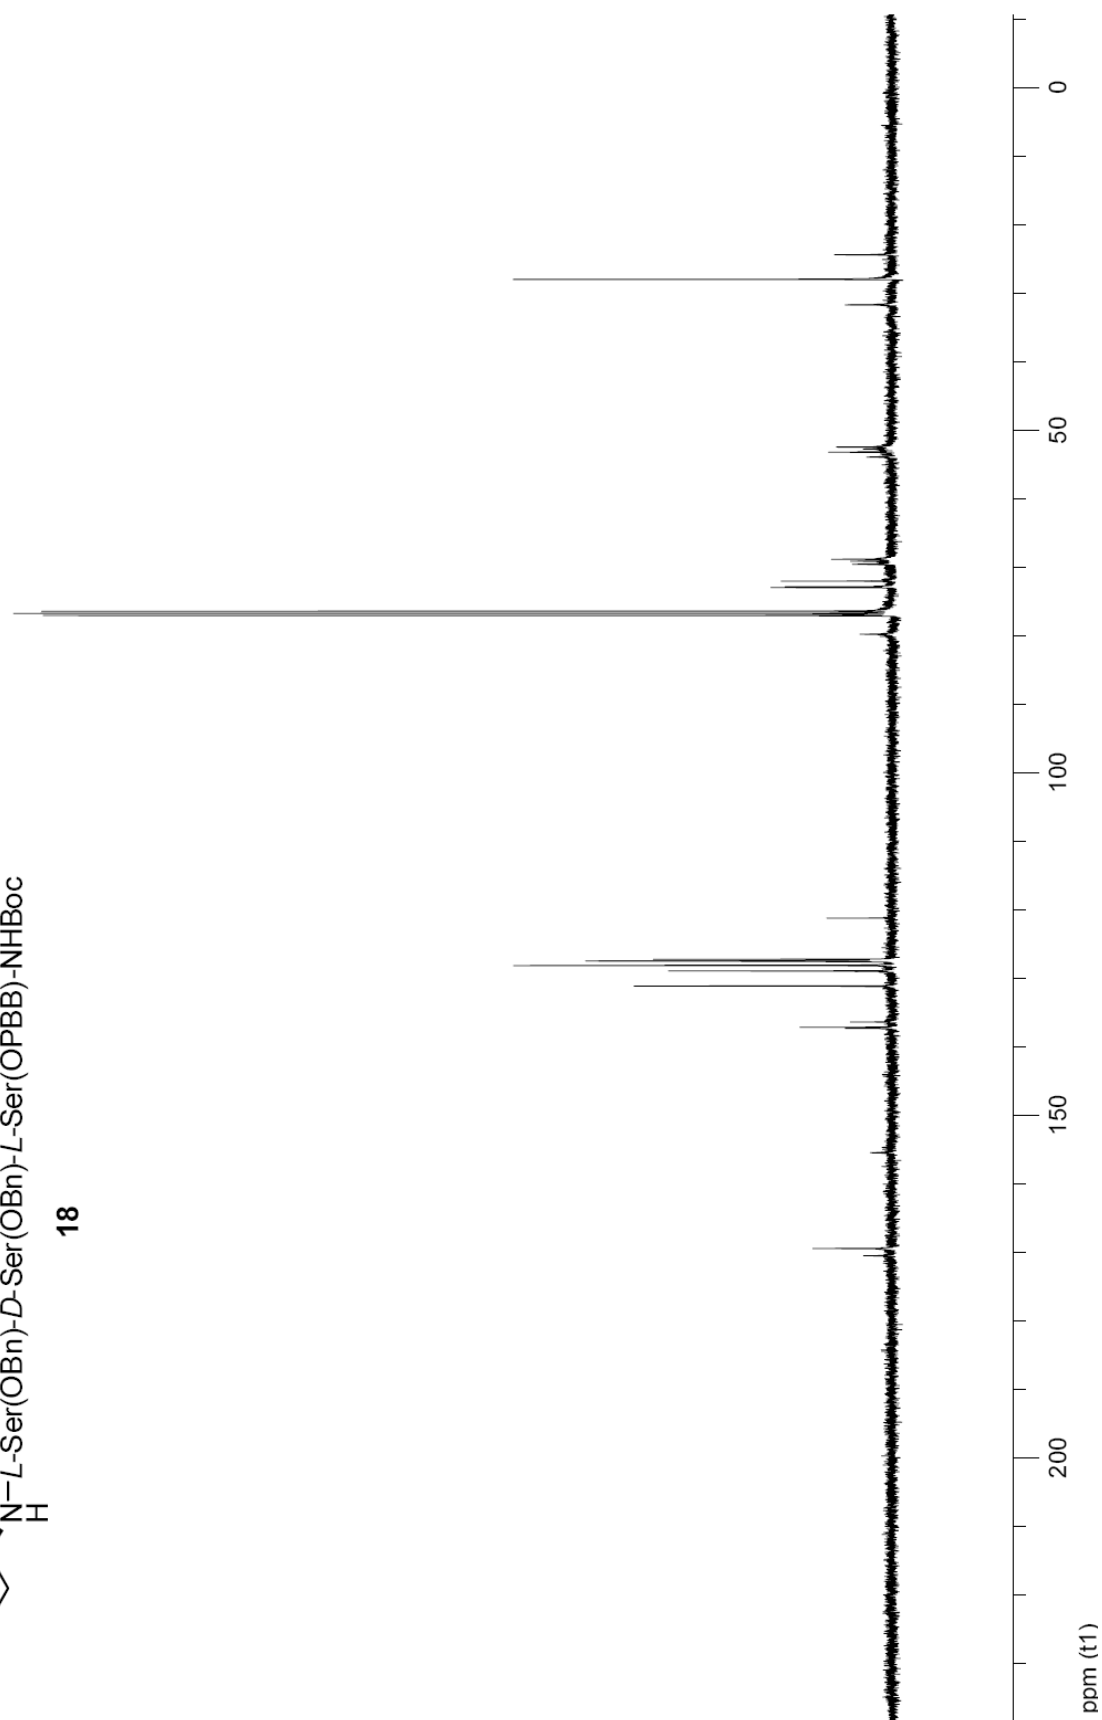

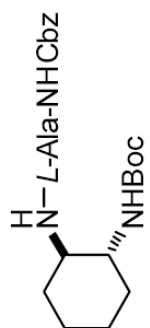**20**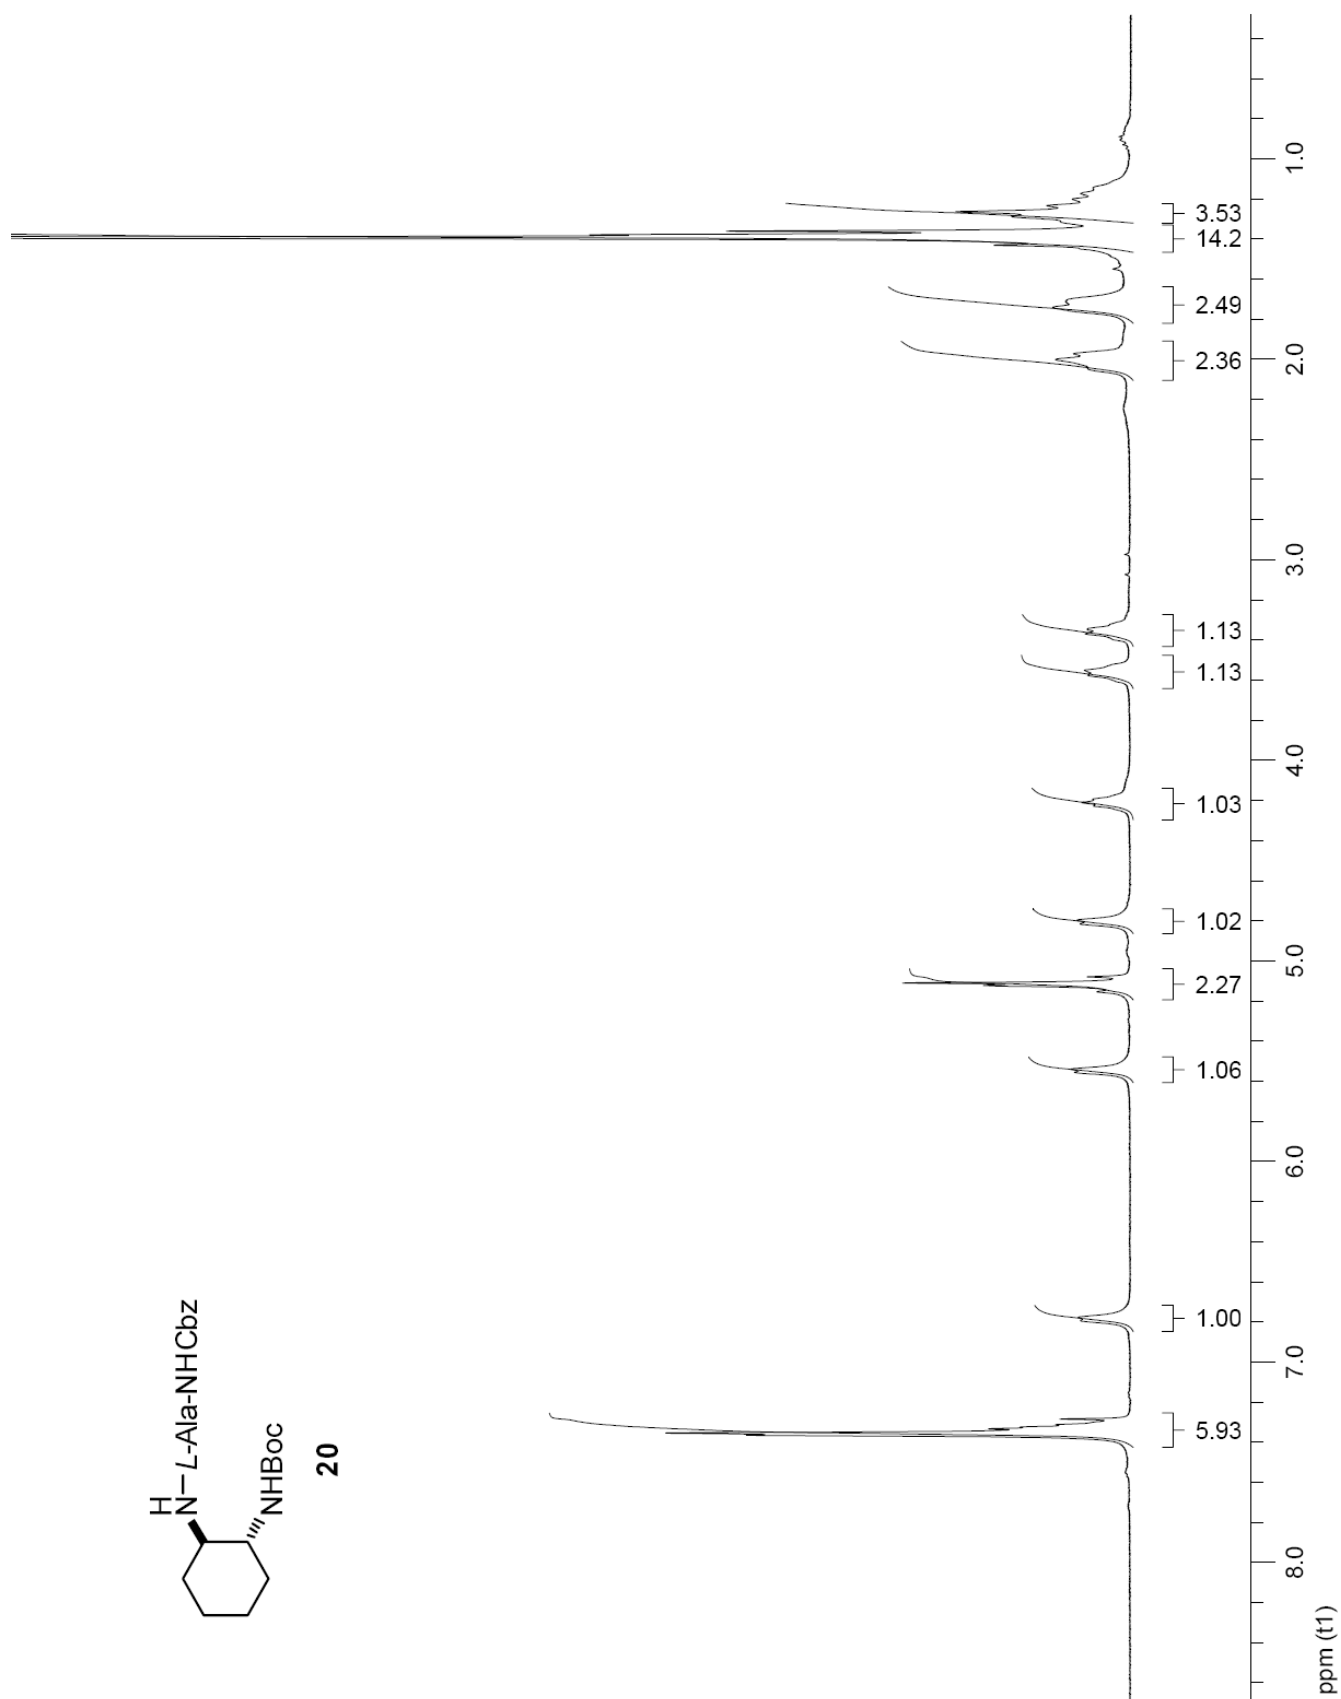

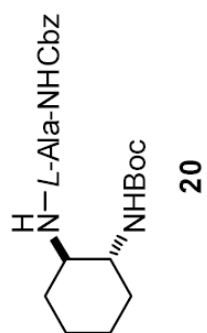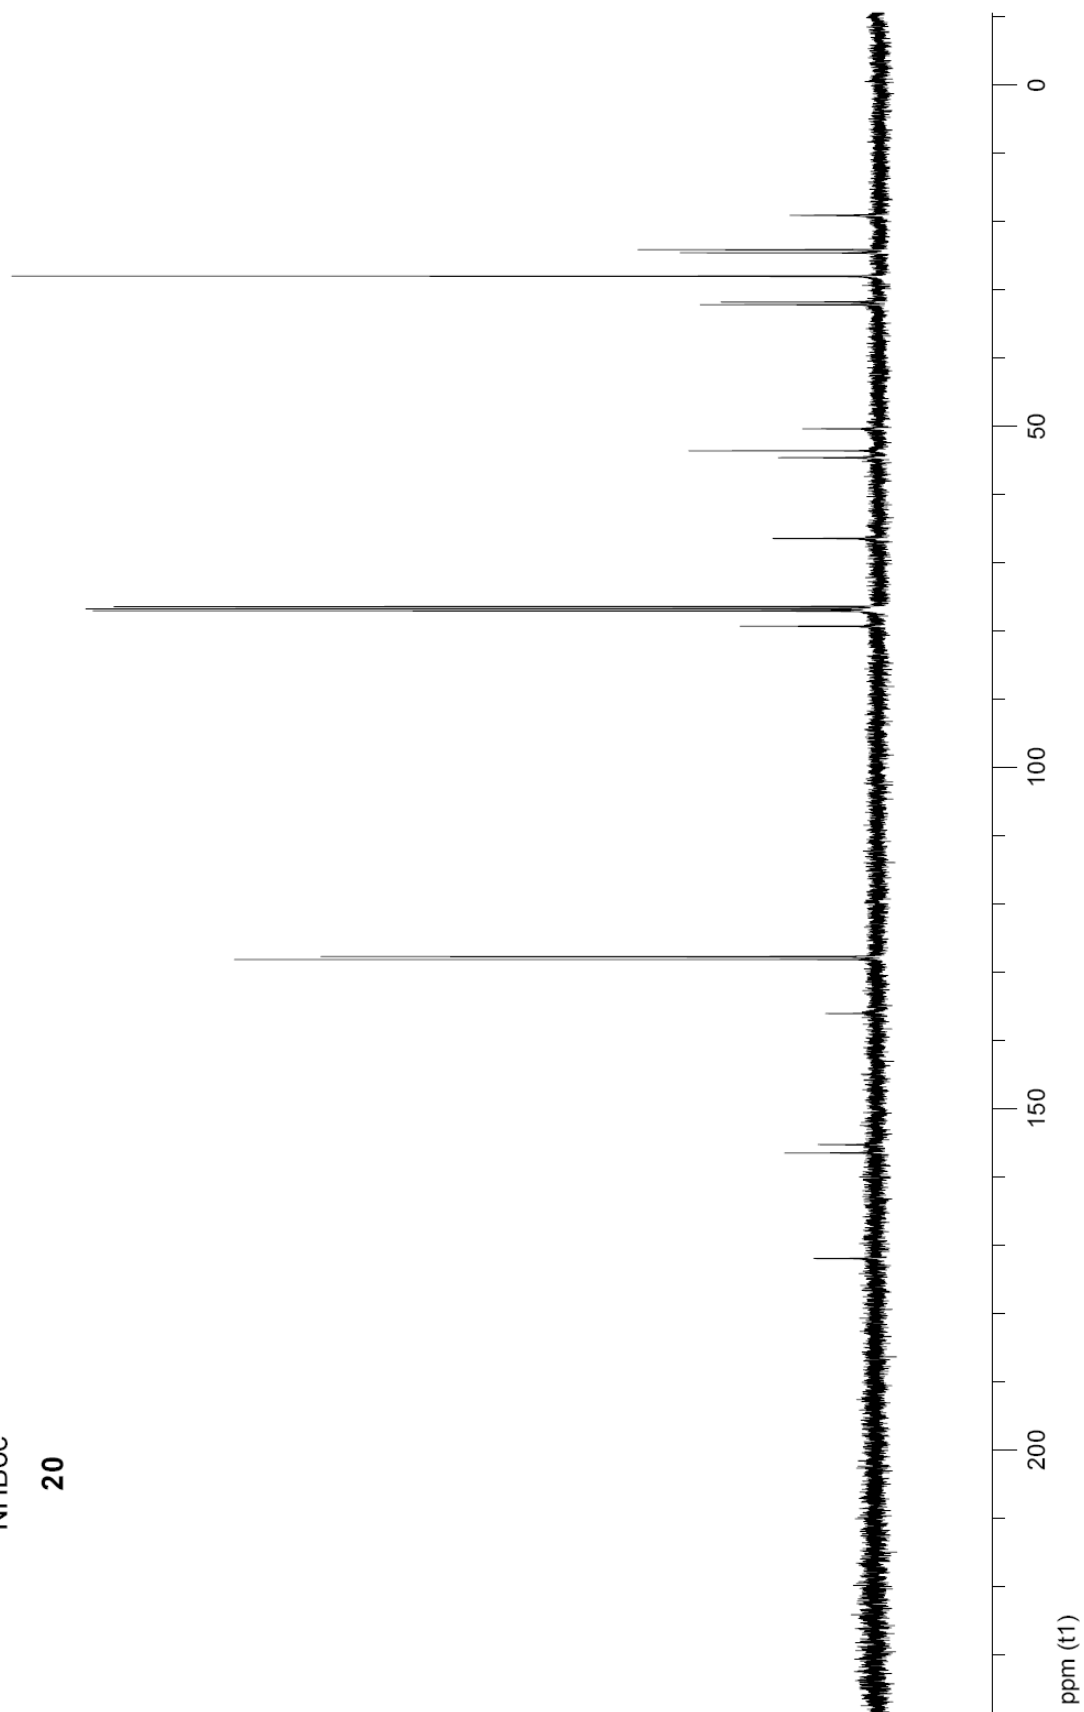

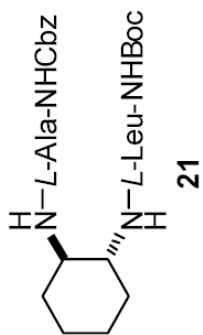



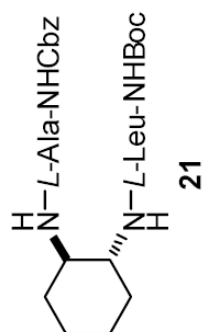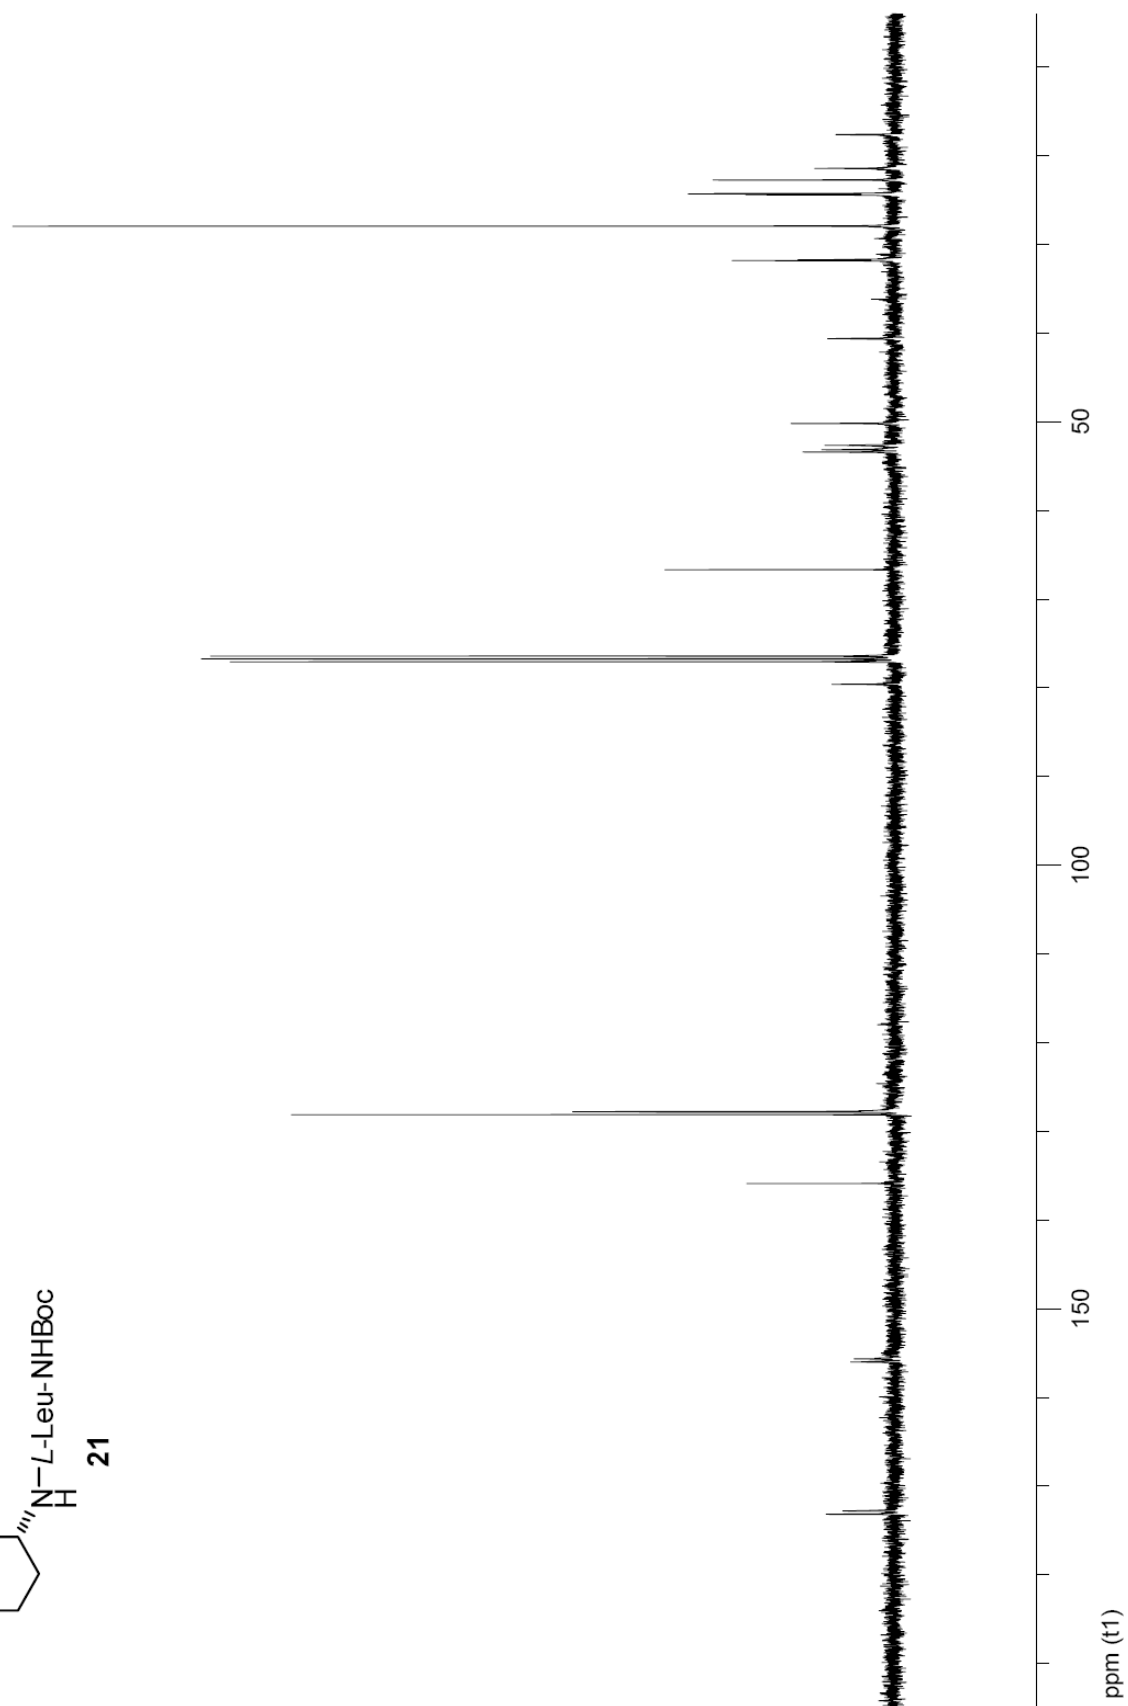

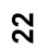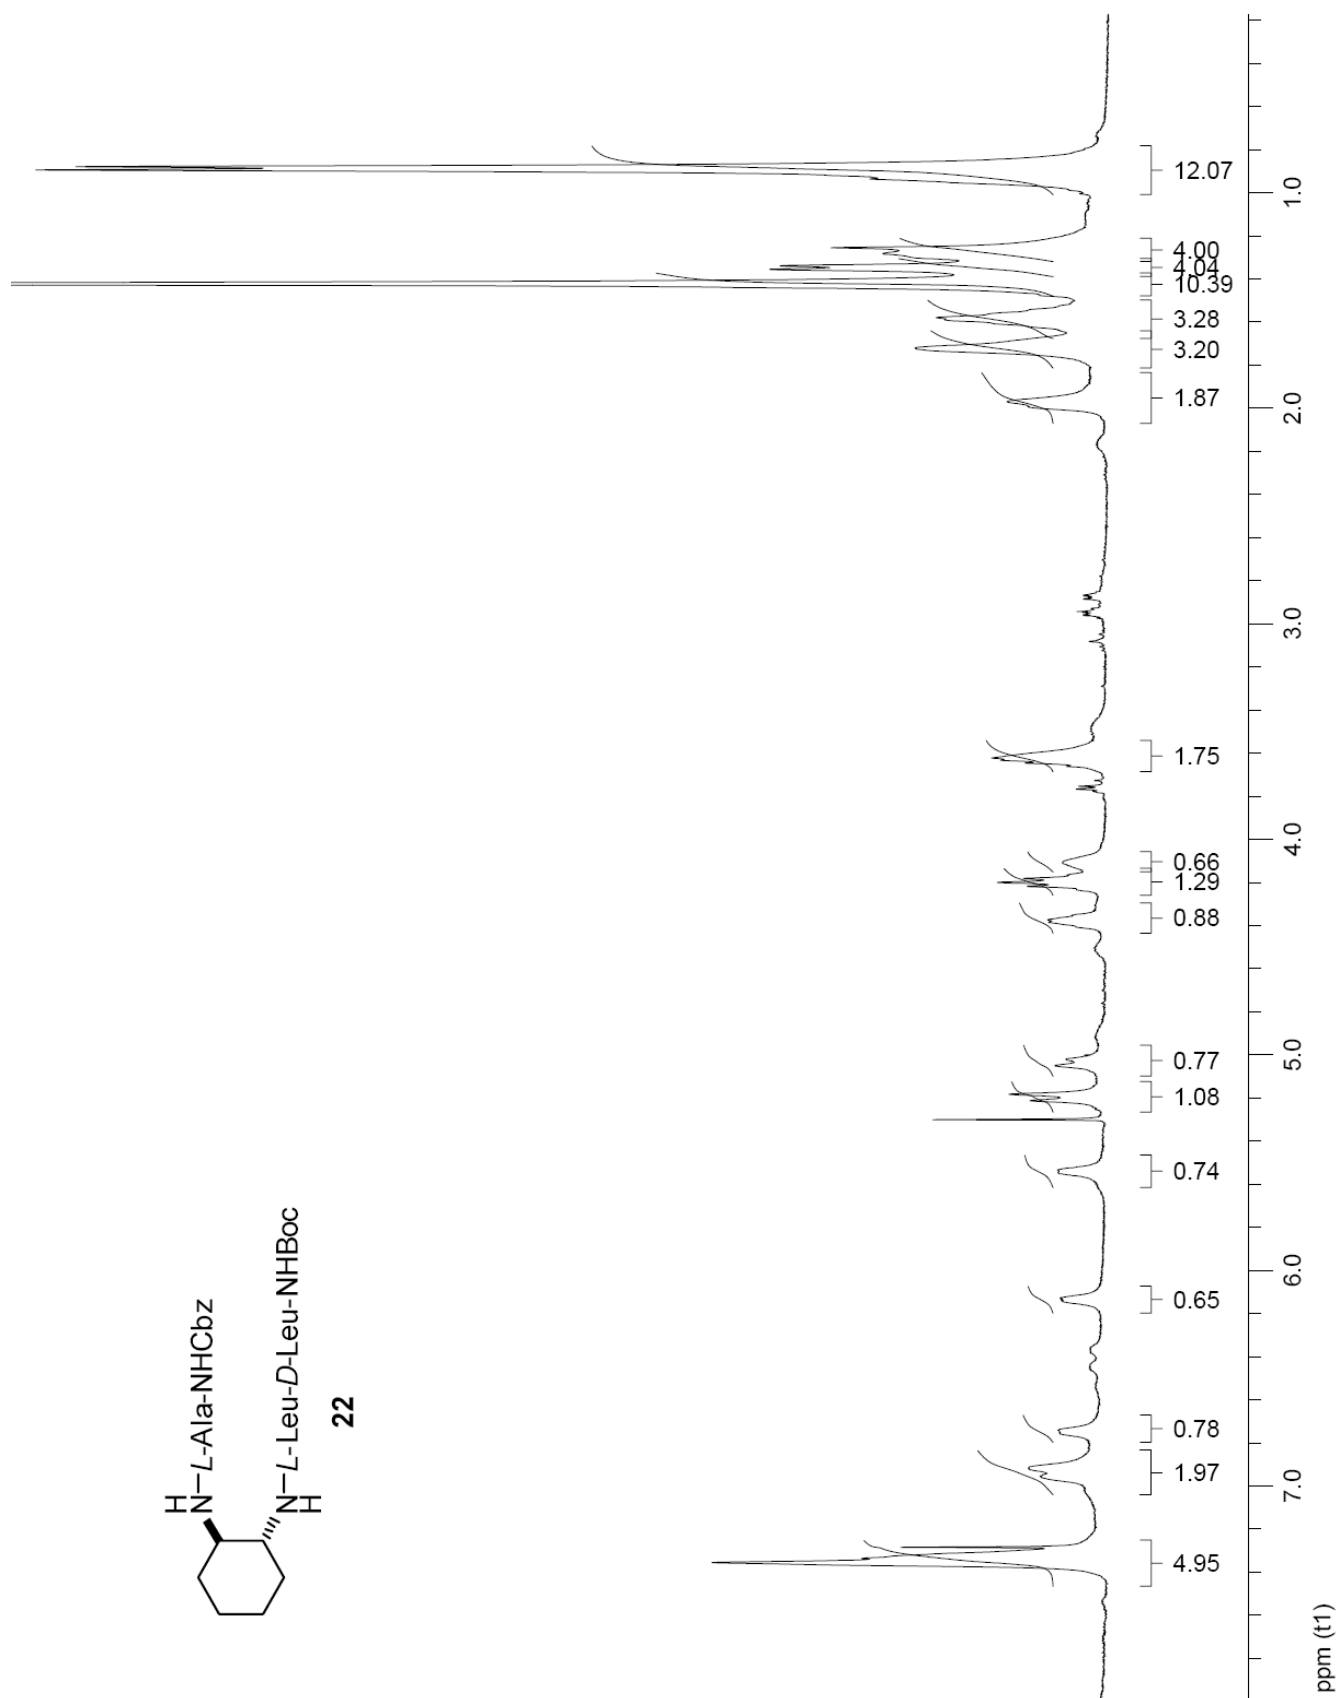

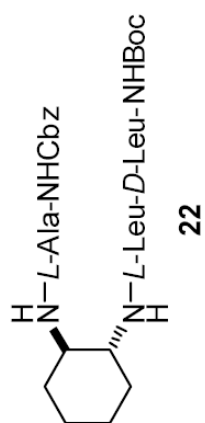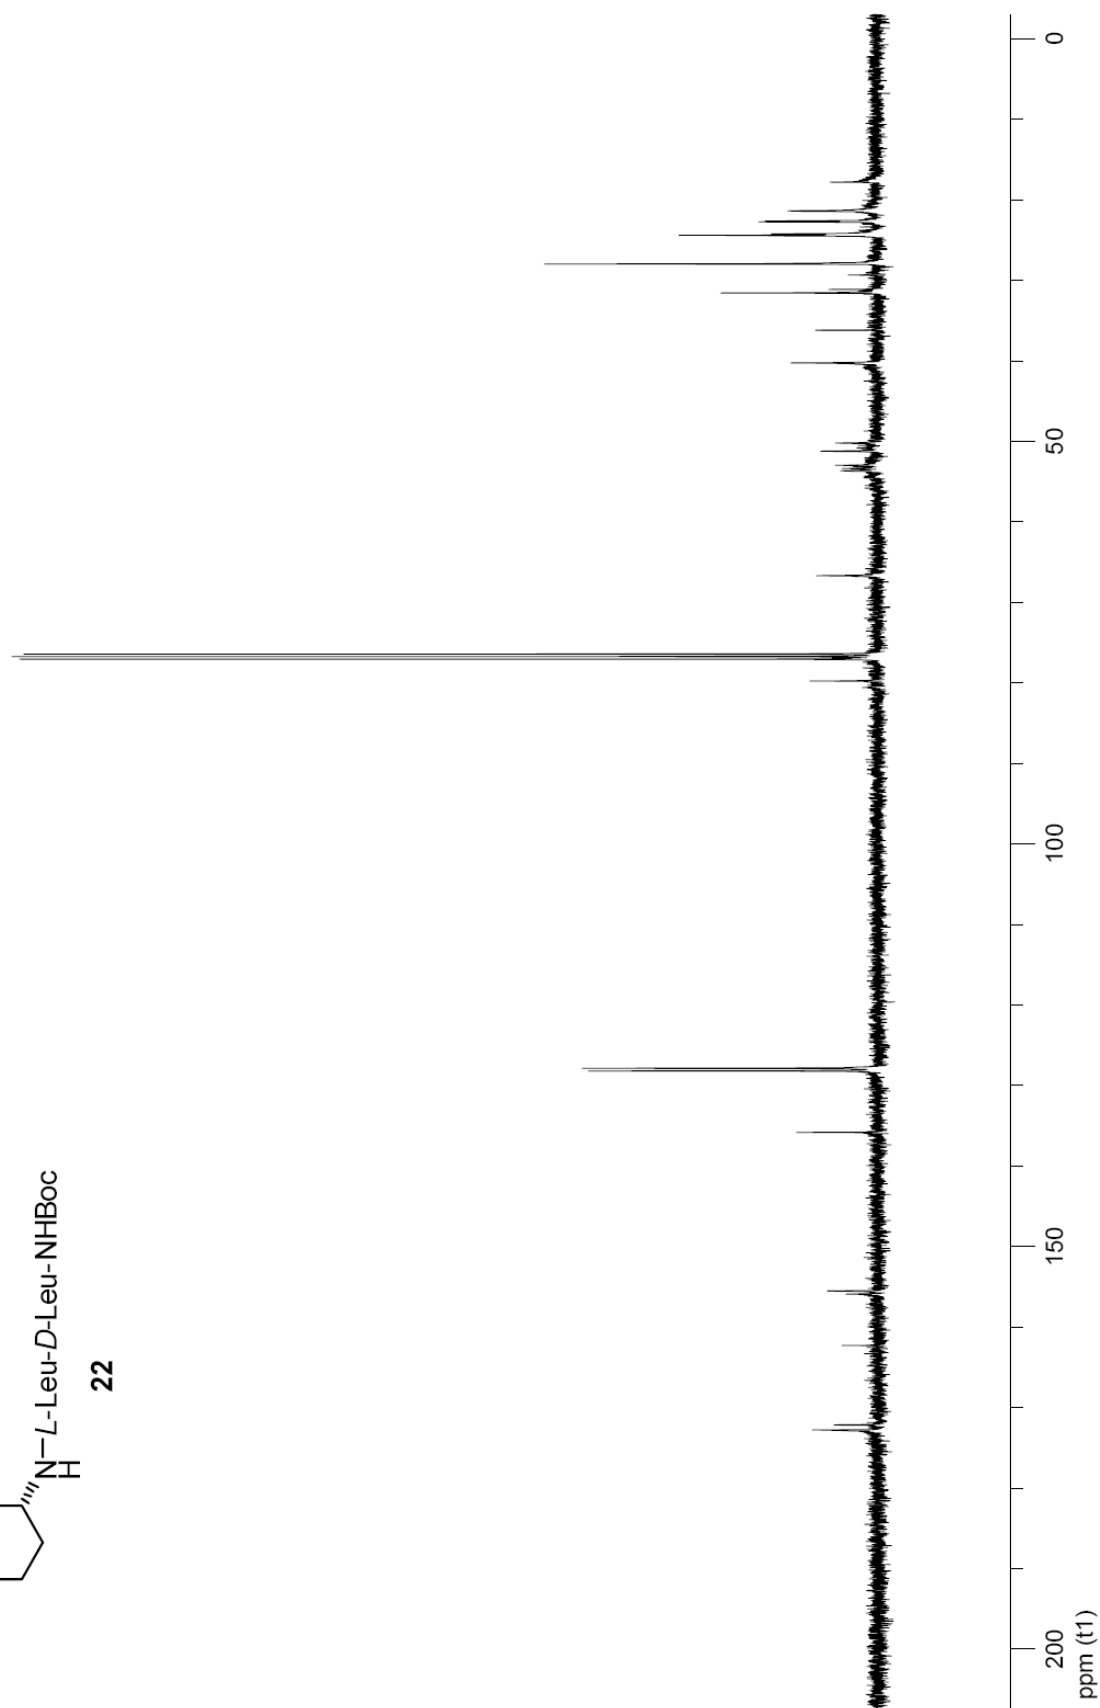

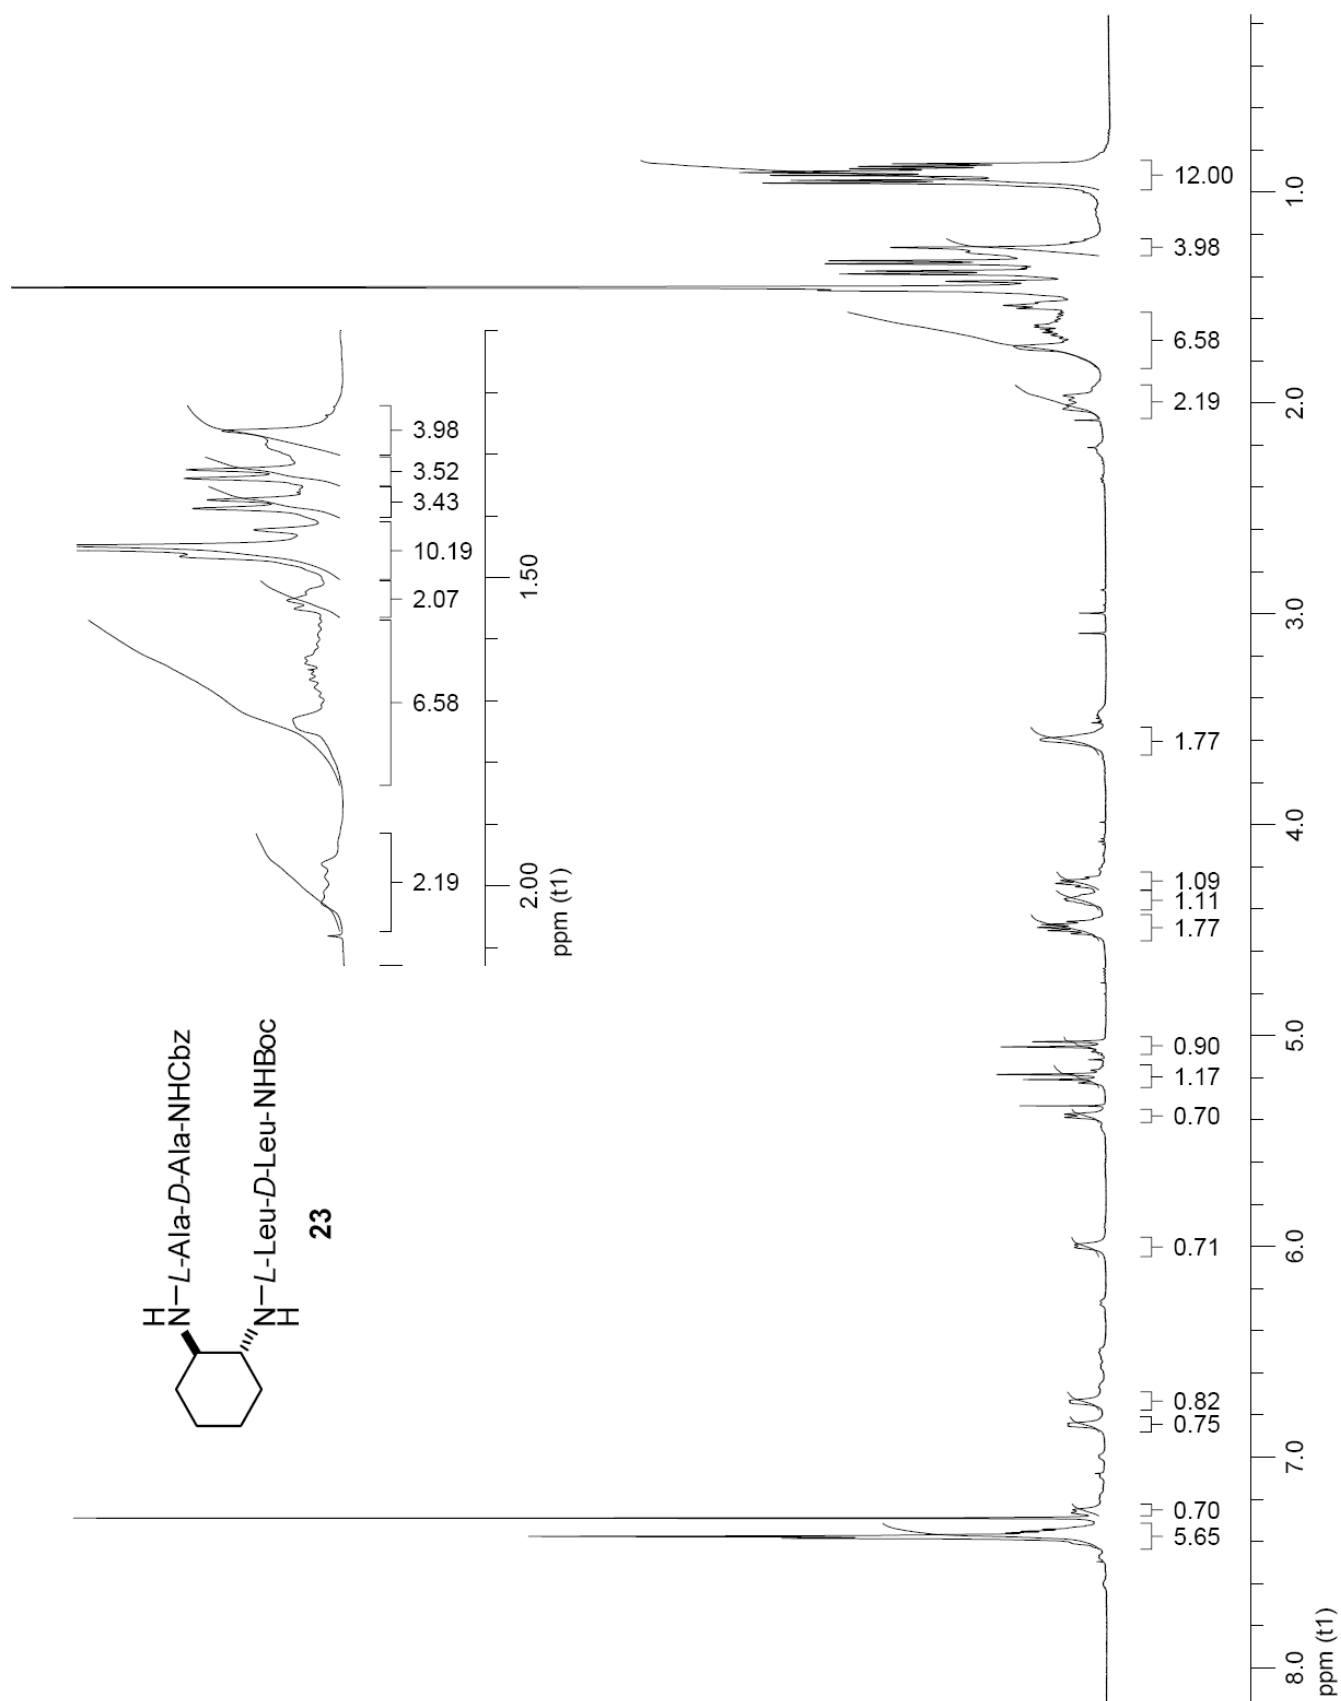

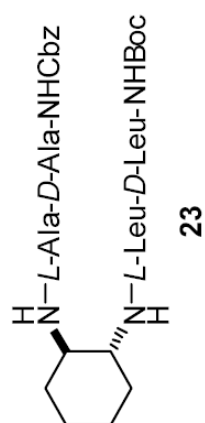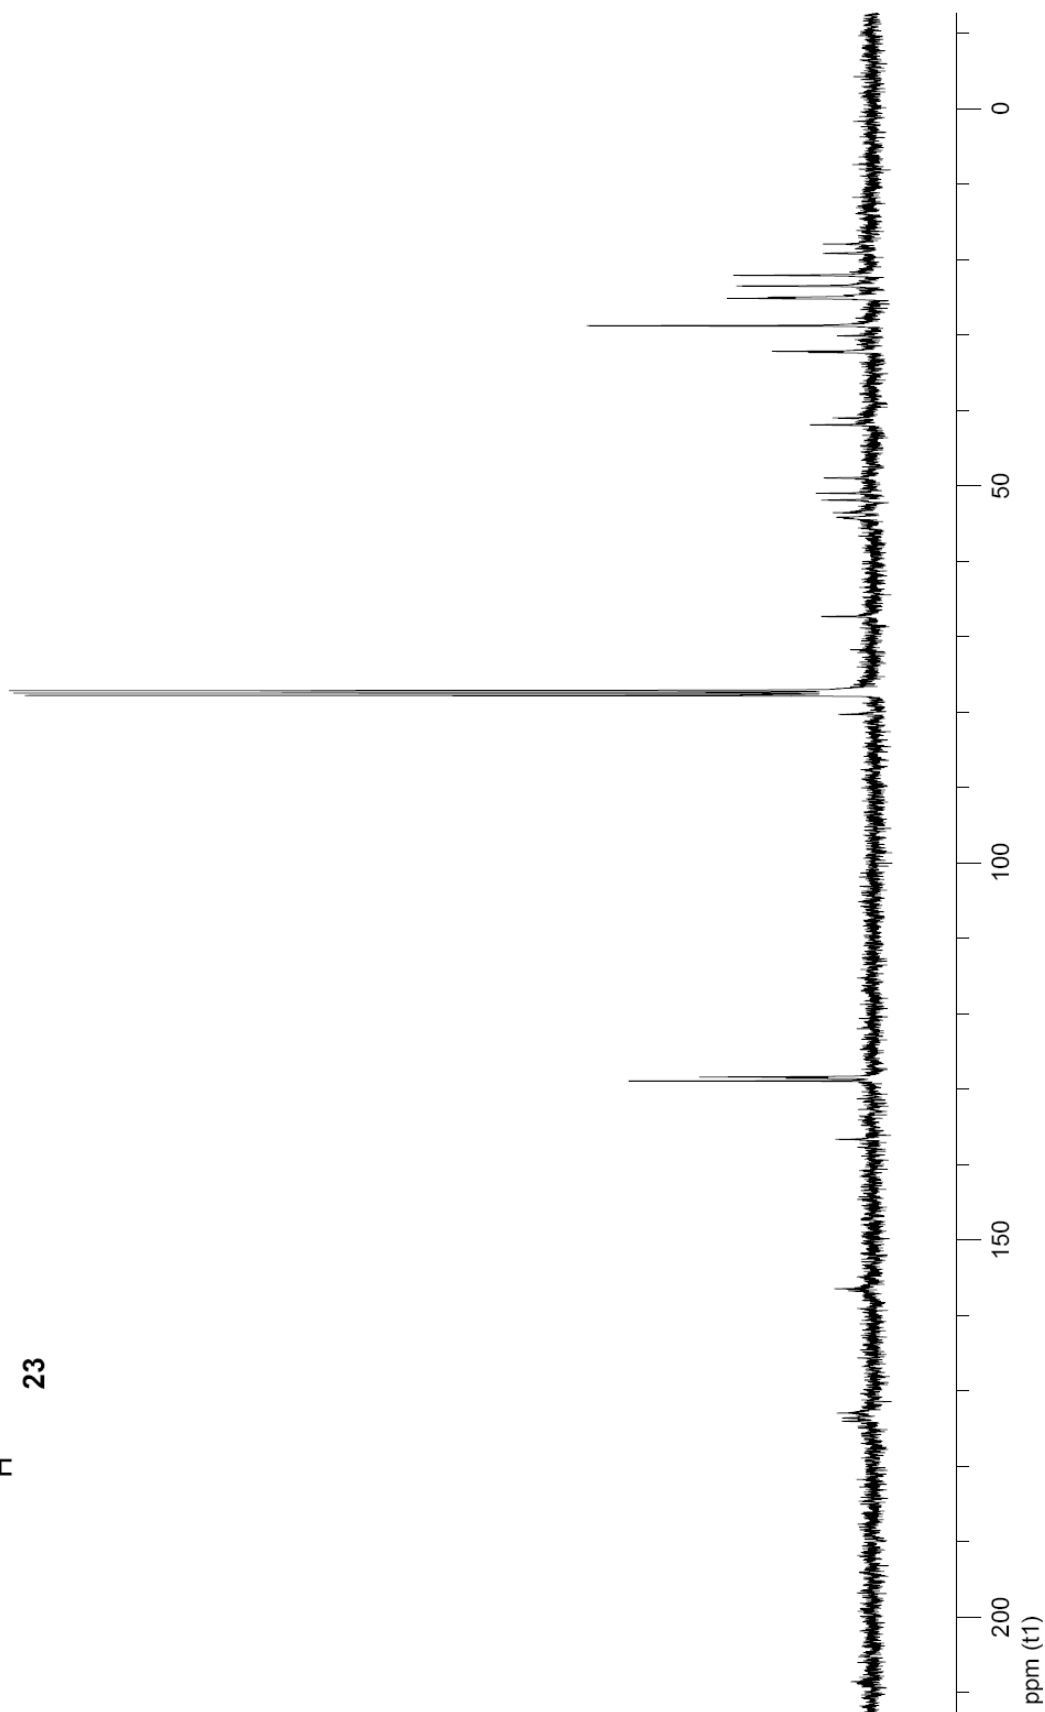

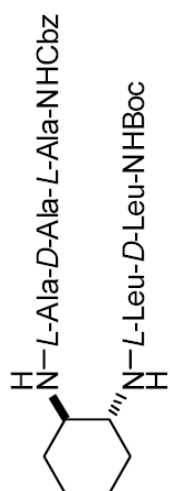**24**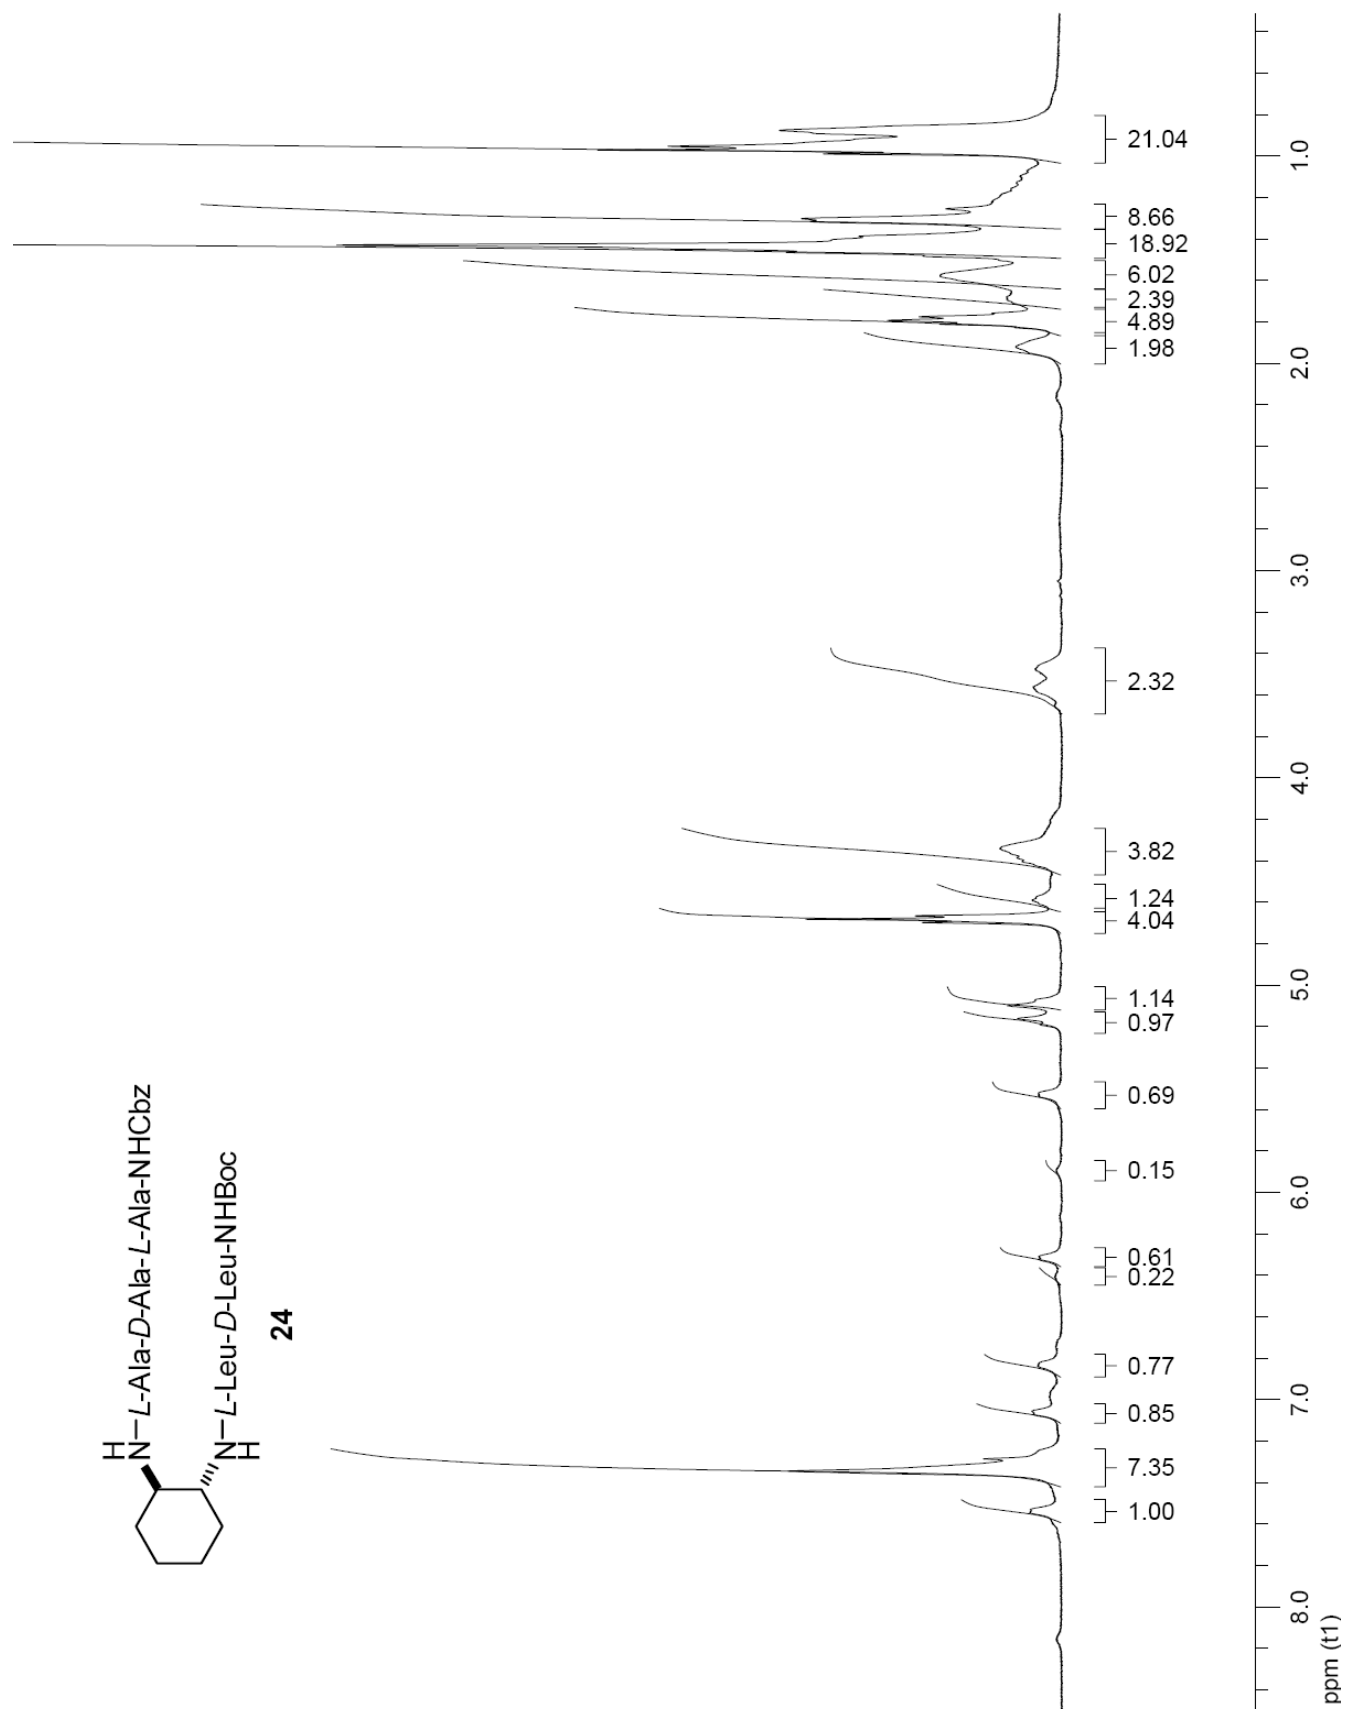

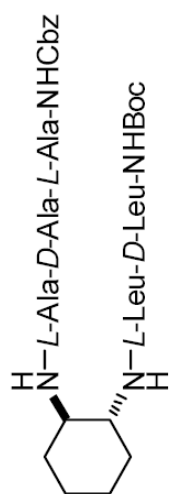**24**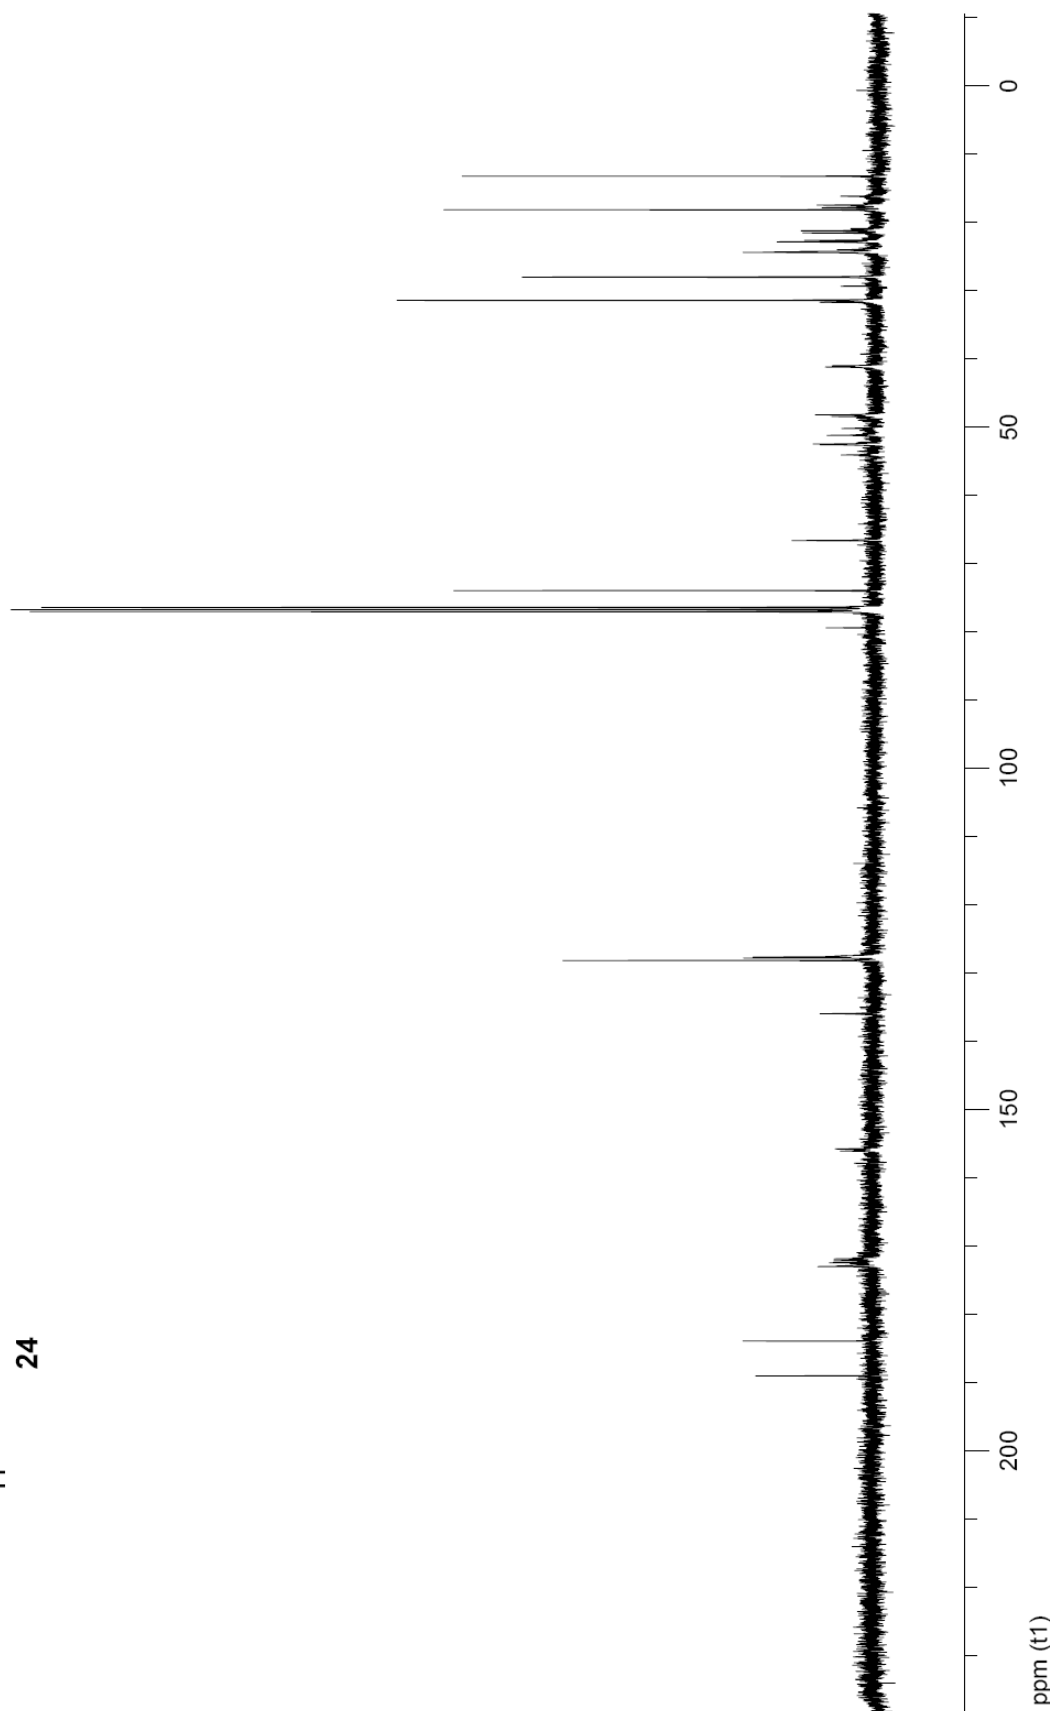

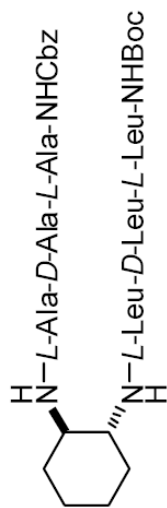

25



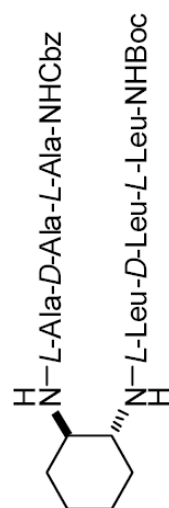**25**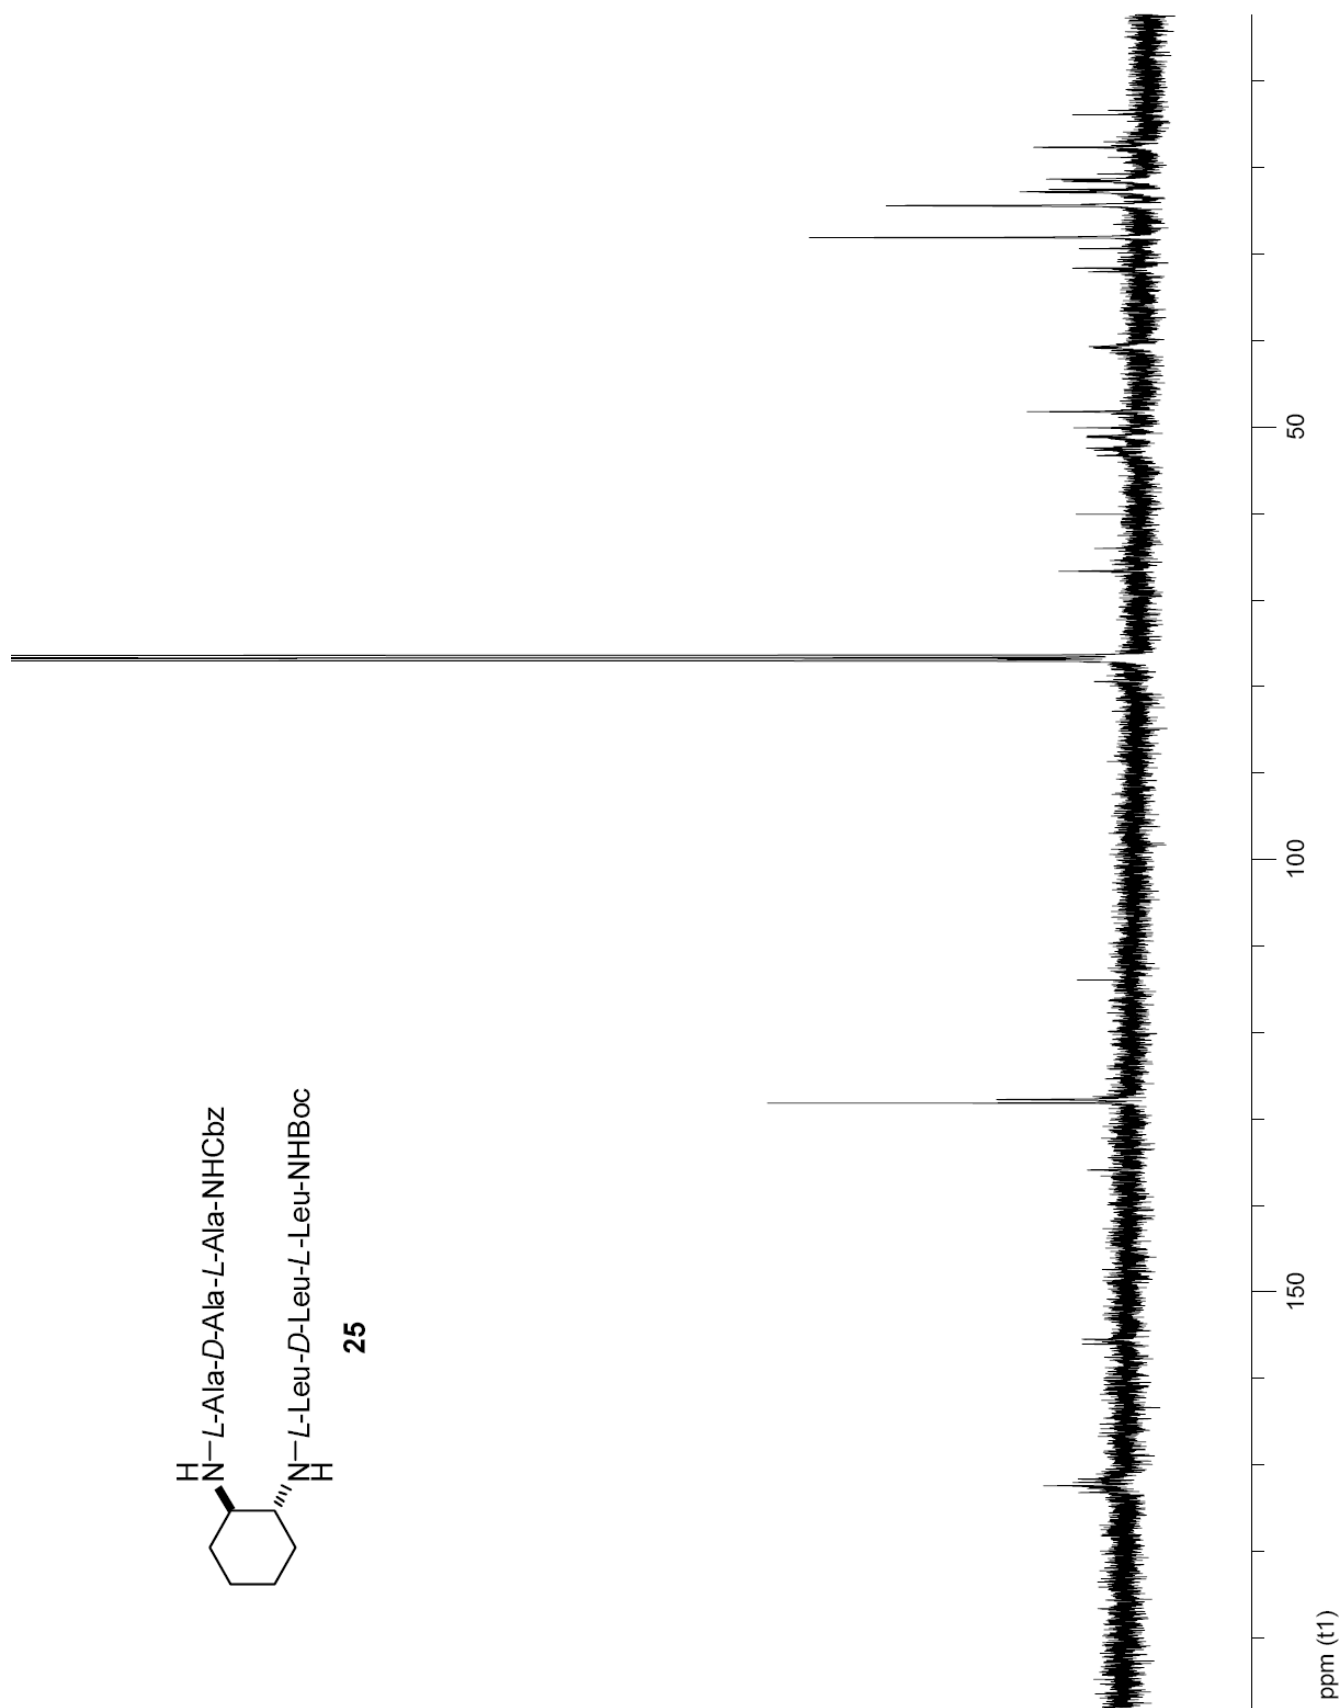

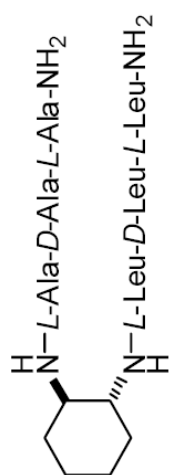**26**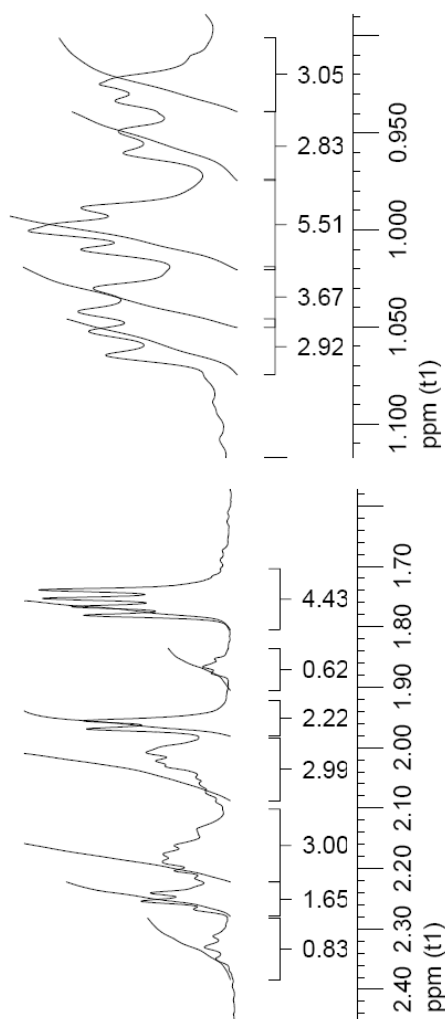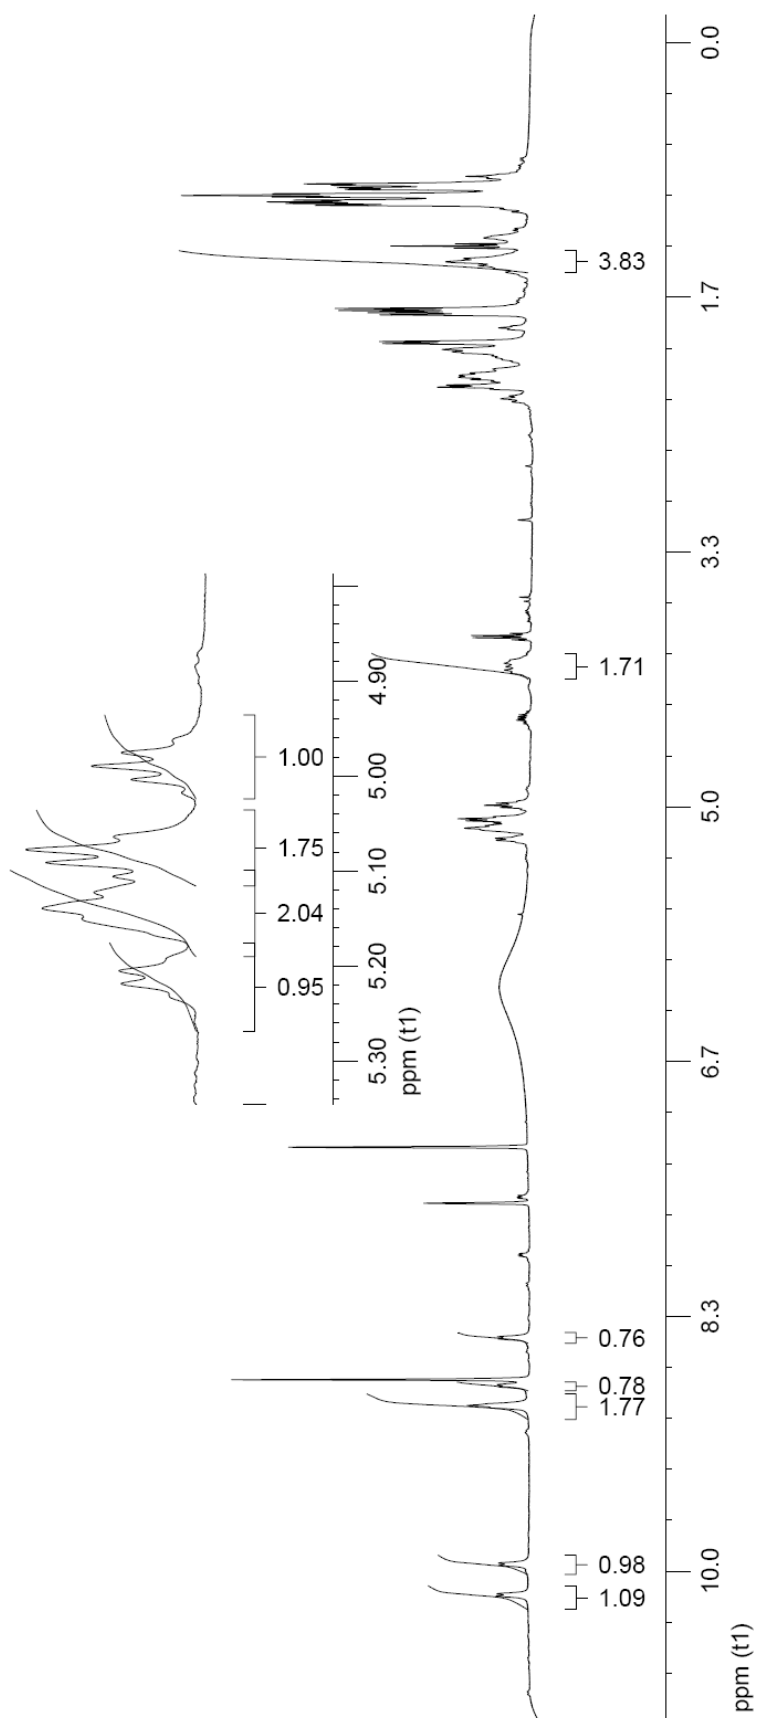

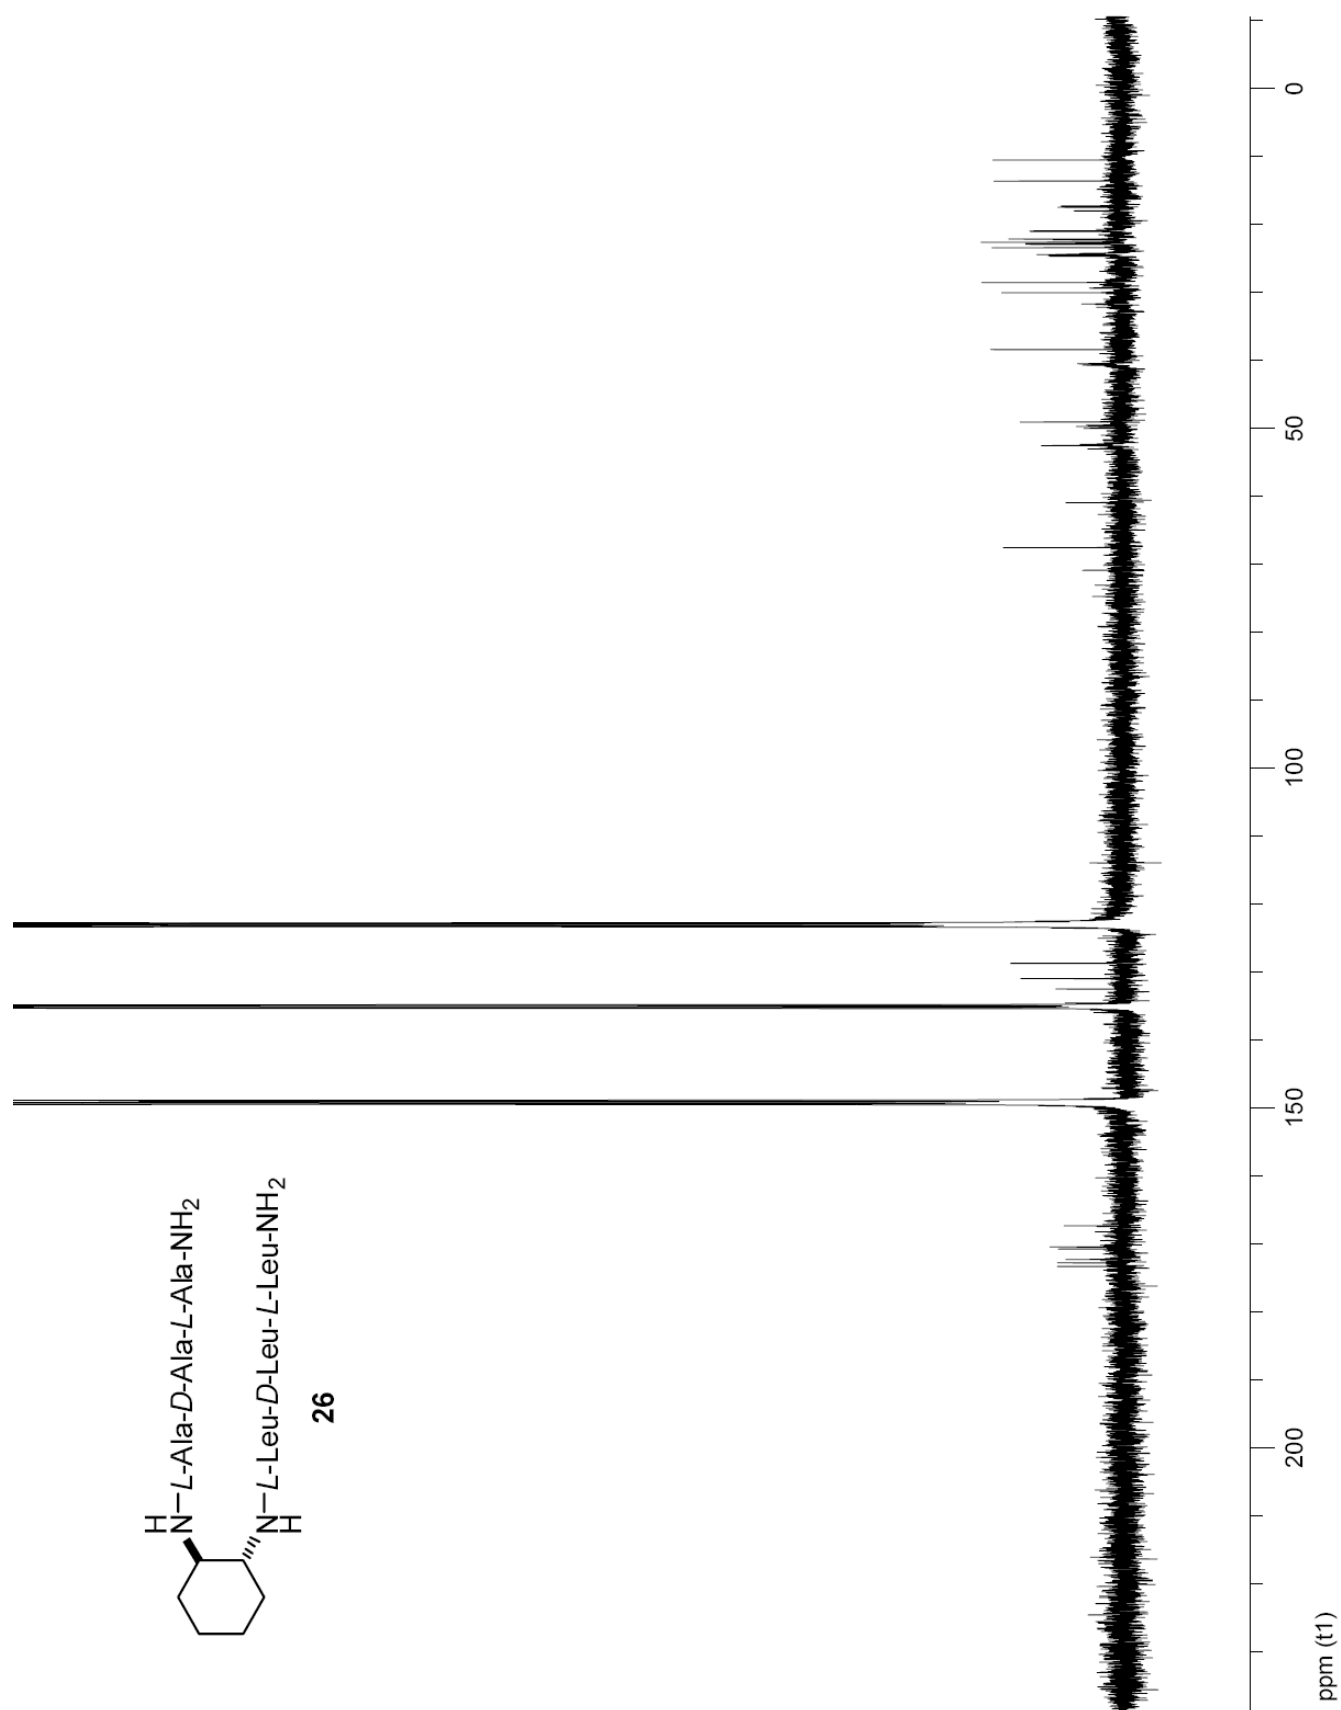

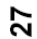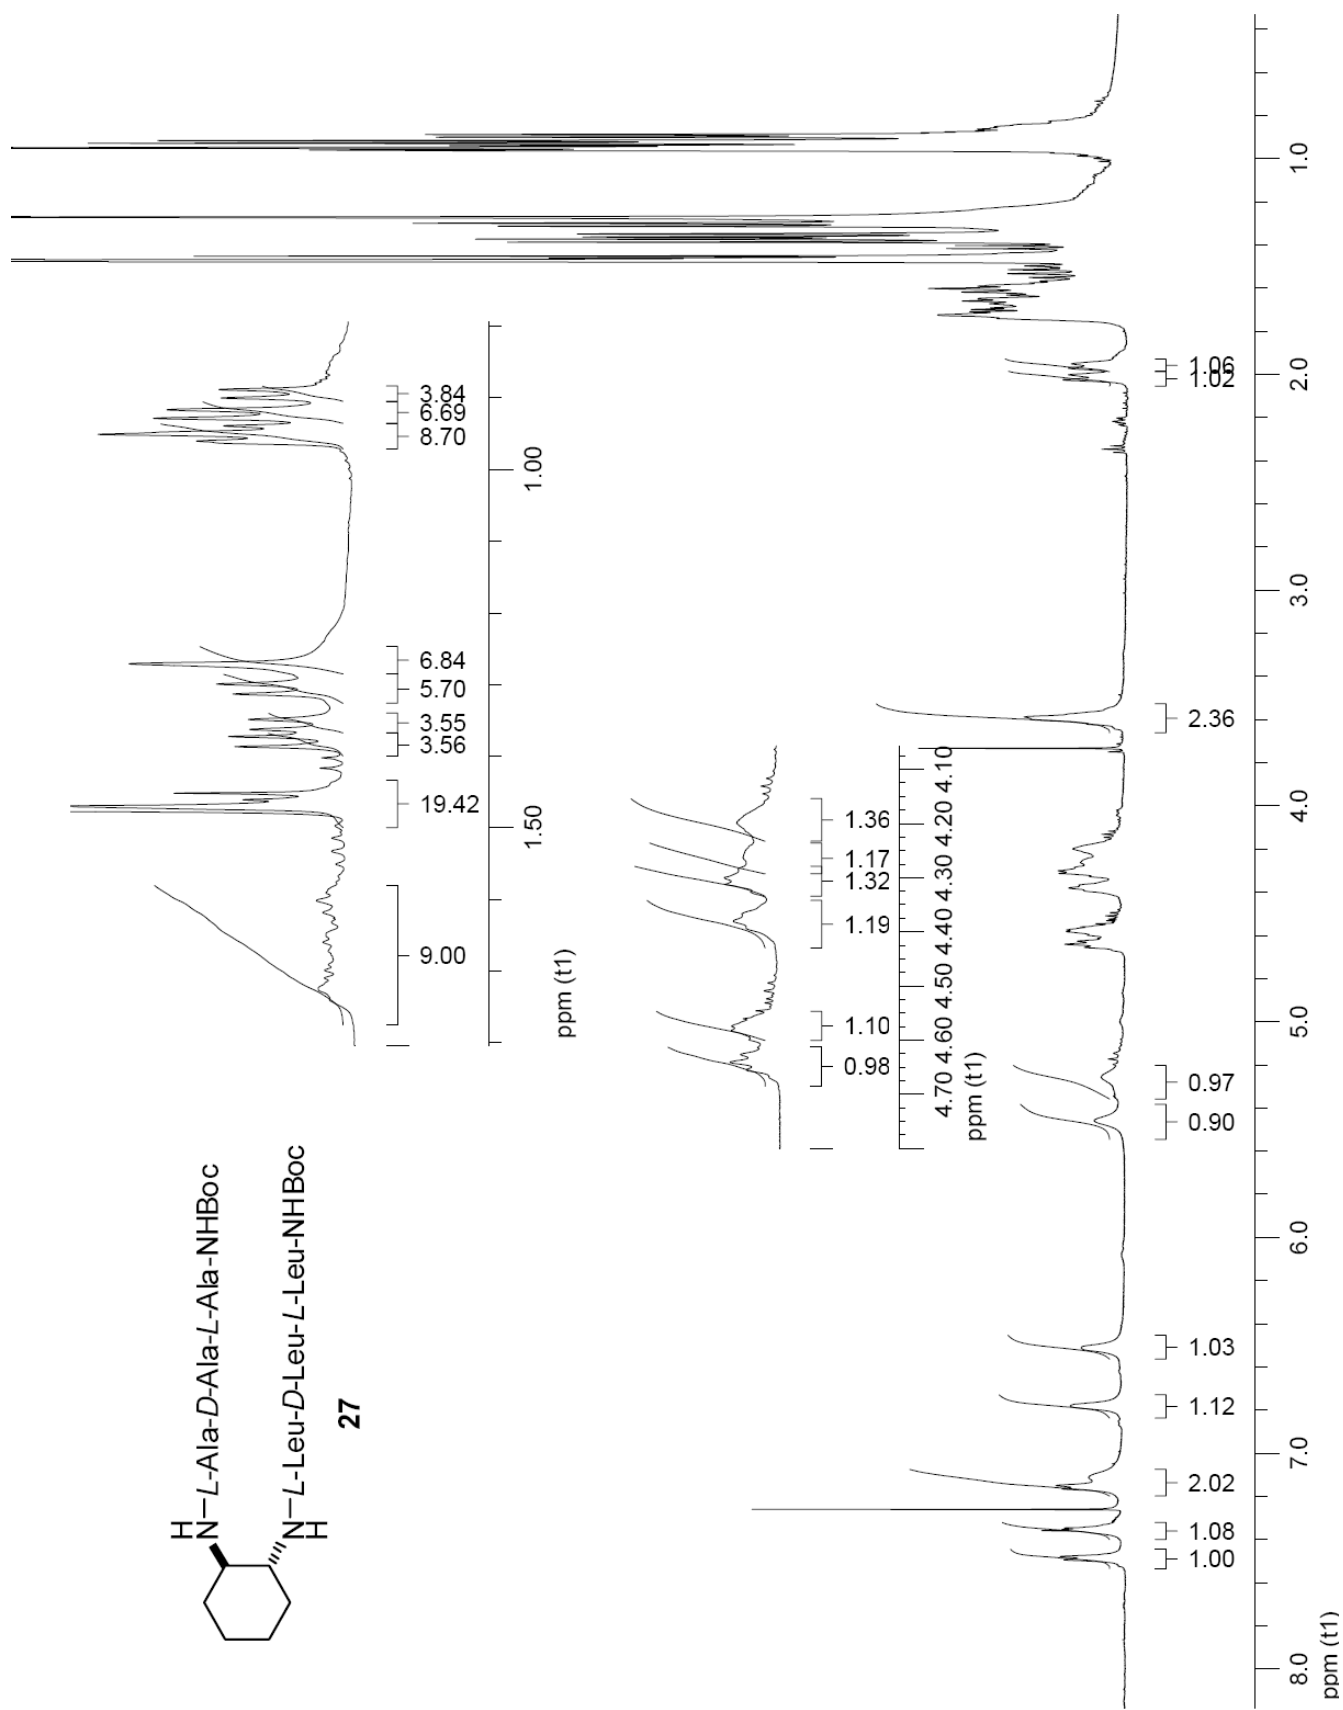

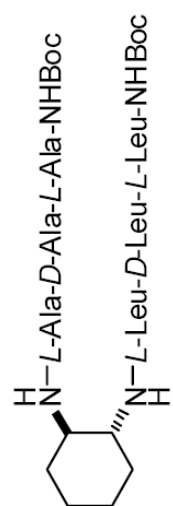

27

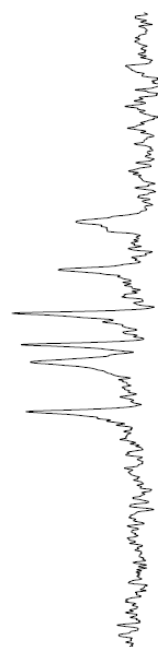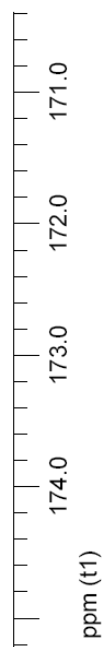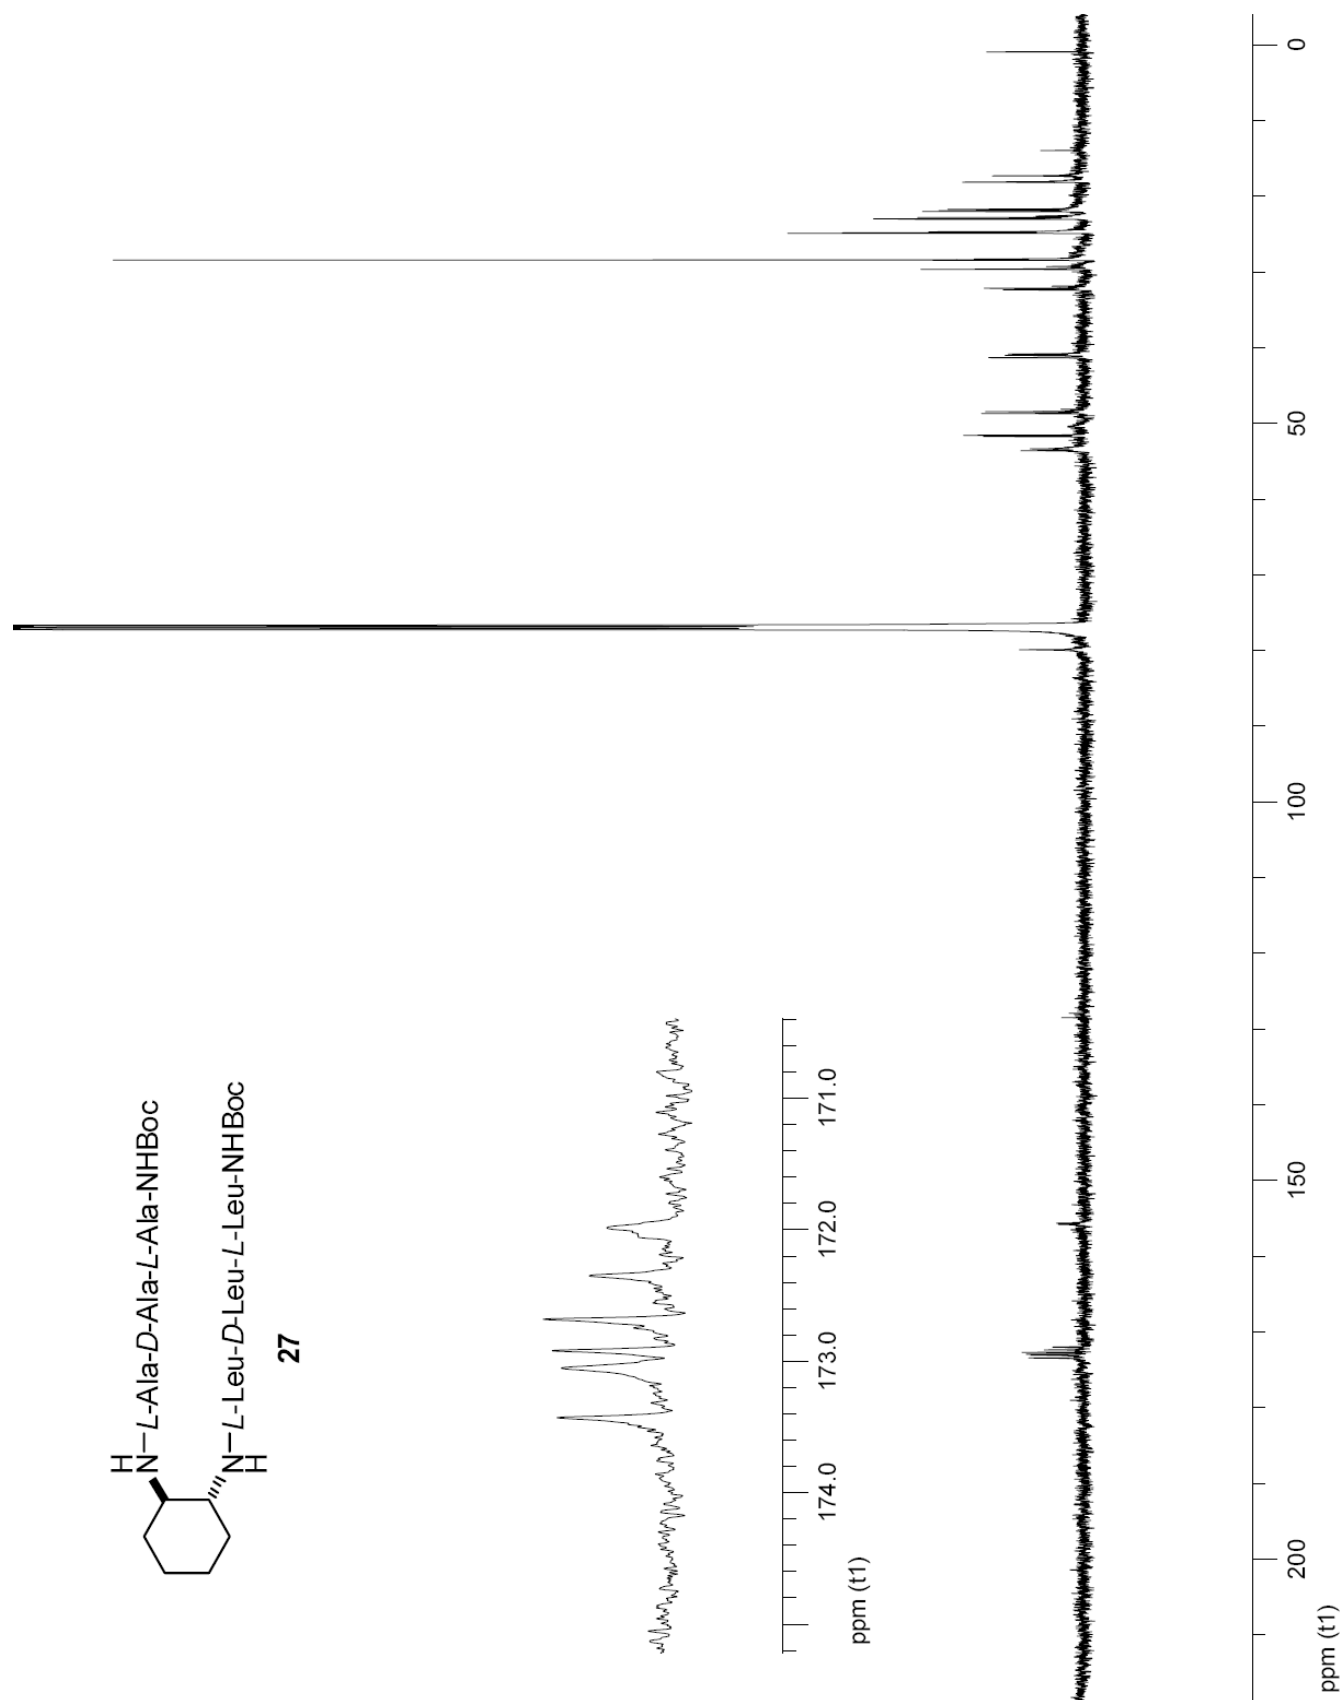

Supplement: Supplementary file 1 [file 4655965]
